# Supplementary material for: Methane conversion into different hydrocarbons or oxygenates: current status and future perspectives in catalyst development and reactor operation
Source: Royal Society of Chemistry journal article supplement (doi:10.1039/c6cy01879c), 2016-12-13
Supplement: c6cy01879c1.pdf [file c6cy01879c1.pdf]

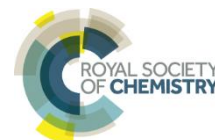

Catalysis Science & Technology

## Electronic Supplementary Information

### **Methane conversion into different hydrocarbons or oxygenates: Current status and future perspectives in catalyst development and reactor operation**

Evgenii V. Kondratenko<sup>\*</sup>, Tim Peppel, Dominik Seeburg, Vita A. Kondratenko, Narayana Kalevaru, Andreas Martin, and Sebastian Wohlrab<sup>\*</sup>

\*Corresponding author e-mail: [evgenii.kondratenko@catalysis.de](mailto:evgenii.kondratenko@catalysis.de) (EVK),  
[sebastian.wohlab@catalysis.de](mailto:sebastian.wohlab@catalysis.de) (SW)

This PDF file includes:

**Table S1:** Database with catalyst composition and their performance in OCM reaction under different conditions.

**Table S2:** Database with catalyst composition and their performance in methane oxidation to oxygenates under different reaction conditions.

**Table S1: Database with catalyst composition and their performance in OCM reaction under different conditions.**

| Reference                      | Catalyst                                               | Temp., K | p(CH <sub>4</sub> )/p(O <sub>2</sub> ) | p <sub>total</sub> , bar | X(O <sub>2</sub> ), % | X(CH <sub>4</sub> ), % | S(CO <sub>x</sub> ), % | S(C <sub>2</sub> <sup>-</sup> ), % | S(C <sub>2</sub> -), % | S(C <sub>2</sub> ), % | Y(C <sub>2</sub> ), % |
|--------------------------------|--------------------------------------------------------|----------|----------------------------------------|--------------------------|-----------------------|------------------------|------------------------|------------------------------------|------------------------|-----------------------|-----------------------|
| Appl Catal A 219 (2001) 61-68  | Na-W-Zr-Mn-S-P                                         | 1069     | 0.3                                    | 1.0                      |                       | 25.7                   | 27.9                   |                                    |                        | 72.1                  | 18.5                  |
| Appl Catal A 219 (2001) 61-68  | Na-W-Zr-Mn-S-P                                         | 1069     | 0.3                                    | 1.0                      |                       | 22.1                   | 22.4                   |                                    |                        | 77.6                  | 17.2                  |
| Appl Catal A 219 (2001) 61-68  | Na-W-Zr-Mn-S-P                                         | 1069     | 0.3                                    | 1.0                      |                       | 15.4                   | 22.3                   |                                    |                        | 77.7                  | 12.0                  |
| Appl Catal A 219 (2001) 61-68  | Na-W-Zr-Mn-S-P                                         | 1069     | 0.3                                    | 1.0                      |                       | 23.9                   | 21.2                   |                                    |                        | 78.8                  | 18.8                  |
| Appl Catal A 219 (2001) 61-68  | Na-W-Zr-Mn-S-P                                         | 1069     | 0.3                                    | 1.0                      |                       | 12.0                   | 31.9                   |                                    |                        | 68.1                  | 8.2                   |
| Appl Catal A 219 (2001) 61-68  | Na-W-Zr-Mn-S-P                                         | 1069     | 0.3                                    | 1.0                      |                       | 15.4                   | 22.3                   |                                    |                        | 77.7                  | 12.0                  |
| Appl Catal A 219 (2001) 61-68  | Na-W-Zr-Mn-S-P                                         | 1069     | 0.3                                    | 1.0                      |                       | 18.6                   | 32.7                   |                                    |                        | 67.3                  | 12.5                  |
| Appl Catal A 219 (2001) 61-68  | Na-W-Zr-Mn-S-P                                         | 1069     | 0.3                                    | 1.0                      |                       | 13.3                   | 44.1                   |                                    |                        | 56.0                  | 7.4                   |
| Appl Catal A 219 (2001) 61-68  | Na-W-Zr-Mn-S-P                                         | 1069     | 0.3                                    | 1.0                      |                       | 21.5                   | 41.9                   |                                    |                        | 58.1                  | 12.5                  |
| Appl Catal A 219 (2001) 61-68  | Na-W-Zr-Mn-S-P                                         | 1069     | 0.3                                    | 1.0                      |                       | 21.6                   | 36.8                   |                                    |                        | 63.2                  | 13.7                  |
| Appl Catal A 219 (2001) 61-68  | Na-W-Zr-Mn-S-P                                         | 1069     | 0.3                                    | 1.0                      |                       | 13.1                   | 40.5                   |                                    |                        | 59.5                  | 7.8                   |
| Appl Catal A 219 (2001) 61-68  | Na-W-Zr-Mn-S-P                                         | 1069     | 0.3                                    | 1.0                      |                       | 15.9                   | 47.0                   |                                    |                        | 53.0                  | 8.4                   |
| Appl Catal A 219 (2001) 61-68  | Na-W-Zr-Mn-S-P                                         | 1069     | 0.3                                    | 1.0                      |                       | 21.7                   | 63.6                   |                                    |                        | 36.4                  | 7.9                   |
| Appl Catal A 219 (2001) 61-68  | Na-W-Zr-Mn-S-P                                         | 1069     | 0.3                                    | 1.0                      |                       | 24.0                   | 38.1                   |                                    |                        | 61.9                  | 14.9                  |
| Appl Catal A 219 (2001) 61-68  | Na-W-Zr-Mn-S-P                                         | 1069     | 0.3                                    | 1.0                      |                       | 22.6                   | 67.1                   |                                    |                        | 32.9                  | 7.4                   |
| Appl Catal A 219 (2001) 61-68  | Na-W-Zr-Mn-S-P                                         | 1069     | 0.3                                    | 1.0                      |                       | 17.0                   | 50.3                   |                                    |                        | 49.7                  | 8.4                   |
| Appl Catal A 219 (2001) 61-68  | Na-W-Zr-Mn-S-P                                         | 1069     | 0.3                                    | 1.0                      |                       | 16.3                   | 52.5                   |                                    |                        | 47.5                  | 7.8                   |
| Appl Catal A 219 (2001) 61-68  | Na-W-Zr-Mn-S-P                                         | 1069     | 0.3                                    | 1.0                      |                       | 16.1                   | 48.2                   |                                    |                        | 51.8                  | 8.4                   |
| Appl Catal A 219 (2001) 61-68  | Na-W-Zr-Mn-S-P                                         | 1069     | 0.3                                    | 1.0                      |                       | 14.3                   | 42.9                   |                                    |                        | 57.1                  | 8.2                   |
| Appl Catal A 219 (2001) 61-68  | Na-W-Zr-Mn-S-P                                         | 1069     | 0.3                                    | 1.0                      |                       | 12.9                   | 39.5                   |                                    |                        | 60.5                  | 7.8                   |
| Appl Catal A 219 (2001) 61-68  | Na-W-Zr-Mn-S-P                                         | 1069     | 0.3                                    | 1.0                      |                       | 14.6                   | 42.4                   |                                    |                        | 57.6                  | 8.4                   |
| Appl Catal A 219 (2001) 61-68  | Na-W-Zr-Mn-S-P                                         | 1069     | 0.3                                    | 1.0                      |                       | 14.8                   | 47.0                   |                                    |                        | 53.1                  | 7.8                   |
| Appl Catal A 219 (2001) 61-68  | Na-W-Zr-Mn-S-P                                         | 1069     | 0.3                                    | 1.0                      |                       | 15.4                   | 47.0                   |                                    |                        | 53.0                  | 8.1                   |
| Appl Catal A 219 (2001) 61-68  | Na-W-Zr-Mn-S-P                                         | 1069     | 0.3                                    | 1.0                      |                       | 20.3                   | 36.0                   |                                    |                        | 64.0                  | 13.0                  |
| Appl Catal A 219 (2001) 61-68  | Na-W-Zr-Mn-S-P                                         | 1069     | 0.3                                    | 1.0                      |                       | 11.8                   | 29.0                   |                                    |                        | 71.0                  | 8.4                   |
| Appl Catal A 219 (2001) 61-68  | Na-W-Zr-Mn-S-P                                         | 1069     | 0.3                                    | 1.0                      |                       | 12.4                   | 37.5                   |                                    |                        | 62.5                  | 7.8                   |
| Appl Catal A 219 (2001) 61-68  | Na-W-Zr-Mn-S-P                                         | 1069     | 0.3                                    | 1.0                      |                       | 16.3                   | 54.3                   |                                    |                        | 45.7                  | 7.5                   |
| Appl Catal A 219 (2001) 61-68  | Na-W-Zr-Mn-S-P                                         | 1069     | 0.3                                    | 1.0                      |                       | 10.8                   | 30.8                   |                                    |                        | 69.2                  | 7.5                   |
| Appl Catal A 219 (2001) 61-68  | Na-W-Zr-Mn-S-P                                         | 1069     | 0.3                                    | 1.0                      |                       | 16.5                   | 34.1                   |                                    |                        | 65.9                  | 10.9                  |
| Appl Catal A 219 (2001) 61-68  | Na-W-Zr-Mn-S-P                                         | 1069     | 0.3                                    | 1.0                      |                       | 12.5                   | 35.8                   |                                    |                        | 64.2                  | 8.0                   |
| Appl Catal A 219 (2001) 61-68  | Na-W-Zr-Mn-S-P                                         | 1069     | 0.3                                    | 1.0                      |                       | 14.1                   | 41.4                   |                                    |                        | 58.6                  | 8.2                   |
| Appl Catal A 219 (2001) 61-68  | Na-W-Zr-Mn-S-P                                         | 1069     | 0.3                                    | 1.0                      |                       | 8.8                    | 18.3                   |                                    |                        | 81.8                  | 7.2                   |
| Appl Catal A 219 (2001) 61-68  | Na-W-Zr-Mn-S-P                                         | 1069     | 0.3                                    | 1.0                      |                       | 12.8                   | 39.1                   |                                    |                        | 60.9                  | 7.8                   |
| Appl Catal A 343(2008) 142-148 | Na-W-Mn/SiO <sub>2</sub>                               | 1123     | 7.0                                    | 1.0                      |                       | 42.0                   |                        |                                    |                        | 69.0                  | 29.0                  |
| Catal Commu 9 (2008) 960-965   | Na <sub>2</sub> WO <sub>4</sub> -ZnO/SiO <sub>2</sub>  | 873      | 7.5                                    | 1.0                      |                       | 9.0                    | 37.0                   |                                    |                        | 63.0                  | 5.7                   |
| Catal Commu 9 (2008) 960-965   | Na <sub>2</sub> WO <sub>4</sub> -CoOx/SiO <sub>2</sub> | 873      | 7.5                                    | 1.0                      |                       | 16.0                   | 32.0                   |                                    |                        | 68.0                  | 10.9                  |
| Catal Commu 9 (2008) 960-965   | Na <sub>2</sub> WO <sub>4</sub> -FeOx/SiO <sub>2</sub> | 873      | 7.5                                    | 1.0                      |                       | 15.5                   | 40.0                   |                                    |                        | 60.0                  | 9.3                   |
| Catal Commu 9 (2008) 960-965   | Na <sub>2</sub> WO <sub>4</sub> -MnOx/SiO <sub>2</sub> | 873      | 7.5                                    | 1.0                      |                       | 20.0                   | 22.0                   |                                    |                        | 78.0                  | 15.6                  |
| Catal Commu 9 (2008) 960-965   | Na <sub>2</sub> WO <sub>4</sub> -CrOx/SiO <sub>2</sub> | 873      | 7.5                                    | 1.0                      |                       | 10.0                   | 76.0                   |                                    |                        | 24.0                  | 2.4                   |
| Catal Commu 9 (2008) 960-965   | Na <sub>2</sub> WO <sub>4</sub> -VOx/SiO <sub>2</sub>  | 873      | 7.5                                    | 1.0                      |                       | 10.0                   | 88.0                   |                                    |                        | 12.0                  | 1.2                   |
| Catal Commu 9 (2008) 960-965   | Na <sub>2</sub> WO <sub>4</sub> /SiO <sub>2</sub>      | 873      | 7.5                                    | 1.0                      |                       | 11.0                   | 37.0                   |                                    |                        | 63.0                  | 6.9                   |
| Catal Commu 9 (2008) 1302-1306 | Na <sub>2</sub> WO <sub>4</sub> -Mn/SiO <sub>2</sub>   | 1023     | 4.0                                    | 1.0                      | 99.4                  | 26.3                   | 39.9                   |                                    |                        | 56.2                  | 14.8                  |

**Table S1: Database with catalyst composition and their performance in OCM reaction under different conditions.**

| Reference                            | Catalyst      | Temp., K | $p(\text{CH}_4)/p(\text{O}_2)$ | $p_{\text{total}}$ , bar | $X(\text{O}_2)$ , % | $X(\text{CH}_4)$ , % | $S(\text{CO}_x)$ , % | $S(\text{C}_2^-)$ , % | $S(\text{C}_2)$ , % | $S(\text{C}_2)$ , % | $Y(\text{C}_2)$ , % |
|--------------------------------------|---------------|----------|--------------------------------|--------------------------|---------------------|----------------------|----------------------|-----------------------|---------------------|---------------------|---------------------|
| Catal Commu 9 (2008) 1302-1306       | Na2WO4-Mn/SiC | 1023     | 4.0                            | 1.0                      | 76.9                | 21.5                 | 42.5                 |                       |                     | 51.9                | 11.2                |
| Chem Eng Sci 63 (2008) 4910-4916     | Na-W-Mn/SiO2  | 1073     | 4.0                            | 1.0                      |                     | 1.5                  | 48.0                 | 0.0                   | 52.0                | 52.0                | 0.8                 |
| Chem Eng Sci 63 (2008) 4910-4916     | Na-W-Mn/SiO2  | 1123     | 4.0                            | 1.0                      |                     | 2.2                  | 93.0                 | 0.0                   | 7.0                 | 7.0                 | 0.2                 |
| Chem Prod Prco Model 3 (2008) 1-24   | Sr-Ba-Ti      | 1023     | 1.0                            | 1.0                      |                     | 53.7                 | 53.1                 |                       |                     | 46.9                | 25.2                |
| Chem Prod Prco Model 3 (2008) 1-24   | Sr-Ba-Ti      | 1023     | 1.0                            | 1.0                      |                     | 65.4                 | 65.2                 |                       |                     | 34.8                | 22.8                |
| Chem Prod Prco Model 3 (2008) 1-24   | Sr-Ba-Ti      | 1023     | 1.0                            | 1.0                      |                     | 55.2                 | 54.3                 |                       |                     | 45.7                | 25.2                |
| Chem Prod Prco Model 3 (2008) 1-24   | Sr-Ba-Ti      | 1023     | 2.0                            | 1.0                      |                     | 32.0                 | 38.0                 |                       |                     | 62.0                | 19.9                |
| Chem Prod Prco Model 3 (2008) 1-24   | Sr-Ba-Ti      | 1023     | 2.0                            | 1.0                      |                     | 47.2                 | 45.4                 |                       |                     | 54.6                | 25.7                |
| Chem Prod Prco Model 3 (2008) 1-24   | Sr-Ba-Ti      | 1023     | 2.0                            | 1.0                      |                     | 44.2                 | 44.9                 |                       |                     | 55.1                | 24.3                |
| Chem Prod Prco Model 3 (2008) 1-24   | Sr-Ba-Ti      | 1023     | 3.0                            | 1.0                      |                     | 26.5                 | 25.3                 |                       |                     | 74.7                | 19.8                |
| Chem Prod Prco Model 3 (2008) 1-24   | Sr-Ba-Ti      | 1023     | 3.0                            | 1.0                      |                     | 32.9                 | 35.6                 |                       |                     | 64.4                | 21.2                |
| Chem Prod Prco Model 3 (2008) 1-24   | Sr-Ba-Ti      | 1023     | 3.0                            | 1.0                      |                     | 40.1                 | 32.5                 |                       |                     | 67.5                | 27.1                |
| Chem Prod Prco Model 3 (2008) 1-24   | Sr-Ba-Ti      | 1023     | 4.0                            | 1.0                      |                     | 26.0                 | 24.1                 |                       |                     | 75.9                | 19.8                |
| Chem Prod Prco Model 3 (2008) 1-24   | Sr-Ba-Ti      | 1023     | 4.0                            | 1.0                      |                     | 32.8                 | 29.7                 |                       |                     | 70.3                | 23.1                |
| Chem Prod Prco Model 3 (2008) 1-24   | Sr-Ba-Ti      | 1023     | 4.0                            | 1.0                      |                     | 19.8                 | 29.2                 |                       |                     | 70.8                | 14.0                |
| Chem Prod Prco Model 3 (2008) 1-24   | Sr-Ba-Ti      | 1023     | 7.5                            | 1.0                      |                     | 20.8                 | 15.2                 |                       |                     | 84.8                | 17.6                |
| Chem Prod Prco Model 3 (2008) 1-24   | Sr-Ba-Ti      | 1023     | 7.5                            | 1.0                      |                     | 25.2                 | 22.2                 |                       |                     | 77.8                | 19.6                |
| Chem Prod Prco Model 3 (2008) 1-24   | Sr-Ba-Ti      | 1023     | 7.5                            | 1.0                      |                     | 27.4                 | 19.0                 |                       |                     | 81.0                | 22.2                |
| Chem Prod Prco Model 3 (2008) 1-24   | Sr-Ba-Ti      | 1023     | 2.0                            | 1.0                      |                     | 37.3                 | 38.6                 |                       |                     | 61.4                | 22.9                |
| Chem Prod Prco Model 3 (2008) 1-24   | Sr-Ba-Ti      | 1023     | 2.0                            | 1.0                      |                     | 38.8                 | 48.2                 |                       |                     | 51.8                | 20.1                |
| Chem Prod Prco Model 3 (2008) 1-24   | Sr-Ba-Ti      | 1023     | 2.0                            | 1.0                      |                     | 35.3                 | 48.1                 |                       |                     | 51.9                | 18.3                |
| Chem Prod Prco Model 3 (2008) 1-24   | Sr-Ba-Ti      | 1023     | 2.5                            | 1.0                      |                     | 47.4                 | 52.8                 |                       |                     | 47.2                | 22.4                |
| Chem Prod Prco Model 3 (2008) 1-24   | Sr-Ba-Ti      | 1023     | 2.5                            | 1.0                      |                     | 31.8                 | 64.5                 |                       |                     | 35.5                | 11.3                |
| Chem Prod Prco Model 3 (2008) 1-24   | Sr-Ba-Ti      | 1023     | 2.5                            | 1.0                      |                     | 33.5                 | 59.5                 |                       |                     | 40.5                | 13.6                |
| Chem Prod Prco Model 3 (2008) 1-24   | Sr-Ba-Ti      | 1023     | 3.0                            | 1.0                      |                     | 30.2                 | 40.5                 |                       |                     | 59.5                | 18.0                |
| Chem Prod Prco Model 3 (2008) 1-24   | Sr-Ba-Ti      | 1023     | 3.0                            | 1.0                      |                     | 28.5                 | 38.3                 |                       |                     | 61.7                | 17.6                |
| Chem Prod Prco Model 3 (2008) 1-24   | Sr-Ba-Ti      | 1023     | 3.0                            | 1.0                      |                     | 25.7                 | 36.4                 |                       |                     | 63.6                | 16.3                |
| Doklady Phys Chem 422 (2008) 253-255 | La-SiO2       | 1098     | 3.0                            | 1.0                      | 43.0                | 10.0                 | 55.0                 | 21.0                  | 24.0                | 45.0                | 4.5                 |
| Doklady Phys Chem 422 (2008) 253-255 | La-SiO2       | 1131     | 3.0                            | 1.0                      | 66.0                | 17.0                 | 63.0                 | 22.0                  | 12.0                | 37.0                | 6.3                 |
| Doklady Phys Chem 422 (2008) 253-255 | La-SiO2       | 1164     | 3.0                            | 1.0                      | 83.0                | 20.0                 | 64.0                 | 24.0                  | 8.0                 | 36.0                | 7.2                 |
| Doklady Phys Chem 422 (2008) 253-255 | La-SiO2       | 1188     | 3.0                            | 1.0                      | 90.0                | 22.0                 | 67.0                 | 24.0                  | 6.0                 | 33.0                | 7.3                 |
| Doklady Phys Chem 422 (2008) 253-255 | Ce-SiO2       | 1119     | 3.0                            | 1.0                      | 60.0                | 10.0                 | 53.0                 | 15.0                  | 33.0                | 47.0                | 4.7                 |
| Doklady Phys Chem 422 (2008) 253-255 | Ce-SiO2       | 1145     | 3.0                            | 1.0                      | 98.0                | 19.0                 | 80.0                 | 13.0                  | 7.0                 | 20.0                | 3.8                 |
| Doklady Phys Chem 422 (2008) 253-255 | Ce-SiO2       | 1162     | 3.0                            | 1.0                      | 95.0                | 19.0                 | 71.0                 | 19.0                  | 8.0                 | 29.0                | 5.5                 |
| Doklady Phys Chem 422 (2008) 253-255 | Ce-SiO2       | 1198     | 3.0                            | 1.0                      | 82.0                | 17.0                 | 60.0                 | 28.0                  | 8.0                 | 40.0                | 6.8                 |
| Doklady Phys Chem 422 (2008) 253-255 | La-Ce-SiO2    | 1115     | 3.0                            | 1.0                      | 14.0                | 11.0                 | 28.0                 | 34.0                  | 35.0                | 72.0                | 7.9                 |
| Doklady Phys Chem 422 (2008) 253-255 | La-Ce-SiO2    | 1146     | 3.0                            | 1.0                      | 33.0                | 18.0                 | 32.0                 | 39.0                  | 26.0                | 68.0                | 12.2                |
| Doklady Phys Chem 422 (2008) 253-255 | La-Ce-SiO2    | 1168     | 3.0                            | 1.0                      | 56.0                | 24.0                 | 42.0                 | 37.0                  | 18.0                | 58.0                | 13.9                |
| Doklady Phys Chem 422 (2008) 253-255 | La-Ce-SiO2    | 1191     | 3.0                            | 1.0                      | 77.0                | 24.0                 | 48.0                 | 32.0                  | 14.0                | 52.0                | 12.5                |
| J Mol Catal A 286 (2008) 79-86       | LSCF          | 1073     | 3.2                            | 1.0                      |                     | 12.5                 | 79.3                 |                       |                     | 20.7                | 2.6                 |
| J Mol Catal A 286 (2008) 79-86       | LSCF          | 1098     | 3.2                            | 1.0                      |                     | 18.0                 | 70.8                 |                       |                     | 29.2                | 5.3                 |
| J Mol Catal A 286 (2008) 79-86       | LSCF          | 1123     | 3.2                            | 1.0                      |                     | 20.0                 | 62.5                 |                       |                     | 37.5                | 7.5                 |

**Table S1: Database with catalyst composition and their performance in OCM reaction under different conditions.**

| Reference                       | Catalyst       | Temp., K | $p(\text{CH}_4)/p(\text{O}_2)$ | $p_{\text{total}}$ , bar | $X(\text{O}_2)$ , % | $X(\text{CH}_4)$ , % | $S(\text{CO}_x)$ , % | $S(\text{C}_2^-)$ , % | $S(\text{C}_2^-)$ , % | $S(\text{C}_2)$ , % | $Y(\text{C}_2)$ , % |
|---------------------------------|----------------|----------|--------------------------------|--------------------------|---------------------|----------------------|----------------------|-----------------------|-----------------------|---------------------|---------------------|
| J Mol Catal A 286 (2008) 79-86  | LSCF           | 1153     | 3.2                            | 1.0                      |                     | 22.0                 | 67.7                 |                       |                       | 32.3                | 7.1                 |
| J Nat Gas Chem 17 (2008) 8-16   | Sn-Ba-Ti       | 923      | 2.0                            | 1.0                      |                     | 12.2                 | 34.4                 |                       |                       | 65.6                | 8.0                 |
| J Nat Gas Chem 17 (2008) 8-16   | Sn-Ba-Ti       | 973      | 2.0                            | 1.0                      |                     | 20.1                 | 36.0                 |                       |                       | 64.0                | 12.9                |
| J Nat Gas Chem 17 (2008) 8-16   | Sn-Ba-Ti       | 1073     | 2.0                            | 1.0                      |                     | 49.0                 | 42.0                 |                       |                       | 58.0                | 28.4                |
| J Nat Gas Chem 17 (2008) 8-16   | Sn-Ba-Ti       | 1048     | 1.0                            | 1.0                      |                     | 46.2                 | 41.8                 |                       |                       | 58.2                | 26.9                |
| J Nat Gas Chem 17 (2008) 8-16   | Sn-Ba-Ti       | 1048     | 2.0                            | 1.0                      |                     | 43.8                 | 36.2                 |                       |                       | 63.8                | 27.9                |
| J Nat Gas Chem 17 (2008) 8-16   | Sn-Ba-Ti       | 1048     | 3.0                            | 1.0                      |                     | 32.9                 | 35.7                 |                       |                       | 64.3                | 21.2                |
| J Nat Gas Chem 17 (2008) 8-16   | Sn-Ba-Ti       | 1048     | 4.0                            | 1.0                      |                     | 31.1                 | 29.7                 |                       |                       | 70.3                | 21.8                |
| J Nat Gas Chem 17 (2008) 8-16   | Sn-Ba-Ti       | 1048     | 7.5                            | 1.0                      |                     | 25.2                 | 22.2                 |                       |                       | 77.8                | 19.6                |
| J Nat Gas Chem 17 (2008) 8-16   | Sn-Ba-Ti       | 1048     | 1.0                            | 1.0                      |                     | 55.2                 | 54.3                 |                       |                       | 45.7                | 25.2                |
| J Nat Gas Chem 17 (2008) 8-16   | Sn-Ba-Ti       | 1048     | 2.0                            | 1.0                      |                     | 44.2                 | 44.9                 |                       |                       | 55.1                | 24.3                |
| J Nat Gas Chem 17 (2008) 8-16   | Sn-Ba-Ti       | 1048     | 3.0                            | 1.0                      |                     | 35.8                 | 38.0                 |                       |                       | 62.0                | 22.2                |
| J Nat Gas Chem 17 (2008) 8-16   | Sn-Ba-Ti       | 1048     | 4.0                            | 1.0                      |                     | 32.1                 | 33.0                 |                       |                       | 67.0                | 21.5                |
| J Nat Gas Chem 17 (2008) 8-16   | Sn-Ba-Ti       | 1048     | 7.5                            | 1.0                      |                     | 29.9                 | 20.4                 |                       |                       | 79.7                | 23.8                |
| J Nat Gas Chem 17 (2008) 8-16   | Sn-Ba-Ti       | 1048     | 1.0                            | 1.0                      |                     | 49.4                 | 34.0                 |                       |                       | 66.0                | 32.6                |
| J Nat Gas Chem 17 (2008) 8-16   | Sn-Ba-Ti       | 1048     | 2.0                            | 1.0                      |                     | 39.3                 | 30.0                 |                       |                       | 70.0                | 27.5                |
| J Nat Gas Chem 17 (2008) 8-16   | Sn-Ba-Ti       | 1048     | 3.0                            | 1.0                      |                     | 26.5                 | 27.3                 |                       |                       | 72.7                | 19.3                |
| J Nat Gas Chem 17 (2008) 8-16   | Sn-Ba-Ti       | 1048     | 4.0                            | 1.0                      |                     | 26.0                 | 24.1                 |                       |                       | 75.9                | 19.7                |
| J Nat Gas Chem 17 (2008) 8-16   | Sn-Ba-Ti       | 1048     | 7.5                            | 1.0                      |                     | 20.8                 | 15.6                 |                       |                       | 84.4                | 17.5                |
| Appl Catal A 354 (2009) 143-152 | La-Sr-Co-Fe-O3 | 1073     | 8.2                            | 1.0                      |                     | 1.4                  |                      | 57.7                  |                       |                     |                     |
| Appl Catal A 354 (2009) 143-152 | La-Sr-Co-Fe-O3 | 1073     | 7.1                            | 1.0                      |                     | 1.7                  |                      | 55.6                  |                       |                     |                     |
| Appl Catal A 354 (2009) 143-152 | La-Sr-Co-Fe-O3 | 1073     | 6.0                            | 1.0                      |                     | 1.9                  |                      | 52.2                  |                       |                     |                     |
| Appl Catal A 354 (2009) 143-152 | La-Sr-Co-Fe-O3 | 1073     | 5.0                            | 1.0                      |                     | 2.2                  |                      | 51.6                  |                       |                     |                     |
| Appl Catal A 354 (2009) 143-152 | La-Sr-Co-Fe-O3 | 1073     | 4.1                            | 1.0                      |                     | 2.5                  |                      | 53.4                  |                       |                     |                     |
| Appl Catal A 354 (2009) 143-152 | La-Sr-Co-Fe-O3 | 1073     | 3.1                            | 1.0                      |                     | 2.7                  |                      | 48.1                  |                       |                     |                     |
| Appl Catal A 354 (2009) 143-152 | La-Sr-Co-Fe-O3 | 1073     | 2.1                            | 1.0                      |                     | 2.8                  |                      | 43.2                  |                       |                     |                     |
| Appl Catal A 354 (2009) 143-152 | La-Sr-Co-Fe-O3 | 1073     | 7.4                            | 1.0                      |                     | 1.7                  |                      | 37.2                  |                       |                     |                     |
| Appl Catal A 354 (2009) 143-152 | La-Sr-Co-Fe-O3 | 1073     | 5.3                            | 1.0                      |                     | 2.0                  |                      | 43.5                  |                       |                     |                     |
| Appl Catal A 354 (2009) 143-152 | La-Sr-Co-Fe-O3 | 1073     | 3.2                            | 1.0                      |                     | 2.7                  |                      | 50.3                  |                       |                     |                     |
| Appl Catal A 354 (2009) 143-152 | La-Sr-Co-Fe-O3 | 1073     | 2.4                            | 1.0                      |                     | 3.1                  |                      | 43.6                  |                       |                     |                     |
| Appl Catal A 354 (2009) 143-152 | La-Sr-Co-Fe-O3 | 1073     | 2.1                            | 1.0                      |                     | 3.5                  |                      | 34.2                  |                       |                     |                     |
| Appl Catal A 354 (2009) 143-152 | La-Sr-Co-Fe-O3 | 1098     | 8.2                            | 1.0                      |                     | 2.2                  |                      | 50.1                  |                       |                     |                     |
| Appl Catal A 354 (2009) 143-152 | La-Sr-Co-Fe-O3 | 1098     | 7.1                            | 1.0                      |                     | 2.6                  |                      | 46.9                  |                       |                     |                     |
| Appl Catal A 354 (2009) 143-152 | La-Sr-Co-Fe-O3 | 1098     | 6.0                            | 1.0                      |                     | 2.9                  |                      | 49.0                  |                       |                     |                     |
| Appl Catal A 354 (2009) 143-152 | La-Sr-Co-Fe-O3 | 1098     | 5.0                            | 1.0                      |                     | 3.3                  |                      | 47.1                  |                       |                     |                     |
| Appl Catal A 354 (2009) 143-152 | La-Sr-Co-Fe-O3 | 1098     | 4.1                            | 1.0                      |                     | 3.9                  |                      | 42.9                  |                       |                     |                     |
| Appl Catal A 354 (2009) 143-152 | La-Sr-Co-Fe-O3 | 1098     | 3.1                            | 1.0                      |                     | 4.7                  |                      | 41.3                  |                       |                     |                     |
| Appl Catal A 354 (2009) 143-152 | La-Sr-Co-Fe-O3 | 1098     | 2.1                            | 1.0                      |                     | 4.9                  |                      | 31.0                  |                       |                     |                     |
| Appl Catal A 354 (2009) 143-152 | La-Sr-Co-Fe-O3 | 1098     | 7.4                            | 1.0                      |                     | 2.3                  |                      | 43.2                  |                       |                     |                     |
| Appl Catal A 354 (2009) 143-152 | La-Sr-Co-Fe-O3 | 1098     | 5.3                            | 1.0                      |                     | 2.6                  |                      | 45.0                  |                       |                     |                     |
| Appl Catal A 354 (2009) 143-152 | La-Sr-Co-Fe-O3 | 1098     | 3.2                            | 1.0                      |                     | 3.2                  |                      | 51.0                  |                       |                     |                     |
| Appl Catal A 354 (2009) 143-152 | La-Sr-Co-Fe-O3 | 1098     | 2.4                            | 1.0                      |                     | 3.7                  |                      | 43.4                  |                       |                     |                     |
| Appl Catal A 354 (2009) 143-152 | La-Sr-Co-Fe-O3 | 1098     | 2.1                            | 1.0                      |                     | 4.2                  |                      | 39.2                  |                       |                     |                     |

**Table S1: Database with catalyst composition and their performance in OCM reaction under different conditions.**

| Reference                       | Catalyst       | Temp., K | $p(\text{CH}_4)/p(\text{O}_2)$ | $p_{\text{total}}$ , bar | $X(\text{O}_2)$ , % | $X(\text{CH}_4)$ , % | $S(\text{CO}_x)$ , % | $S(\text{C}_2^-)$ , % | $S(\text{C}_2^-)$ , % | $S(\text{C}_2)$ , % | $Y(\text{C}_2)$ , % |
|---------------------------------|----------------|----------|--------------------------------|--------------------------|---------------------|----------------------|----------------------|-----------------------|-----------------------|---------------------|---------------------|
| Appl Catal A 354 (2009) 143-152 | La-Sr-Co-Fe-O3 | 1123     | 8.2                            | 1.0                      |                     | 2.6                  |                      | 52.6                  |                       |                     |                     |
| Appl Catal A 354 (2009) 143-152 | La-Sr-Co-Fe-O3 | 1123     | 7.1                            | 1.0                      |                     | 3.0                  |                      | 52.2                  |                       |                     |                     |
| Appl Catal A 354 (2009) 143-152 | La-Sr-Co-Fe-O3 | 1123     | 6.0                            | 1.0                      |                     | 3.4                  |                      | 53.6                  |                       |                     |                     |
| Appl Catal A 354 (2009) 143-152 | La-Sr-Co-Fe-O3 | 1123     | 5.0                            | 1.0                      |                     | 4.0                  |                      | 52.9                  |                       |                     |                     |
| Appl Catal A 354 (2009) 143-152 | La-Sr-Co-Fe-O3 | 1123     | 4.1                            | 1.0                      |                     | 4.8                  |                      | 52.9                  |                       |                     |                     |
| Appl Catal A 354 (2009) 143-152 | La-Sr-Co-Fe-O3 | 1123     | 3.1                            | 1.0                      |                     | 5.3                  |                      | 52.1                  |                       |                     |                     |
| Appl Catal A 354 (2009) 143-152 | La-Sr-Co-Fe-O3 | 1123     | 2.1                            | 1.0                      |                     | 6.2                  |                      | 49.8                  |                       |                     |                     |
| Appl Catal A 354 (2009) 143-152 | La-Sr-Co-Fe-O3 | 1123     | 7.4                            | 1.0                      |                     | 2.7                  |                      | 46.1                  |                       |                     |                     |
| Appl Catal A 354 (2009) 143-152 | La-Sr-Co-Fe-O3 | 1123     | 5.3                            | 1.0                      |                     | 3.7                  |                      | 41.0                  |                       |                     |                     |
| Appl Catal A 354 (2009) 143-152 | La-Sr-Co-Fe-O3 | 1123     | 3.2                            | 1.0                      |                     | 5.7                  |                      | 50.8                  |                       |                     |                     |
| Appl Catal A 354 (2009) 143-152 | La-Sr-Co-Fe-O3 | 1123     | 2.4                            | 1.0                      |                     | 7.2                  |                      | 39.7                  |                       |                     |                     |
| Appl Catal A 354 (2009) 143-152 | La-Sr-Co-Fe-O3 | 1123     | 2.1                            | 1.0                      |                     | 8.6                  |                      | 29.1                  |                       |                     |                     |
| Appl Catal A 354 (2009) 143-152 | La-Sr-Co-Fe-O3 | 1153     | 8.2                            | 1.0                      |                     | 3.5                  |                      | 48.4                  |                       |                     |                     |
| Appl Catal A 354 (2009) 143-152 | La-Sr-Co-Fe-O3 | 1153     | 7.1                            | 1.0                      |                     | 4.1                  |                      | 47.4                  |                       |                     |                     |
| Appl Catal A 354 (2009) 143-152 | La-Sr-Co-Fe-O3 | 1153     | 6.0                            | 1.0                      |                     | 4.7                  |                      | 45.8                  |                       |                     |                     |
| Appl Catal A 354 (2009) 143-152 | La-Sr-Co-Fe-O3 | 1153     | 5.0                            | 1.0                      |                     | 5.6                  |                      | 47.1                  |                       |                     |                     |
| Appl Catal A 354 (2009) 143-152 | La-Sr-Co-Fe-O3 | 1153     | 4.1                            | 1.0                      |                     | 6.5                  |                      | 46.0                  |                       |                     |                     |
| Appl Catal A 354 (2009) 143-152 | La-Sr-Co-Fe-O3 | 1153     | 3.1                            | 1.0                      |                     | 7.5                  |                      | 45.0                  |                       |                     |                     |
| Appl Catal A 354 (2009) 143-152 | La-Sr-Co-Fe-O3 | 1153     | 2.1                            | 1.0                      |                     | 7.6                  |                      | 44.2                  |                       |                     |                     |
| Appl Catal A 354 (2009) 143-152 | La-Sr-Co-Fe-O3 | 1153     | 7.4                            | 1.0                      |                     | 3.4                  |                      | 35.0                  |                       |                     |                     |
| Appl Catal A 354 (2009) 143-152 | La-Sr-Co-Fe-O3 | 1153     | 5.3                            | 1.0                      |                     | 4.8                  |                      | 37.7                  |                       |                     |                     |
| Appl Catal A 354 (2009) 143-152 | La-Sr-Co-Fe-O3 | 1153     | 3.2                            | 1.0                      |                     | 7.3                  |                      | 42.1                  |                       |                     |                     |
| Appl Catal A 354 (2009) 143-152 | La-Sr-Co-Fe-O3 | 1153     | 2.4                            | 1.0                      |                     | 9.8                  |                      | 31.0                  |                       |                     |                     |
| Appl Catal A 354 (2009) 143-152 | La-Sr-Co-Fe-O3 | 1153     | 2.1                            | 1.0                      |                     | 12.0                 |                      | 25.5                  |                       |                     |                     |
| Appl Catal A 354 (2009) 143-152 | La-Sr-Co-Fe-O3 | 1173     | 8.2                            | 1.0                      |                     | 4.4                  |                      | 41.8                  |                       |                     |                     |
| Appl Catal A 354 (2009) 143-152 | La-Sr-Co-Fe-O3 | 1173     | 7.1                            | 1.0                      |                     | 4.7                  |                      | 46.1                  |                       |                     |                     |
| Appl Catal A 354 (2009) 143-152 | La-Sr-Co-Fe-O3 | 1173     | 6.0                            | 1.0                      |                     | 5.4                  |                      | 45.3                  |                       |                     |                     |
| Appl Catal A 354 (2009) 143-152 | La-Sr-Co-Fe-O3 | 1173     | 5.0                            | 1.0                      |                     | 6.3                  |                      | 43.7                  |                       |                     |                     |
| Appl Catal A 354 (2009) 143-152 | La-Sr-Co-Fe-O3 | 1173     | 4.1                            | 1.0                      |                     | 6.8                  |                      | 42.9                  |                       |                     |                     |
| Appl Catal A 354 (2009) 143-152 | La-Sr-Co-Fe-O3 | 1173     | 3.1                            | 1.0                      |                     | 7.5                  |                      | 40.3                  |                       |                     |                     |
| Appl Catal A 354 (2009) 143-152 | La-Sr-Co-Fe-O3 | 1173     | 2.1                            | 1.0                      |                     | 8.8                  |                      | 36.9                  |                       |                     |                     |
| Appl Catal A 354 (2009) 143-152 | La-Sr-Co-Fe-O3 | 1173     | 7.4                            | 1.0                      |                     | 4.4                  |                      | 35.5                  |                       |                     |                     |
| Appl Catal A 354 (2009) 143-152 | La-Sr-Co-Fe-O3 | 1173     | 5.3                            | 1.0                      |                     | 5.7                  |                      | 39.2                  |                       |                     |                     |
| Appl Catal A 354 (2009) 143-152 | La-Sr-Co-Fe-O3 | 1173     | 3.2                            | 1.0                      |                     | 8.4                  |                      | 37.0                  |                       |                     |                     |
| Appl Catal A 354 (2009) 143-152 | La-Sr-Co-Fe-O3 | 1173     | 2.4                            | 1.0                      |                     | 11.5                 |                      | 26.8                  |                       |                     |                     |
| Appl Catal A 354 (2009) 143-152 | La-Sr-Co-Fe-O3 | 1173     | 2.1                            | 1.0                      |                     | 13.5                 |                      | 21.5                  |                       |                     |                     |
| Catal Commu 10 (2009) 807-810   | SrCO3/Sm2O3    | 473      | 2.5                            | 1.0                      |                     | 34.9                 | 64.3                 | 19.7                  | 16.0                  | 35.7                | 12.5                |
| Catal Commu 10 (2009) 807-810   | SrCO3/Sm2O3    | 473      | 2.5                            | 1.0                      |                     | 35.0                 | 63.9                 | 18.5                  | 17.6                  | 36.1                | 12.6                |
| Catal Commu 10 (2009) 807-810   | SrCO3/Sm2O3    | 473      | 2.5                            | 1.0                      |                     | 37.4                 | 60.4                 | 21.9                  | 17.7                  | 39.6                | 14.8                |
| Catal Commu 10 (2009) 807-810   | SrCO3/Sm2O3    | 473      | 2.5                            | 1.0                      |                     | 30.7                 | 70.0                 | 15.5                  | 14.5                  | 30.0                | 9.2                 |
| Catal Commu 10 (2009) 807-810   | Sm2O3          | 473      | 2.5                            | 1.0                      |                     | 29.3                 | 75.5                 | 10.8                  | 13.7                  | 24.5                | 7.2                 |
| Catal Lett 129 (2009) 156-162   | ZrO2           | 873      | 2.0                            | 1.0                      |                     | 23.6                 | 73.2                 | 15.1                  | 11.7                  | 26.8                | 6.3                 |
| Catal Lett 129 (2009) 156-162   | BaCO3/ZrO2     | 623      | 2.0                            | 1.0                      |                     | 38.2                 | 72.4                 | 17.8                  | 9.8                   | 27.6                | 10.5                |

**Table S1: Database with catalyst composition and their performance in OCM reaction under different conditions.**

| Reference                        | Catalyst          | Temp., K | $p(\text{CH}_4)/p(\text{O}_2)$ | $p_{\text{total}}$ , bar | $X(\text{O}_2)$ , % | $X(\text{CH}_4)$ , % | $S(\text{CO}_x)$ , % | $S(\text{C}_2^-)$ , % | $S(\text{C}_2^-)$ , % | $S(\text{C}_2)$ , % | $Y(\text{C}_2)$ , % |
|----------------------------------|-------------------|----------|--------------------------------|--------------------------|---------------------|----------------------|----------------------|-----------------------|-----------------------|---------------------|---------------------|
| Catal Lett 129 (2009) 156-162    | BaCO3/ZrO2        | 623      | 2.0                            | 1.0                      |                     | 38.5                 | 70.3                 | 18.9                  | 10.8                  | 29.7                | 11.4                |
| Catal Lett 129 (2009) 156-162    | BaCO3/ZrO2        | 623      | 2.0                            | 1.0                      |                     | 39.2                 | 69.9                 | 19.8                  | 10.3                  | 30.1                | 11.8                |
| Catal Lett 129 (2009) 156-162    | BaCO3/ZrO2        | 623      | 2.0                            | 1.0                      |                     | 36.1                 | 68.5                 | 20.2                  | 11.3                  | 31.5                | 11.4                |
| Catal Lett 129 (2009) 156-162    | BaCO3/ZrO2        | 623      | 2.0                            | 1.0                      |                     | 32.7                 | 67.8                 | 20.9                  | 11.3                  | 32.2                | 10.5                |
| Catal Lett 129 (2009) 156-162    | BaCO3             | 1023     | 2.0                            | 1.0                      |                     | 4.9                  | 48.9                 | 13.7                  | 37.4                  | 51.1                | 2.5                 |
| Catal Lett 129 (2009) 156-162    | BaCO3/ZrO2        | 723      | 2.0                            | 1.0                      |                     | 39.2                 | 69.9                 | 19.8                  | 10.3                  | 30.1                | 11.8                |
| Catal Lett 129 (2009) 156-162    | BaCO3/ZrO2        | 723      | 2.5                            | 1.0                      |                     | 33.4                 | 67.3                 | 19.4                  | 13.3                  | 32.7                | 10.9                |
| Catal Lett 129 (2009) 156-162    | BaCO3/ZrO2        | 723      | 3.0                            | 1.0                      |                     | 28.7                 | 63.9                 | 18.9                  | 17.2                  | 36.1                | 10.4                |
| Catal Lett 131 (2009) 258-265    | ZnO with defects  | 973      | 4.0                            | 1.0                      | 100.0               | 18.0                 | 76.0                 |                       |                       | 24.0                | 4.3                 |
| Catal Lett 131 (2009) 258-265    | ZnO Commercial    | 973      | 4.0                            | 1.0                      | 100.0               | 17.5                 | 78.0                 |                       |                       | 22.0                | 3.9                 |
| Catal Lett 131 (2009) 258-265    | ZnO Calcinated    | 973      | 4.0                            | 1.0                      | 18.0                | 3.0                  | 79.0                 |                       |                       | 21.0                | 0.6                 |
| Catal Lett 131 (2009) 258-265    | Li@ZnO            | 973      | 4.0                            | 1.0                      | 22.0                | 3.5                  | 85.0                 |                       |                       | 15.0                | 0.5                 |
| Catal Lett 131 (2009) 258-265    | Li@ZnO            | 973      | 4.0                            | 1.0                      | 22.0                | 5.0                  | 65.0                 |                       |                       | 35.0                | 1.8                 |
| Catal Lett 131 (2009) 258-265    | Li@ZnO            | 973      | 4.0                            | 1.0                      | 43.0                | 6.0                  | 90.0                 |                       |                       | 10.0                | 0.6                 |
| Catal Lett 131 (2009) 258-265    | Li-ZnO            | 973      | 4.0                            | 1.0                      | 60.0                | 9.0                  | 80.0                 |                       |                       | 20.0                | 1.8                 |
| Catal Lett 131 (2009) 258-265    | Li-ZnO            | 973      | 4.0                            | 1.0                      | 50.0                | 8.0                  | 75.0                 |                       |                       | 25.0                | 2.0                 |
| Catal Lett 131 (2009) 258-265    | Li-ZnO            | 973      | 4.0                            | 1.0                      | 22.0                | 6.0                  | 55.0                 |                       |                       | 45.0                | 2.7                 |
| Catalysis Today 142 (2009) 34-41 | LaSr/CaO on BSCFO | 1073     | 1.0                            | 1.0                      |                     | 25.0                 | 57.0                 |                       |                       | 43.0                | 10.8                |
| Catalysis Today 142 (2009) 34-41 | LaSr/CaO on BSCFO | 1123     | 1.0                            | 1.0                      |                     | 22.0                 | 45.0                 |                       |                       | 55.0                | 12.1                |
| Catalysis Today 142 (2009) 34-41 | LaSr/CaO on BSCFO | 1173     | 1.0                            | 1.0                      |                     | 23.0                 | 37.0                 |                       |                       | 63.0                | 14.5                |
| Catalysis Today 142 (2009) 34-41 | LaSr/CaO on BSCFO | 1223     | 1.0                            | 1.0                      |                     | 26.0                 | 36.0                 |                       |                       | 64.0                | 16.6                |
| Catalysis Today 142 (2009) 34-41 | LaSr/CaO on BSCFO | 1273     | 1.0                            | 1.0                      |                     | 32.0                 | 42.0                 |                       |                       | 58.0                | 18.6                |
| Catalysis Today 142 (2009) 34-41 | LaSr/CaO on BSCFO | 1073     | 1.7                            | 1.0                      |                     | 23.0                 | 51.0                 |                       |                       | 49.0                | 11.3                |
| Catalysis Today 142 (2009) 34-41 | LaSr/CaO on BSCFO | 1123     | 1.7                            | 1.0                      |                     | 24.0                 | 46.0                 |                       |                       | 54.0                | 13.0                |
| Catalysis Today 142 (2009) 34-41 | LaSr/CaO on BSCFO | 1173     | 1.7                            | 1.0                      |                     | 24.0                 | 35.0                 |                       |                       | 65.0                | 15.6                |
| Catalysis Today 142 (2009) 34-41 | LaSr/CaO on BSCFO | 1223     | 1.7                            | 1.0                      |                     | 26.0                 | 39.0                 |                       |                       | 61.0                | 15.9                |
| Catalysis Today 142 (2009) 34-41 | LaSr/CaO on BSCFO | 1273     | 1.7                            | 1.0                      |                     | 27.0                 | 50.0                 |                       |                       | 50.0                | 13.5                |
| Catalysis Today 142 (2009) 34-41 | LaSr/CaO on BSCFO | 1073     | 3.1                            | 1.0                      |                     | 25.0                 | 49.0                 |                       |                       | 51.0                | 12.8                |
| Catalysis Today 142 (2009) 34-41 | LaSr/CaO on BSCFO | 1123     | 3.1                            | 1.0                      |                     | 24.0                 | 33.0                 |                       |                       | 67.0                | 16.1                |
| Catalysis Today 142 (2009) 34-41 | LaSr/CaO on BSCFO | 1173     | 3.1                            | 1.0                      |                     | 25.0                 | 30.0                 |                       |                       | 70.0                | 17.5                |
| Catalysis Today 142 (2009) 34-41 | LaSr/CaO on BSCFO | 1223     | 3.1                            | 1.0                      |                     | 28.0                 | 34.0                 |                       |                       | 66.0                | 18.5                |
| Catalysis Today 142 (2009) 34-41 | LaSr/CaO on BSCFO | 1273     | 3.1                            | 1.0                      |                     | 30.0                 | 47.0                 |                       |                       | 53.0                | 15.9                |
| Catalysis Today 145 (2009) 45-54 | Li/MgO            | 1073     | 4.0                            | 1.0                      | 80.5                | 19.1                 | 44.5                 |                       |                       | 55.5                | 10.6                |
| Catalysis Today 145 (2009) 45-54 | Na/MgO            | 1073     | 4.0                            | 1.0                      | 81.1                | 27.1                 | 48.0                 |                       |                       | 52.0                | 14.1                |
| Catalysis Today 145 (2009) 45-54 | Na/CaO            | 1073     | 4.0                            | 1.0                      | 94.8                | 25.0                 | 56.4                 |                       |                       | 43.6                | 10.9                |
| Catalysis Today 145 (2009) 45-54 | Na/CaO            | 1073     | 4.0                            | 1.0                      | 95.0                | 24.8                 | 54.0                 |                       |                       | 46.0                | 11.4                |
| Catalysis Today 145 (2009) 45-54 | Li/La2O3          | 1073     | 4.0                            | 1.0                      | 82.1                | 24.1                 | 45.6                 |                       |                       | 54.4                | 13.1                |
| Catalysis Today 145 (2009) 45-54 | Li/La2O3-MgO      | 1073     | 4.0                            | 1.0                      | 92.4                | 28.5                 | 47.0                 |                       |                       | 53.0                | 15.1                |
| Catalysis Today 145 (2009) 45-54 | Li/NiO-TiO2       | 1073     | 4.0                            | 1.0                      | 67.0                | 23.8                 | 54.2                 |                       |                       | 45.8                | 10.9                |
| Catalysis Today 145 (2009) 45-54 | Na/NiO-TiO2       | 1073     | 4.0                            | 1.0                      | 60.3                | 15.3                 | 52.4                 |                       |                       | 47.6                | 7.3                 |
| Catalysis Today 145 (2009) 45-54 | Li/MgO            | 1073     | 4.0                            | 1.0                      | 72.4                | 2.1                  | 27.6                 |                       |                       | 72.4                | 1.5                 |
| Catalysis Today 145 (2009) 45-54 | Li/La2O3          | 1073     | 4.0                            | 1.0                      | 59.9                | 22.2                 | 40.1                 |                       |                       | 59.9                | 13.3                |
| Catalysis Today 145 (2009) 45-54 | Li/La2O3-MgO      | 1073     | 4.0                            | 1.0                      | 88.0                | 25.8                 | 35.7                 |                       |                       | 64.3                | 16.6                |

**Table S1: Database with catalyst composition and their performance in OCM reaction under different conditions.**

| Reference                           | Catalyst       | Temp., K | $p(\text{CH}_4)/p(\text{O}_2)$ | $p_{\text{total}}$ , bar | $X(\text{O}_2)$ , % | $X(\text{CH}_4)$ , % | $S(\text{CO}_x)$ , % | $S(\text{C}_2^-)$ , % | $S(\text{C}_2^-)$ , % | $S(\text{C}_2)$ , % | $Y(\text{C}_2)$ , % |
|-------------------------------------|----------------|----------|--------------------------------|--------------------------|---------------------|----------------------|----------------------|-----------------------|-----------------------|---------------------|---------------------|
| Chem Eng Journal 148 (2009) 525-532 | Na-W-Mn/BCGCF  | 1123     | 3.0                            |                          |                     | 51.6                 | 32.6                 | 33.7                  | 33.7                  | 67.4                | 34.8                |
| Energy Fuels 23 (2009) 613-616      | La2O3          | 1023     | 10.0                           | 1.0                      | 32.2                |                      | 35.1                 |                       |                       | 64.9                |                     |
| Energy Fuels 23 (2009) 613-616      | La-FeO3        | 1023     | 10.0                           | 1.0                      | 86.5                |                      | 97.9                 |                       |                       | 2.1                 |                     |
| Energy Fuels 23 (2009) 613-616      | La-CoO3        | 1023     | 10.0                           | 1.0                      | 86.0                |                      | 99.6                 |                       |                       | 0.4                 |                     |
| Energy Fuels 23 (2009) 613-616      | La-MnO3        | 1023     | 10.0                           | 1.0                      | 83.0                |                      | 99.4                 |                       |                       | 0.6                 |                     |
| Energy Fuels 23 (2009) 613-616      | La-CrO3        | 1023     | 10.0                           | 1.0                      | 76.3                |                      | 100.0                |                       |                       | 0.0                 |                     |
| Energy Fuels 23 (2009) 613-616      | La-NiO         | 1023     | 10.0                           | 1.0                      | 7.2                 |                      | 100.0                |                       |                       | 0.0                 |                     |
| Energy Fuels 23 (2009) 613-616      | La-FeO3        | 1023     | 10.0                           | 1.0                      | 85.7                |                      | 61.5                 |                       |                       | 38.5                |                     |
| Energy Fuels 23 (2009) 613-616      | La-CoO3        | 1023     | 10.0                           | 1.0                      | 86.8                |                      | 96.6                 |                       |                       | 3.4                 |                     |
| Energy Fuels 23 (2009) 613-616      | La-MnO3        | 1023     | 10.0                           | 1.0                      | 90.6                |                      | 87.7                 |                       |                       | 12.3                |                     |
| Energy Fuels 23 (2009) 613-616      | La-CrO3        | 1023     | 10.0                           | 1.0                      | 89.7                |                      | 98.6                 |                       |                       | 1.4                 |                     |
| Energy Fuels 23 (2009) 613-616      | La-NiO         | 1023     | 10.0                           | 1.0                      | 96.2                |                      | 99.4                 |                       |                       | 0.6                 |                     |
| Fuel Proc Techn 90 (2009) 403-410   | Na2WO4/Mn/SiO2 | 1048     | 7.5                            | 1.0                      |                     | 11.0                 | 29.0                 | 30.0                  | 41.0                  | 71.0                | 7.8                 |
| Fuel Proc Techn 90 (2009) 403-410   | Na2WO4/Mn/SiO2 | 1073     | 7.5                            | 1.0                      |                     | 13.0                 | 24.0                 | 36.0                  | 40.0                  | 76.0                | 9.9                 |
| Fuel Proc Techn 90 (2009) 403-410   | Na2WO4/Mn/SiO2 | 1098     | 7.5                            | 1.0                      |                     | 13.5                 | 25.0                 | 40.0                  | 35.0                  | 75.0                | 10.1                |
| Fuel Proc Techn 90 (2009) 403-410   | Na2WO4/Mn/SiO2 | 1123     | 7.5                            | 1.0                      |                     | 14.0                 | 24.0                 | 42.0                  | 34.0                  | 76.0                | 10.6                |
| Fuel Proc Techn 90 (2009) 403-410   | Na2WO4/Mn/SiO2 | 1148     | 7.5                            | 1.0                      |                     | 15.5                 | 34.0                 | 44.0                  | 22.0                  | 66.0                | 10.2                |
| Fuel Proc Techn 90 (2009) 403-410   | Na2WO4/Mn/SiO2 | 1073     | 3.0                            | 1.0                      |                     |                      | 40.0                 | 42.0                  | 18.0                  | 60.0                |                     |
| Fuel Proc Techn 90 (2009) 403-410   | Na2WO4/Mn/SiO2 | 1073     | 5.0                            | 1.0                      |                     |                      | 30.0                 | 40.0                  | 30.0                  | 70.0                |                     |
| Fuel Proc Techn 90 (2009) 403-410   | Na2WO4/Mn/SiO2 | 1073     | 6.0                            | 1.0                      |                     |                      | 25.0                 | 40.0                  | 35.0                  | 75.0                |                     |
| Fuel Proc Techn 90 (2009) 403-410   | Na2WO4/Mn/SiO2 | 1073     | 9.0                            | 1.0                      |                     |                      | 16.0                 | 42.5                  | 41.5                  | 84.0                |                     |
| Ind Eng Chem Res 48 (2009) 641-646  | Nd-Sr-Fe-Ce    | 973      | 2.5                            | 1.0                      |                     | 12.9                 | 96.4                 | 0.4                   | 3.2                   | 3.6                 | 0.5                 |
| Ind Eng Chem Res 48 (2009) 641-646  | Gd-Sr-Fe-Ce    | 973      | 2.5                            | 1.0                      |                     | 11.1                 | 96.3                 | 0.4                   | 3.3                   | 3.7                 | 0.4                 |
| Ind Eng Chem Res 48 (2009) 641-646  | Pr-Sr-Fe-Ce    | 973      | 2.5                            | 1.0                      |                     | 12.3                 | 94.5                 | 0.8                   | 4.8                   | 5.6                 | 0.7                 |
| Ind Eng Chem Res 48 (2009) 641-646  | Sm-Sr-Fe-Ce    | 973      | 2.5                            | 1.0                      |                     | 11.5                 | 94.8                 | 0.8                   | 4.4                   | 5.2                 | 0.6                 |
| Ind Eng Chem Res 48 (2009) 641-646  | La-Sr-Fe-Ce    | 973      | 2.5                            | 1.0                      |                     | 11.8                 | 96.8                 | 0.4                   | 2.9                   | 3.2                 | 0.4                 |
| Ind Eng Chem Res 48 (2009) 641-646  | La-Sr-Mn       | 973      | 2.5                            | 1.0                      |                     | 11.8                 | 98.9                 | 0.0                   | 1.2                   | 1.2                 | 0.1                 |
| Ind Eng Chem Res 48 (2009) 641-646  | La-Sr-Cr       | 973      | 2.5                            | 1.0                      |                     | 11.2                 | 99.7                 | 0.0                   | 0.3                   | 0.3                 | 0.0                 |
| Ind Eng Chem Res 48 (2009) 641-646  | La-Na-Mn       | 973      | 2.5                            | 1.0                      |                     | 9.4                  | 81.9                 | 3.3                   | 14.8                  | 18.1                | 1.7                 |
| Ind Eng Chem Res 48 (2009) 641-646  | Gd-Na-Mn       | 973      | 2.5                            | 1.0                      |                     | 4.7                  | 78.0                 | 6.8                   | 15.2                  | 22.0                | 1.0                 |
| Ind Eng Chem Res 48 (2009) 641-646  | Sm-Na-Mn       | 973      | 2.5                            | 1.0                      |                     | 6.0                  | 53.6                 | 20.5                  | 25.9                  | 46.4                | 2.8                 |
| Ind Eng Chem Res 48 (2009) 641-646  | Na-La-Co       | 973      | 2.5                            | 1.0                      |                     | 3.4                  | 53.8                 | 11.2                  | 35.0                  | 46.2                | 1.6                 |
| Ind Eng Chem Res 48 (2009) 641-646  | Na-Gd-Co       | 973      | 2.5                            | 1.0                      |                     | 5.7                  | 52.7                 | 17.6                  | 29.7                  | 47.3                | 2.7                 |
| Ind Eng Chem Res 48 (2009) 641-646  | Na-Sm-Co       | 973      | 2.5                            | 1.0                      |                     | 3.3                  | 76.4                 | 4.1                   | 19.5                  | 23.6                | 0.8                 |
| Ind Eng Chem Res 48 (2009) 641-646  | Nd-Sr-Fe-Ce    | 993      | 2.5                            | 1.0                      |                     | 13.1                 | 95.2                 | 0.7                   | 4.1                   | 4.8                 | 0.6                 |
| Ind Eng Chem Res 48 (2009) 641-646  | Gd-Sr-Fe-Ce    | 993      | 2.5                            | 1.0                      |                     | 11.9                 | 94.6                 | 0.8                   | 4.6                   | 5.4                 | 0.6                 |
| Ind Eng Chem Res 48 (2009) 641-646  | Pr-Sr-Fe-Ce    | 993      | 2.5                            | 1.0                      |                     | 12.4                 | 93.6                 | 1.0                   | 5.4                   | 6.4                 | 0.8                 |
| Ind Eng Chem Res 48 (2009) 641-646  | Sm-Sr-Fe-Ce    | 993      | 2.5                            | 1.0                      |                     | 12.3                 | 93.9                 | 1.0                   | 5.1                   | 6.1                 | 0.7                 |
| Ind Eng Chem Res 48 (2009) 641-646  | La-Sr-Fe-Ce    | 993      | 2.5                            | 1.0                      |                     | 12.1                 | 95.3                 | 0.7                   | 4.0                   | 4.7                 | 0.6                 |
| Ind Eng Chem Res 48 (2009) 641-646  | La-Sr-Mn       | 993      | 2.5                            | 1.0                      |                     | 11.9                 | 98.2                 | 0.1                   | 1.7                   | 1.8                 | 0.2                 |
| Ind Eng Chem Res 48 (2009) 641-646  | La-Sr-Cr       | 993      | 2.5                            | 1.0                      |                     | 11.6                 | 99.5                 | 0.0                   | 0.5                   | 0.5                 | 0.1                 |
| Ind Eng Chem Res 48 (2009) 641-646  | La-Na-Mn       | 993      | 2.5                            | 1.0                      |                     | 10.3                 | 74.5                 | 6.8                   | 18.7                  | 25.5                | 2.6                 |
| Ind Eng Chem Res 48 (2009) 641-646  | Gd-Na-Mn       | 993      | 2.5                            | 1.0                      |                     | 6.5                  | 73.3                 | 8.9                   | 17.8                  | 26.7                | 1.7                 |

**Table S1: Database with catalyst composition and their performance in OCM reaction under different conditions.**

| Reference                          | Catalyst    | Temp., K | $p(\text{CH}_4)/p(\text{O}_2)$ | $p_{\text{total}}$ , bar | $X(\text{O}_2)$ , % | $X(\text{CH}_4)$ , % | $S(\text{CO}_x)$ , % | $S(\text{C}_2^-)$ , % | $S(\text{C}_2^-)$ , % | $S(\text{C}_2)$ , % | $Y(\text{C}_2)$ , % |
|------------------------------------|-------------|----------|--------------------------------|--------------------------|---------------------|----------------------|----------------------|-----------------------|-----------------------|---------------------|---------------------|
| Ind Eng Chem Res 48 (2009) 641-646 | Sm-Na-Mn    | 993      | 2.5                            | 1.0                      |                     | 9.5                  | 48.0                 | 25.4                  | 26.6                  | 52.0                | 4.9                 |
| Ind Eng Chem Res 48 (2009) 641-646 | Na-La-Co    | 993      | 2.5                            | 1.0                      |                     | 5.1                  | 47.1                 | 17.3                  | 35.6                  | 52.9                | 2.7                 |
| Ind Eng Chem Res 48 (2009) 641-646 | Na-Gd-Co    | 993      | 2.5                            | 1.0                      |                     | 6.8                  | 47.0                 | 21.7                  | 31.3                  | 53.0                | 3.6                 |
| Ind Eng Chem Res 48 (2009) 641-646 | Na-Sm-Co    | 993      | 2.5                            | 1.0                      |                     | 4.6                  | 67.5                 | 8.1                   | 24.4                  | 32.5                | 1.5                 |
| Ind Eng Chem Res 48 (2009) 641-646 | Nd-Sr-Fe-Ce | 1013     | 2.5                            | 1.0                      |                     | 14.3                 | 94.1                 | 1.0                   | 4.9                   | 5.9                 | 0.8                 |
| Ind Eng Chem Res 48 (2009) 641-646 | Gd-Sr-Fe-Ce | 1013     | 2.5                            | 1.0                      |                     | 13.4                 | 93.3                 | 1.3                   | 5.4                   | 6.8                 | 0.9                 |
| Ind Eng Chem Res 48 (2009) 641-646 | Pr-Sr-Fe-Ce | 1013     | 2.5                            | 1.0                      |                     | 13.0                 | 92.7                 | 1.4                   | 6.0                   | 7.3                 | 1.0                 |
| Ind Eng Chem Res 48 (2009) 641-646 | Sm-Sr-Fe-Ce | 1013     | 2.5                            | 1.0                      |                     | 12.4                 | 91.2                 | 1.8                   | 7.0                   | 8.8                 | 1.1                 |
| Ind Eng Chem Res 48 (2009) 641-646 | La-Sr-Fe-Ce | 1013     | 2.5                            | 1.0                      |                     | 12.6                 | 94.1                 | 1.1                   | 4.8                   | 5.9                 | 0.7                 |
| Ind Eng Chem Res 48 (2009) 641-646 | La-Sr-Mn    | 1013     | 2.5                            | 1.0                      |                     | 12.2                 | 97.3                 | 0.3                   | 2.4                   | 2.7                 | 0.3                 |
| Ind Eng Chem Res 48 (2009) 641-646 | La-Sr-Cr    | 1013     | 2.5                            | 1.0                      |                     | 12.4                 | 99.3                 | 0.0                   | 0.7                   | 0.7                 | 0.1                 |
| Ind Eng Chem Res 48 (2009) 641-646 | La-Na-Mn    | 1013     | 2.5                            | 1.0                      |                     | 11.5                 | 70.5                 | 9.1                   | 20.4                  | 29.5                | 3.4                 |
| Ind Eng Chem Res 48 (2009) 641-646 | Gd-Na-Mn    | 1013     | 2.5                            | 1.0                      |                     | 9.3                  | 68.6                 | 12.2                  | 19.2                  | 31.4                | 2.9                 |
| Ind Eng Chem Res 48 (2009) 641-646 | Sm-Na-Mn    | 1013     | 2.5                            | 1.0                      |                     | 11.2                 | 45.5                 | 31.8                  | 22.7                  | 54.5                | 6.1                 |
| Ind Eng Chem Res 48 (2009) 641-646 | Na-La-Co    | 1013     | 2.5                            | 1.0                      |                     | 7.0                  | 41.2                 | 25.0                  | 33.8                  | 58.8                | 4.1                 |
| Ind Eng Chem Res 48 (2009) 641-646 | Na-Gd-Co    | 1013     | 2.5                            | 1.0                      |                     | 9.1                  | 41.6                 | 29.4                  | 29.0                  | 58.4                | 5.3                 |
| Ind Eng Chem Res 48 (2009) 641-646 | Na-Sm-Co    | 1013     | 2.5                            | 1.0                      |                     | 7.8                  | 59.4                 | 14.8                  | 25.8                  | 40.6                | 3.2                 |
| Ind Eng Chem Res 48 (2009) 641-646 | Nd-Sr-Fe-Ce | 1033     | 2.5                            | 1.0                      |                     | 14.9                 | 92.8                 | 1.5                   | 5.7                   | 7.2                 | 1.1                 |
| Ind Eng Chem Res 48 (2009) 641-646 | Gd-Sr-Fe-Ce | 1033     | 2.5                            | 1.0                      |                     | 14.6                 | 91.3                 | 2.0                   | 6.6                   | 8.7                 | 1.3                 |
| Ind Eng Chem Res 48 (2009) 641-646 | Pr-Sr-Fe-Ce | 1033     | 2.5                            | 1.0                      |                     | 13.5                 | 91.0                 | 2.1                   | 6.9                   | 9.0                 | 1.2                 |
| Ind Eng Chem Res 48 (2009) 641-646 | Sm-Sr-Fe-Ce | 1033     | 2.5                            | 1.0                      |                     | 13.0                 | 88.3                 | 3.7                   | 8.0                   | 11.7                | 1.5                 |
| Ind Eng Chem Res 48 (2009) 641-646 | La-Sr-Fe-Ce | 1033     | 2.5                            | 1.0                      |                     | 13.6                 | 92.7                 | 1.7                   | 5.6                   | 7.3                 | 1.0                 |
| Ind Eng Chem Res 48 (2009) 641-646 | La-Sr-Mn    | 1033     | 2.5                            | 1.0                      |                     | 13.0                 | 96.2                 | 0.8                   | 3.1                   | 3.8                 | 0.5                 |
| Ind Eng Chem Res 48 (2009) 641-646 | La-Sr-Cr    | 1033     | 2.5                            | 1.0                      |                     | 12.6                 | 98.6                 | 0.2                   | 1.2                   | 1.4                 | 0.2                 |
| Ind Eng Chem Res 48 (2009) 641-646 | La-Na-Mn    | 1033     | 2.5                            | 1.0                      |                     | 14.2                 | 57.3                 | 15.8                  | 26.9                  | 42.7                | 6.1                 |
| Ind Eng Chem Res 48 (2009) 641-646 | Gd-Na-Mn    | 1033     | 2.5                            | 1.0                      |                     | 10.7                 | 67.5                 | 14.0                  | 18.5                  | 32.5                | 3.5                 |
| Ind Eng Chem Res 48 (2009) 641-646 | Sm-Na-Mn    | 1033     | 2.5                            | 1.0                      |                     | 15.5                 | 43.8                 | 34.8                  | 21.4                  | 56.2                | 8.7                 |
| Ind Eng Chem Res 48 (2009) 641-646 | Na-La-Co    | 1033     | 2.5                            | 1.0                      |                     | 9.1                  | 35.4                 | 34.6                  | 30.0                  | 64.6                | 5.9                 |
| Ind Eng Chem Res 48 (2009) 641-646 | Na-Gd-Co    | 1033     | 2.5                            | 1.0                      |                     | 13.7                 | 38.7                 | 34.3                  | 27.0                  | 61.3                | 8.4                 |
| Ind Eng Chem Res 48 (2009) 641-646 | Na-Sm-Co    | 1033     | 2.5                            | 1.0                      |                     | 9.5                  | 54.4                 | 22.0                  | 23.6                  | 45.6                | 4.3                 |
| Ind Eng Chem Res 48 (2009) 641-646 | Nd-Sr-Fe-Ce | 1053     | 2.5                            | 1.0                      |                     | 15.3                 | 90.9                 | 2.2                   | 6.9                   | 9.1                 | 1.4                 |
| Ind Eng Chem Res 48 (2009) 641-646 | Gd-Sr-Fe-Ce | 1053     | 2.5                            | 1.0                      |                     | 15.5                 | 89.3                 | 2.9                   | 7.8                   | 10.8                | 1.7                 |
| Ind Eng Chem Res 48 (2009) 641-646 | Pr-Sr-Fe-Ce | 1053     | 2.5                            | 1.0                      |                     | 14.3                 | 88.7                 | 3.1                   | 8.2                   | 11.3                | 1.6                 |
| Ind Eng Chem Res 48 (2009) 641-646 | Sm-Sr-Fe-Ce | 1053     | 2.5                            | 1.0                      |                     | 14.5                 | 82.9                 | 6.0                   | 11.2                  | 17.1                | 2.5                 |
| Ind Eng Chem Res 48 (2009) 641-646 | La-Sr-Fe-Ce | 1053     | 2.5                            | 1.0                      |                     | 13.8                 | 91.0                 | 2.7                   | 6.3                   | 9.0                 | 1.2                 |
| Ind Eng Chem Res 48 (2009) 641-646 | La-Sr-Mn    | 1053     | 2.5                            | 1.0                      |                     | 13.9                 | 94.6                 | 1.3                   | 4.1                   | 5.4                 | 0.7                 |
| Ind Eng Chem Res 48 (2009) 641-646 | La-Sr-Cr    | 1053     | 2.5                            | 1.0                      |                     | 13.3                 | 97.9                 | 0.4                   | 1.7                   | 2.1                 | 0.3                 |
| Ind Eng Chem Res 48 (2009) 641-646 | La-Na-Mn    | 1053     | 2.5                            | 1.0                      |                     | 15.1                 | 52.9                 | 21.7                  | 25.4                  | 47.1                | 7.1                 |
| Ind Eng Chem Res 48 (2009) 641-646 | Gd-Na-Mn    | 1053     | 2.5                            | 1.0                      |                     | 11.3                 | 64.1                 | 18.1                  | 17.8                  | 35.9                | 4.1                 |
| Ind Eng Chem Res 48 (2009) 641-646 | Sm-Na-Mn    | 1053     | 2.5                            | 1.0                      |                     | 17.2                 | 42.5                 | 39.1                  | 18.4                  | 57.5                | 9.9                 |
| Ind Eng Chem Res 48 (2009) 641-646 | Na-La-Co    | 1053     | 2.5                            | 1.0                      |                     | 11.9                 | 31.6                 | 41.1                  | 27.3                  | 68.4                | 8.1                 |
| Ind Eng Chem Res 48 (2009) 641-646 | Na-Gd-Co    | 1053     | 2.5                            | 1.0                      |                     | 17.0                 | 36.0                 | 38.3                  | 25.7                  | 64.0                | 10.9                |
| Ind Eng Chem Res 48 (2009) 641-646 | Na-Sm-Co    | 1053     | 2.5                            | 1.0                      |                     | 13.2                 | 45.4                 | 27.6                  | 27.0                  | 54.6                | 7.2                 |



**Table S1: Database with catalyst composition and their performance in OCM reaction under different conditions.**

| Reference                            | Catalyst       | Temp., K | $p(\text{CH}_4)/p(\text{O}_2)$ | $p_{\text{total}}$ , bar | $X(\text{O}_2)$ , % | $X(\text{CH}_4)$ , % | $S(\text{CO}_x)$ , % | $S(\text{C}_2^-)$ , % | $S(\text{C}_2^-)$ , % | $S(\text{C}_2)$ , % | $Y(\text{C}_2)$ , % |
|--------------------------------------|----------------|----------|--------------------------------|--------------------------|---------------------|----------------------|----------------------|-----------------------|-----------------------|---------------------|---------------------|
| Mendelev Comm 19 (2009) 337-339      | Na2WO4/Mn/SiO2 | 973      | 7.4                            | 1.0                      | 33.5                | 3.0                  | 67.7                 | 11.1                  | 21.2                  | 32.3                | 1.0                 |
| Mendelev Comm 19 (2009) 337-339      | Na2WO4/Mn/SiO2 | 1023     | 7.4                            | 1.0                      | 66.4                | 7.9                  | 44.1                 | 33.1                  | 22.8                  | 55.9                | 4.4                 |
| Mendelev Comm 19 (2009) 337-339      | Na2WO4/Mn/SiO2 | 1073     | 7.4                            | 1.0                      | 91.2                | 12.2                 | 36.5                 | 46.1                  | 17.4                  | 63.5                | 7.8                 |
| AIChE Journal 56 (2010) 717          | MgLi/Al2O3     | 1023     | 1.6                            | 1.0                      |                     | 19.0                 |                      |                       |                       | 40.0                | 7.6                 |
| AIChE Journal 56 (2010) 717          | MgLi/Al2O3     | 1023     | 1.6                            | 1.0                      |                     | 15.0                 |                      |                       |                       | 34.0                | 5.1                 |
| AIChE Journal 56 (2010) 717          | MgLi/Al2O3     | 1023     | 1.6                            | 1.0                      |                     | 38.0                 |                      |                       |                       | 66.0                | 25.1                |
| AIChE Journal 56 (2010) 717          | MgLi/Al2O3     | 1023     | 1.6                            | 1.0                      |                     | 36.0                 |                      |                       |                       | 63.0                | 22.7                |
| Appl Catal A 375(2010) 172-178       | BeO-Nd2O3      | 1048     | 5.0                            | 1.0                      |                     | 21.3                 | 59.3                 |                       |                       | 40.7                | 8.6                 |
| Appl Catal A 375(2010) 172-178       | MgO-Nd2O3      | 1048     | 5.0                            | 1.0                      |                     | 21.4                 | 51.3                 |                       |                       | 48.7                | 10.4                |
| Appl Catal A 375(2010) 172-178       | CaO-Nd2O3      | 1048     | 5.0                            | 1.0                      |                     | 23.1                 | 48.0                 |                       |                       | 52.0                | 11.8                |
| Appl Catal A 375(2010) 172-178       | SrO-Nd2O3      | 1048     | 5.0                            | 1.0                      |                     | 20.4                 | 50.8                 |                       |                       | 49.2                | 10.2                |
| Catal Lett 135 (2010) 26-32          | Li/MgO         | 973      | 5.0                            | 1.0                      |                     | 5.5                  | 63.5                 |                       |                       | 36.5                | 2.0                 |
| Catal Lett 135 (2010) 26-32          | Li/MgO         | 1023     | 5.0                            | 1.0                      |                     | 11.2                 | 52.5                 |                       |                       | 47.5                | 5.3                 |
| Catal Lett 135 (2010) 26-32          | Li/MgO         | 1073     | 5.0                            | 1.0                      |                     | 17.0                 | 44.0                 |                       |                       | 56.0                | 9.5                 |
| Catal Lett 135 (2010) 26-32          | Na/MgO         | 973      | 5.0                            | 1.0                      |                     | 1.0                  | 68.0                 |                       |                       | 32.0                | 0.3                 |
| Catal Lett 135 (2010) 26-32          | Na/MgO         | 1023     | 5.0                            | 1.0                      |                     | 3.5                  | 60.0                 |                       |                       | 40.0                | 1.4                 |
| Catal Lett 135 (2010) 26-32          | Na/MgO         | 1073     | 5.0                            | 1.0                      |                     | 10.0                 | 56.0                 |                       |                       | 44.0                | 4.4                 |
| Catal Lett 135 (2010) 26-32          | Li/Ce/MgO      | 973      | 5.0                            | 1.0                      |                     | 7.0                  | 46.0                 |                       |                       | 54.0                | 3.8                 |
| Catal Lett 135 (2010) 26-32          | Li/Ce/MgO      | 1023     | 5.0                            | 1.0                      |                     | 13.0                 | 42.0                 |                       |                       | 58.0                | 7.5                 |
| Catal Lett 135 (2010) 26-32          | Li/Ce/MgO      | 1073     | 5.0                            | 1.0                      |                     | 21.5                 | 36.0                 |                       |                       | 64.0                | 13.8                |
| Catal Lett 135 (2010) 26-32          | Na/Ce/MgO      | 973      | 5.0                            | 1.0                      |                     | 4.5                  | 80.0                 |                       |                       | 20.0                | 0.9                 |
| Catal Lett 135 (2010) 26-32          | Na/Ce/MgO      | 1023     | 5.0                            | 1.0                      |                     | 8.0                  | 57.0                 |                       |                       | 43.0                | 3.4                 |
| Catal Lett 135 (2010) 26-32          | Na/Ce/MgO      | 1073     | 5.0                            | 1.0                      |                     | 16.0                 | 52.0                 |                       |                       | 48.0                | 7.7                 |
| Ind Eng Chem Res 49 (2010) 2078-2083 | Na2WO4/Mn/SiO2 | 1073     | 2.5                            | 1.0                      | 100.0               | 31.2                 | 43.1                 | 17.3                  | 15.0                  | 32.3                | 10.1                |
| Ind Eng Chem Res 49 (2010) 2078-2083 | Na2WO4/Mn/SiO2 | 1073     | 2.5                            | 1.0                      | 100.0               | 30.7                 | 43.8                 | 43.4                  | 14.7                  | 58.1                | 17.8                |
| Inorg Chem 49 (2010) 10244-10246     | La2O3-SiO2     | 673      | 3.0                            | 1.0                      |                     | 5.4                  | 63.8                 | 18.3                  | 17.9                  | 36.2                | 2.0                 |
| Inorg Chem 49 (2010) 10244-10246     | La2O3-SiO2     | 723      | 3.0                            | 1.0                      |                     | 27.8                 | 57.3                 | 20.9                  | 21.8                  | 42.7                | 11.9                |
| Inorg Chem 49 (2010) 10244-10246     | La2O3-SiO2     | 773      | 3.0                            | 1.0                      |                     | 29.6                 | 54.6                 | 22.4                  | 23.0                  | 45.4                | 13.4                |
| Inorg Chem 49 (2010) 10244-10246     | La2O3-SiO2     | 823      | 3.0                            | 1.0                      |                     | 21.4                 | 53.5                 | 23.2                  | 23.3                  | 46.5                | 10.0                |
| Inorg Chem 49 (2010) 10244-10246     | La2O3-SiO2     | 873      | 3.0                            | 1.0                      |                     | 33.4                 | 49.6                 | 25.6                  | 24.8                  | 50.4                | 16.8                |
| J Ind and Eng Chem 16 (2010) 923-928 | W-Na-Mn/SiO2   | 1048     | 2.0                            | 1.0                      |                     | 46.1                 | 60.4                 | 28.3                  | 11.3                  | 39.6                | 18.3                |
| J Ind and Eng Chem 16 (2010) 923-928 | Mo-Na-Mn/SiO2  | 1048     | 2.0                            | 1.0                      |                     | 33.6                 | 62.8                 | 23.9                  | 13.3                  | 37.2                | 12.5                |
| J Ind and Eng Chem 16 (2010) 923-928 | Nb-Na-Mn/SiO2  | 1048     | 2.0                            | 1.0                      |                     | 39.3                 | 66.8                 | 23.4                  | 9.8                   | 33.2                | 13.0                |
| J Ind and Eng Chem 16 (2010) 923-928 | V-Na-Mn/SiO2   | 1048     | 2.0                            | 1.0                      |                     | 33.5                 | 92.0                 | 4.5                   | 3.5                   | 8.0                 | 2.7                 |
| J Ind and Eng Chem 16 (2010) 923-928 | Cr-Na-Mn/SiO2  | 1048     | 2.0                            | 1.0                      |                     | 40.1                 | 88.5                 | 6.7                   | 4.8                   | 11.5                | 4.6                 |
| J Nat Gas Chem 19 (2010) 25-30       | La2O3-CaO      | 1123     | 4.0                            | 1.0                      |                     | 25.9                 | 48.0                 | 30.3                  | 21.7                  | 52.0                | 13.5                |
| J Nat Gas Chem 19 (2010) 25-30       | La2O3-CaO      | 1123     | 4.0                            | 1.0                      |                     | 26.9                 | 43.6                 | 28.2                  | 28.2                  | 56.4                | 15.2                |
| J Nat Gas Chem 19 (2010) 25-30       | La2O3-CaO      | 1123     | 4.0                            | 1.0                      |                     | 26.9                 | 47.5                 | 31.5                  | 21.0                  | 52.5                | 14.1                |
| J Nat Gas Chem 19 (2010) 25-30       | La2O3-CaO      | 1123     | 8.0                            | 1.0                      |                     | 17.8                 | 30.3                 | 31.0                  | 38.7                  | 69.7                | 12.4                |
| J Nat Gas Chem 19 (2010) 25-30       | La2O3-CaO      | 1123     | 8.0                            | 1.0                      |                     | 19.7                 | 31.5                 | 28.2                  | 40.3                  | 68.5                | 13.5                |
| J Nat Gas Chem 19 (2010) 25-30       | La2O3-CaO      | 1123     | 8.0                            | 1.0                      |                     | 21.3                 | 40.9                 | 31.0                  | 28.1                  | 59.1                | 12.6                |
| J Nat Gas Chem 19 (2010) 25-30       | La2O3-CaO      | 1073     | 8.0                            | 1.0                      |                     | 18.6                 | 27.9                 | 29.7                  | 42.4                  | 72.1                | 13.4                |
| J Nat Gas Chem 19 (2010) 25-30       | La2O3-CaO      | 1073     | 8.0                            | 1.0                      |                     | 17.9                 | 29.7                 | 31.2                  | 39.1                  | 70.3                | 12.6                |

**Table S1: Database with catalyst composition and their performance in OCM reaction under different conditions.**

| Reference                      | Catalyst          | Temp., K | $p(\text{CH}_4)/p(\text{O}_2)$ | $p_{\text{total}}$ , bar | $X(\text{O}_2)$ , % | $X(\text{CH}_4)$ , % | $S(\text{CO}_x)$ , % | $S(\text{C}_2^-)$ , % | $S(\text{C}_2)$ , % | $S(\text{C}_2)$ , % | $Y(\text{C}_2)$ , % |
|--------------------------------|-------------------|----------|--------------------------------|--------------------------|---------------------|----------------------|----------------------|-----------------------|---------------------|---------------------|---------------------|
| J Nat Gas Chem 19 (2010) 25-30 | La2O3-CaO         | 1073     | 8.0                            | 1.0                      |                     | 16.7                 | 41.2                 | 24.2                  | 34.6                | 58.8                | 9.8                 |
| J Nat Gas Chem 19 (2010) 25-30 | La2O3-CaO         | 1023     | 4.0                            | 1.0                      |                     | 27.4                 | 43.3                 | 29.7                  | 27.0                | 56.7                | 15.5                |
| J Nat Gas Chem 19 (2010) 25-30 | La2O3-CaO         | 1023     | 4.0                            | 1.0                      |                     | 25.7                 | 44.4                 | 24.7                  | 30.9                | 55.6                | 14.3                |
| J Nat Gas Chem 19 (2010) 25-30 | La2O3-CaO         | 1023     | 4.0                            | 1.0                      |                     | 27.5                 | 46.0                 | 29.5                  | 24.5                | 54.0                | 14.9                |
| J Nat Gas Chem 19 (2010) 25-30 | La2O3-CaO         | 1073     | 4.0                            | 1.0                      |                     | 22.5                 | 46.6                 | 23.7                  | 29.7                | 53.4                | 12.0                |
| J Nat Gas Chem 19 (2010) 25-30 | La2O3-CaO         | 1073     | 4.0                            | 1.0                      |                     | 26.5                 | 42.8                 | 28.6                  | 28.6                | 57.2                | 15.2                |
| J Nat Gas Chem 19 (2010) 25-30 | La2O3-CaO         | 1073     | 8.0                            | 1.0                      |                     | 18.4                 | 33.0                 | 27.6                  | 39.4                | 67.0                | 12.3                |
| J Nat Gas Chem 19 (2010) 35-42 | WO3/SiO2          | 1073     | 5.0                            | 1.0                      |                     | 12.0                 | 41.0                 | 26.2                  | 32.8                | 59.0                | 7.1                 |
| J Nat Gas Chem 19 (2010) 35-42 | WO3/SiO2          | 1073     | 5.0                            | 1.0                      |                     | 11.0                 | 46.0                 | 24.0                  | 30.0                | 54.0                | 5.9                 |
| J Nat Gas Chem 19 (2010) 35-42 | Mn2O3/SiO2        | 1073     | 5.0                            | 1.0                      |                     | 17.0                 | 46.0                 | 27.0                  | 27.0                | 54.0                | 9.2                 |
| J Nat Gas Chem 19 (2010) 35-42 | Mn2O3/SiO2        | 1073     | 5.0                            | 1.0                      |                     | 19.0                 | 57.0                 | 23.5                  | 19.5                | 43.0                | 8.2                 |
| J Nat Gas Chem 19 (2010) 35-42 | CeO2/SiO2         | 1073     | 5.0                            | 1.0                      |                     | 22.0                 | 43.0                 | 38.6                  | 18.4                | 57.0                | 12.5                |
| J Nat Gas Chem 19 (2010) 35-42 | CeO2/SiO2         | 1073     | 5.0                            | 1.0                      |                     | 21.0                 | 46.0                 | 38.1                  | 15.9                | 54.0                | 11.3                |
| J Nat Gas Chem 19 (2010) 35-42 | Mn-W/SiO2         | 1073     | 5.0                            | 1.0                      |                     | 25.0                 | 52.0                 | 29.5                  | 18.5                | 48.0                | 12.0                |
| J Nat Gas Chem 19 (2010) 35-42 | Mn-W/SiO2         | 1073     | 5.0                            | 1.0                      |                     | 24.0                 | 52.0                 | 32.0                  | 16.0                | 48.0                | 11.5                |
| J Nat Gas Chem 19 (2010) 35-42 | Ce-W/SiO2         | 1073     | 5.0                            | 1.0                      |                     | 23.0                 | 57.0                 | 21.5                  | 21.5                | 43.0                | 9.9                 |
| J Nat Gas Chem 19 (2010) 35-42 | Ce-W/SiO2         | 1073     | 5.0                            | 1.0                      |                     | 20.0                 | 65.0                 | 18.3                  | 16.7                | 35.0                | 7.0                 |
| J Nat Gas Chem 19 (2010) 35-42 | Na-Mn/SiO2        | 1073     | 5.0                            | 1.0                      |                     | 26.0                 | 34.0                 | 45.4                  | 20.6                | 66.0                | 17.2                |
| J Nat Gas Chem 19 (2010) 35-42 | Na-Mn/SiO2        | 1073     | 5.0                            | 1.0                      |                     | 31.0                 | 56.0                 | 31.8                  | 12.2                | 44.0                | 13.6                |
| J Nat Gas Chem 19 (2010) 35-42 | Na-Ce/SiO2        | 1073     | 5.0                            | 1.0                      |                     | 19.0                 | 34.0                 | 33.0                  | 33.0                | 66.0                | 12.5                |
| J Nat Gas Chem 19 (2010) 35-42 | Na-Ce/SiO2        | 1073     | 5.0                            | 1.0                      |                     | 23.0                 | 46.0                 | 34.7                  | 19.3                | 54.0                | 12.4                |
| J Nat Gas Chem 19 (2010) 35-42 | Na2WO4/SiO2       | 1073     | 5.0                            | 1.0                      |                     | 21.0                 | 22.0                 | 44.1                  | 33.9                | 78.0                | 16.4                |
| J Nat Gas Chem 19 (2010) 35-42 | Na2WO4/SiO2       | 1073     | 5.0                            | 1.0                      |                     | 20.0                 | 26.0                 | 47.7                  | 26.3                | 74.0                | 14.8                |
| J Nat Gas Chem 19 (2010) 35-42 | Na2WO4/Mn/SiO2    | 1073     | 5.0                            | 1.0                      |                     | 33.0                 | 29.0                 | 51.3                  | 19.7                | 71.0                | 23.4                |
| J Nat Gas Chem 19 (2010) 35-42 | Na2WO4/Mn/SiO2    | 1073     | 5.0                            | 1.0                      |                     | 30.0                 | 33.0                 | 49.4                  | 17.6                | 67.0                | 20.1                |
| J Nat Gas Chem 19 (2010) 35-42 | Na2WO4/Ce/SiO2    | 1073     | 5.0                            | 1.0                      |                     | 31.0                 | 29.0                 | 50.1                  | 20.9                | 71.0                | 22.0                |
| J Nat Gas Chem 19 (2010) 35-42 | Na2WO4/Ce/SiO2    | 1073     | 5.0                            | 1.0                      |                     | 27.0                 | 26.0                 | 51.6                  | 22.4                | 74.0                | 20.0                |
| J Nat Gas Chem 19 (2010) 47-53 | Na2WO4/Mn/SiO2    | 1113     | 3.0                            | 1.0                      | 88.0                | 26.6                 | 48.1                 | 35.6                  | 16.3                | 51.9                | 13.8                |
| J Nat Gas Chem 19 (2010) 47-53 | Na2WO4/Mn/SiO2    | 1113     | 4.0                            | 1.0                      | 96.2                | 22.3                 | 34.2                 | 46.5                  | 19.3                | 65.8                | 14.7                |
| J Nat Gas Chem 19 (2010) 47-53 | Na2WO4/Mn/SiO2    | 1113     | 5.0                            | 1.0                      | 96.4                | 20.0                 | 36.9                 | 44.1                  | 19.0                | 63.1                | 12.6                |
| J Nat Gas Chem 19 (2010) 47-53 | Na2WO4/Mn/SiO2    | 1113     | 6.0                            | 1.0                      | 98.4                | 19.4                 | 38.7                 | 43.0                  | 18.3                | 61.3                | 11.9                |
| J Nat Gas Chem 19 (2010) 47-53 | Ce/Na2WO4/Mn/SiO2 | 1113     | 3.0                            | 1.0                      | 95.0                | 30.3                 | 44.9                 | 36.1                  | 19.0                | 55.1                | 16.7                |
| J Nat Gas Chem 19 (2010) 47-53 | Ce/Na2WO4/Mn/SiO2 | 1113     | 4.0                            | 1.0                      | 97.6                | 22.6                 | 32.1                 | 47.2                  | 20.7                | 67.9                | 15.3                |
| J Nat Gas Chem 19 (2010) 47-53 | Ce/Na2WO4/Mn/SiO2 | 1113     | 5.0                            | 1.0                      | 97.4                | 20.6                 | 36.0                 | 43.5                  | 20.5                | 64.0                | 13.2                |
| J Nat Gas Chem 19 (2010) 47-53 | Ce/Na2WO4/Mn/SiO2 | 1113     | 6.0                            | 1.0                      | 99.3                | 20.3                 | 37.7                 | 43.6                  | 18.7                | 62.3                | 12.6                |
| J Nat Gas Chem 19 (2010) 47-53 | Ce/Na2WO4/Mn/SiO2 | 1113     | 3.0                            | 1.0                      | 96.1                | 32.1                 | 41.6                 | 37.4                  | 21.0                | 58.4                | 18.7                |
| J Nat Gas Chem 19 (2010) 47-53 | Ce/Na2WO4/Mn/SiO2 | 1113     | 4.0                            | 1.0                      | 97.7                | 23.9                 | 30.0                 | 48.3                  | 21.7                | 70.0                | 16.7                |
| J Nat Gas Chem 19 (2010) 47-53 | Ce/Na2WO4/Mn/SiO2 | 1113     | 5.0                            | 1.0                      | 98.8                | 20.9                 | 35.0                 | 44.5                  | 20.5                | 65.0                | 13.6                |
| J Nat Gas Chem 19 (2010) 47-53 | Ce/Na2WO4/Mn/SiO2 | 1113     | 6.0                            | 1.0                      | 99.4                | 21.8                 | 35.9                 | 45.2                  | 18.9                | 64.1                | 14.0                |
| J Nat Gas Chem 19 (2010) 47-53 | Ce/Na2WO4/Mn/SiO2 | 1113     | 3.0                            | 1.0                      | 98.8                | 33.8                 | 39.4                 | 38.6                  | 22.0                | 60.6                | 20.5                |
| J Nat Gas Chem 19 (2010) 47-53 | Ce/Na2WO4/Mn/SiO2 | 1113     | 4.0                            | 1.0                      | 98.9                | 25.1                 | 27.2                 | 48.9                  | 23.9                | 72.8                | 18.3                |
| J Nat Gas Chem 19 (2010) 47-53 | Ce/Na2WO4/Mn/SiO2 | 1113     | 5.0                            | 1.0                      | 99.7                | 21.6                 | 33.2                 | 45.4                  | 21.4                | 66.8                | 14.4                |
| J Nat Gas Chem 19 (2010) 47-53 | Ce/Na2WO4/Mn/SiO2 | 1113     | 6.0                            | 1.0                      | 99.3                | 22.5                 | 34.4                 | 45.0                  | 20.6                | 65.6                | 14.8                |

**Table S1: Database with catalyst composition and their performance in OCM reaction under different conditions.**

| Reference                             | Catalyst            | Temp., K | $p(\text{CH}_4)/p(\text{O}_2)$ | $p_{\text{total}}$ , bar | $X(\text{O}_2)$ , % | $X(\text{CH}_4)$ , % | $S(\text{CO}_x)$ , % | $S(\text{C}_2^-)$ , % | $S(\text{C}_2^-)$ , % | $S(\text{C}_2)$ , % | $Y(\text{C}_2)$ , % |
|---------------------------------------|---------------------|----------|--------------------------------|--------------------------|---------------------|----------------------|----------------------|-----------------------|-----------------------|---------------------|---------------------|
| J Nat Gas Chem 19 (2010) 47-53        | Ce/Na2WO4/Mn/SiO2   | 1113     | 3.0                            | 1.0                      | 98.2                | 33.9                 | 37.6                 | 40.6                  | 21.8                  | 62.4                | 21.2                |
| J Nat Gas Chem 19 (2010) 47-53        | Ce/Na2WO4/Mn/SiO2   | 1113     | 4.0                            | 1.0                      | 99.0                | 26.2                 | 24.8                 | 49.9                  | 25.3                  | 75.2                | 19.7                |
| J Nat Gas Chem 19 (2010) 47-53        | Ce/Na2WO4/Mn/SiO2   | 1113     | 5.0                            | 1.0                      | 99.6                | 22.2                 | 29.8                 | 48.4                  | 21.8                  | 70.2                | 15.6                |
| J Nat Gas Chem 19 (2010) 47-53        | Ce/Na2WO4/Mn/SiO2   | 1113     | 6.0                            | 1.0                      | 99.1                | 22.0                 | 31.8                 | 46.3                  | 21.9                  | 68.2                | 15.0                |
| J Nat Gas Chem 19 (2010) 47-53        | Ce/Na2WO4/Mn/SiO2   | 1113     | 3.0                            | 1.0                      | 98.4                | 34.1                 | 41.0                 | 37.3                  | 21.7                  | 59.0                | 20.1                |
| J Nat Gas Chem 19 (2010) 47-53        | Ce/Na2WO4/Mn/SiO2   | 1113     | 4.0                            | 1.0                      | 99.5                | 26.0                 | 24.7                 | 49.4                  | 25.9                  | 75.3                | 19.6                |
| J Nat Gas Chem 19 (2010) 47-53        | Ce/Na2WO4/Mn/SiO2   | 1113     | 5.0                            | 1.0                      | 99.9                | 22.6                 | 31.7                 | 46.7                  | 21.6                  | 68.3                | 15.4                |
| J Nat Gas Chem 19 (2010) 47-53        | Ce/Na2WO4/Mn/SiO2   | 1113     | 6.0                            | 1.0                      | 99.5                | 22.1                 | 34.0                 | 45.1                  | 20.9                  | 66.0                | 14.6                |
| J Nat Gas Chem 19 (2010) 47-53        | Ce/Na2WO4/Mn/SiO2   | 1113     | 3.0                            | 1.0                      | 98.8                | 34.6                 | 42.8                 | 36.1                  | 21.1                  | 57.2                | 19.8                |
| J Nat Gas Chem 19 (2010) 47-53        | Ce/Na2WO4/Mn/SiO2   | 1113     | 4.0                            | 1.0                      | 99.8                | 25.3                 | 27.4                 | 47.2                  | 25.4                  | 72.6                | 18.4                |
| J Nat Gas Chem 19 (2010) 47-53        | Ce/Na2WO4/Mn/SiO2   | 1113     | 5.0                            | 1.0                      | 99.7                | 21.2                 | 35.0                 | 44.4                  | 20.6                  | 65.0                | 13.8                |
| J Nat Gas Chem 19 (2010) 47-53        | Ce/Na2WO4/Mn/SiO2   | 1113     | 6.0                            | 1.0                      | 98.9                | 21.7                 | 36.0                 | 44.2                  | 19.8                  | 64.0                | 13.9                |
| J Nat Gas Chem 19 (2010) 173-178      | La/MgO              | 1073     | 4.0                            | 1.0                      |                     | 21.1                 | 65.6                 |                       |                       | 34.4                | 7.3                 |
| J Nat Gas Chem 19 (2010) 173-178      | La/MgO              | 1073     | 4.0                            | 1.0                      |                     | 25.3                 | 48.9                 |                       |                       | 51.1                | 12.9                |
| J Nat Gas Chem 19 (2010) 173-178      | La2O3               | 1073     | 4.0                            | 1.0                      |                     | 24.0                 | 53.9                 |                       |                       | 46.1                | 11.1                |
| J Nat Gas Chem 19 (2010) 173-178      | MgO                 | 1073     | 4.0                            | 1.0                      |                     | 22.9                 | 61.5                 |                       |                       | 37.5                | 8.6                 |
| J Nat Gas Chem 19 (2010) 515-521      | Na-W-Mn-Zr-S-P/SiO2 | 1023     | 3.0                            | 1.0                      |                     | 31.3                 | 48.6                 |                       |                       | 51.4                | 16.1                |
| J Nat Gas Chem 19 (2010) 515-521      | Na-W-Mn-Zr-S-P-SiO2 | 1023     | 3.0                            | 1.0                      |                     | 13.4                 | 53.0                 |                       |                       | 47.0                | 6.3                 |
| J Nat Gas Chem 19 (2010) 515-521      | Na-W-Mn-Zr-S-P/SiO2 | 1023     | 3.0                            | 1.0                      |                     | 46.6                 | 48.9                 |                       |                       | 51.1                | 23.8                |
| J Nat Gas Chem 19 (2010) 534-538      | La2O3-BaCO3         | 1073     | 4.0                            | 1.0                      |                     | 23.8                 | 42.4                 | 34.6                  | 23.1                  | 57.7                | 13.7                |
| J Nat Gas Chem 19 (2010) 534-538      | Sm2O3-BaCO3         | 1073     | 4.0                            | 1.0                      |                     | 24.1                 | 42.4                 | 35.3                  | 22.4                  | 57.7                | 13.9                |
| J Nat Gas Chem 19 (2010) 534-538      | MgO-BaCO3           | 1073     | 4.0                            | 1.0                      |                     | 23.2                 | 47.0                 | 33.9                  | 19.0                  | 52.9                | 12.3                |
| J Nat Gas Chem 19 (2010) 534-538      | CaO-BaCO3           | 1073     | 4.0                            | 1.0                      |                     | 23.9                 | 48.0                 | 29.3                  | 22.5                  | 51.8                | 12.4                |
| Patent 24.11.2010: CN 101385982 B     | MgO-TiO2            | 1073     | 3.0                            | 1.0                      |                     | 29.3                 | 41.5                 | 36.5                  | 21.9                  | 58.5                | 17.1                |
| Patent 24.11.2010: CN 101385982 B     | MgO-TiO2            | 1073     | 3.0                            | 1.0                      |                     | 28.8                 | 41.3                 | 37.2                  | 21.5                  | 58.7                | 16.9                |
| Patent 24.11.2010: CN 101385982 B     | MgO-TiO2            | 1073     | 3.0                            | 1.0                      |                     | 30.2                 | 39.6                 | 38.3                  | 22.2                  | 60.4                | 18.2                |
| Patent 24.11.2010: CN 101385982 B     | MgO-TiO2            | 1073     | 3.0                            | 1.0                      |                     | 29.9                 | 40.8                 | 36.6                  | 22.6                  | 59.2                | 17.7                |
| Patent 24.11.2010: CN 101385982 B     | MgO-TiO2            | 1073     | 3.0                            | 1.0                      |                     | 29.7                 | 39.0                 | 37.9                  | 23.2                  | 61.0                | 18.1                |
| Patent 24.11.2010: CN 101385982 B     | MgO-TiO2            | 1073     | 3.0                            | 1.0                      |                     | 28.6                 | 41.7                 | 36.9                  | 21.4                  | 58.3                | 16.6                |
| Patent 03.11.2010: GB2469877 A        | BaTiO3              | 1048     | 2.0                            | 1.0                      |                     | 20.5                 | 60.0                 |                       |                       | 40.1                | 8.2                 |
| Patent 03.11.2010: GB2469877 A        | BaTiGeO3            | 1048     | 2.0                            | 1.0                      |                     | 33.4                 | 53.5                 |                       |                       | 46.5                | 15.5                |
| Patent 03.11.2010: GB2469877 A        | BaTiSnO3            | 1048     | 2.0                            | 1.0                      |                     | 25.9                 | 46.5                 |                       |                       | 53.6                | 13.8                |
| Patent 03.11.2010: GB2469877 A        | BaTiAlO3            | 1048     | 2.0                            | 1.0                      |                     | 37.0                 | 50.0                 |                       |                       | 50.0                | 18.5                |
| Patent 03.11.2010: GB2469877 A        | BaTiGaO3            | 1048     | 2.0                            | 1.0                      |                     | 47.0                 | 50.0                 |                       |                       | 50.0                | 23.5                |
| Patent 03.11.2010: GB2469877 A        | BaTiGdO3            | 1048     | 2.0                            | 1.0                      |                     | 26.4                 | 37.5                 |                       |                       | 62.5                | 16.5                |
| Patent 03.11.2010: GB2469877 A        | BaTiGaO3            | 1048     | 2.0                            | 1.0                      |                     | 43.9                 | 44.5                 |                       |                       | 55.5                | 24.4                |
| Patent 03.11.2010: GB2469877 A        | CaZrLiO3            | 1048     | 2.0                            | 1.0                      |                     | 44.2                 | 40.9                 |                       |                       | 59.1                | 26.1                |
| Patent: 30.12.2010: US2010/0331595 A1 | Ba/MgO              | 873      | 5.0                            | 1.0                      |                     | 0.3                  | 45.7                 | 0.0                   | 54.3                  | 54.3                | 0.2                 |
| Patent: 30.12.2010: US2010/0331595 A1 | Ba/MgO              | 923      | 5.0                            | 1.0                      |                     | 14.3                 | 31.8                 | 31.4                  | 31.6                  | 68.2                | 9.8                 |
| Patent: 30.12.2010: US2010/0331595 A1 | Sr-La/MgO           | 773      | 5.0                            | 1.0                      |                     | 19.4                 | 96.2                 | 0.0                   | 3.8                   | 3.8                 | 0.7                 |
| Patent: 30.12.2010: US2010/0331595 A1 | Sr-La/MgO           | 823      | 5.0                            | 1.0                      |                     | 23.1                 | 96.8                 | 0.0                   | 3.2                   | 3.2                 | 0.7                 |
| Patent: 30.12.2010: US2010/0331595 A1 | Sr-La/MgO           | 873      | 5.0                            | 1.0                      |                     | 34.9                 | 70.1                 | 14.8                  | 14.2                  | 29.9                | 10.4                |
| Patent: 30.12.2010: US2010/0331595 A1 | Sr-La/MgO           | 923      | 5.0                            | 1.0                      |                     | 36.1                 | 66.6                 | 16.6                  | 16.1                  | 33.4                | 12.1                |

**Table S1: Database with catalyst composition and their performance in OCM reaction under different conditions.**

| Reference                             | Catalyst     | Temp., K | p(CH <sub>4</sub> )/p(O <sub>2</sub> ) | p <sub>total</sub> , bar | X(O <sub>2</sub> ), % | X(CH <sub>4</sub> ), % | S(CO <sub>x</sub> ), % | S(C <sub>2</sub> <sup>-</sup> ), % | S(C <sub>2</sub> -), % | S(C <sub>2</sub> ), % | Y(C <sub>2</sub> ), % |
|---------------------------------------|--------------|----------|----------------------------------------|--------------------------|-----------------------|------------------------|------------------------|------------------------------------|------------------------|-----------------------|-----------------------|
| Patent: 30.12.2010: US2010/0331595 A1 | Sr-La/MgO    | 973      | 5.0                                    | 1.0                      |                       | 35.8                   | 66.2                   | 17.5                               | 15.6                   | 33.8                  | 12.1                  |
| Patent: 30.12.2010: US2010/0331595 A1 | Na-Cs-Re/MgO | 873      | 5.0                                    | 1.0                      |                       | 0.2                    | 100.0                  |                                    |                        | 0.0                   | 0.0                   |
| Patent: 30.12.2010: US2010/0331595 A1 | Na-Cs-Re/MgO | 923      | 5.0                                    | 1.0                      |                       | 0.4                    | 100.0                  |                                    |                        | 0.0                   | 0.0                   |
| Patent: 30.12.2010: US2010/0331595 A1 | Na-Cs-Re/MgO | 973      | 5.0                                    | 1.0                      |                       | 1.0                    | 100.0                  |                                    |                        | 0.0                   | 0.0                   |
| Patent: 30.12.2010: US2010/0331595 A1 | Na-Cs-Re/MgO | 1023     | 5.0                                    | 1.0                      |                       | 4.8                    | 95.2                   | 1.0                                | 3.8                    | 4.8                   | 0.2                   |
| Appl Catal A 391 (2011) 205-214       | Th2O3        | 1003     | 5.0                                    | 1.0                      | 80.0                  | 16.0                   |                        |                                    |                        | 31.0                  | 5.0                   |
| Appl Catal A 391 (2011) 205-214       | Na-Th2O3     | 1003     | 5.0                                    | 1.0                      | 98.0                  | 22.0                   |                        |                                    |                        | 47.0                  | 10.3                  |
| Appl Catal A 391 (2011) 205-214       | Ca-Th2O3     | 1003     | 5.0                                    | 1.0                      | 100.0                 | 24.0                   |                        |                                    |                        | 56.0                  | 13.4                  |
| Appl Catal A 391 (2011) 205-214       | Na-Ca-Th2O3  | 1003     | 5.0                                    | 1.0                      | 100.0                 | 23.0                   |                        |                                    |                        | 58.0                  | 13.3                  |
| Appl Catal A 391 (2011) 205-214       | K-Ca-Th2O3   | 1003     | 5.0                                    | 1.0                      | 100.0                 | 24.0                   |                        |                                    |                        | 56.0                  | 13.4                  |
| Appl Catal A 391 (2011) 205-214       | SrLaO3       | 1003     | 5.0                                    | 1.0                      | 100.0                 | 25.0                   |                        |                                    |                        | 63.0                  | 15.8                  |
| Appl Catal A 391 (2011) 205-214       | Li/MgO       | 1003     | 5.0                                    | 1.0                      | 9.0                   | 1.0                    |                        |                                    |                        | 40.0                  | 0.4                   |
| Appl Catal A 391 (2011) 205-214       | Na-W-Mn/SiO2 | 1003     | 5.0                                    | 1.0                      | 7.0                   | 1.0                    |                        |                                    |                        | 49.0                  | 0.5                   |
| Appl Catal A 406 (2011) 1-12          | Li-W-Mn/SiO2 | 1015     | 2.1                                    | 1.0                      | 3.0                   | 1.0                    | 20.0                   | 16.0                               | 64.0                   | 80.0                  | 0.8                   |
| Appl Catal A 406 (2011) 1-12          | Li-W-Mn/SiO2 | 1055     | 2.3                                    | 1.0                      | 20.0                  | 5.0                    | 17.0                   | 21.0                               | 61.0                   | 83.0                  | 4.2                   |
| Appl Catal A 406 (2011) 1-12          | Li-W-Mn/SiO2 | 1074     | 2.0                                    | 1.0                      | 17.0                  | 11.0                   | 18.0                   | 30.0                               | 50.0                   | 82.0                  | 9.0                   |
| Appl Catal A 406 (2011) 1-12          | Li-W-Mn/SiO2 | 1127     | 2.1                                    | 1.0                      | 92.0                  | 45.0                   | 47.0                   | 36.0                               | 12.0                   | 53.0                  | 23.9                  |
| Appl Catal A 406 (2011) 1-12          | Li-W-Mn/SiO2 | 1158     | 2.2                                    | 1.0                      | 94.0                  | 46.0                   | 49.0                   | 36.0                               | 10.0                   | 51.0                  | 23.5                  |
| Appl Catal A 406 (2011) 1-12          | Li-W-Mn/SiO2 | 1170     | 2.1                                    | 1.0                      | 97.0                  | 45.0                   | 54.0                   | 33.0                               | 9.0                    | 46.0                  | 20.7                  |
| Appl Catal A 406 (2011) 1-12          | Li-W-Mn/SiO2 | 1205     | 2.3                                    | 1.0                      | 98.0                  | 44.0                   | 55.0                   | 32.0                               | 8.0                    | 45.0                  | 19.8                  |
| Appl Catal A 406 (2011) 1-12          | Li-W-Mn/SiO2 | 1103     | 3.2                                    | 1.0                      | 23.0                  | 15.0                   | 15.0                   | 36.0                               | 39.0                   | 85.0                  | 12.8                  |
| Appl Catal A 406 (2011) 1-12          | Li-W-Mn/SiO2 | 1170     | 3.2                                    | 1.0                      | 94.0                  | 34.0                   | 39.0                   | 42.0                               | 14.0                   | 61.0                  | 20.7                  |
| Appl Catal A 406 (2011) 1-12          | Li-W-Mn/SiO2 | 1199     | 3.2                                    | 1.0                      | 96.0                  | 33.0                   | 40.0                   | 41.0                               | 13.0                   | 60.0                  | 19.8                  |
| Appl Catal A 406 (2011) 1-12          | Li-W-Mn/SiO2 | 1217     | 3.2                                    | 1.0                      | 98.0                  | 33.0                   | 43.0                   | 40.0                               | 12.0                   | 57.0                  | 18.8                  |
| Appl Catal A 406 (2011) 1-12          | Li-W-Mn/SiO2 | 1155     | 4.0                                    | 1.0                      | 89.0                  | 30.0                   | 31.0                   | 46.0                               | 17.0                   | 69.0                  | 20.7                  |
| Appl Catal A 406 (2011) 1-12          | Li-W-Mn/SiO2 | 1188     | 4.0                                    | 1.0                      | 95.0                  | 27.0                   | 35.0                   | 44.0                               | 14.0                   | 65.0                  | 17.6                  |
| Appl Catal A 406 (2011) 1-12          | Li-W-Mn/SiO2 | 1203     | 4.0                                    | 1.0                      | 96.0                  | 27.0                   | 37.0                   | 44.0                               | 13.0                   | 63.0                  | 17.0                  |
| Appl Catal A 406 (2011) 1-12          | Li-W-Mn/SiO2 | 1211     | 4.0                                    | 1.0                      | 96.0                  | 27.0                   | 38.0                   | 43.0                               | 12.0                   | 62.0                  | 16.7                  |
| Appl Catal A 406 (2011) 1-12          | Li-W-Mn/SiO2 | 1176     | 2.1                                    | 1.0                      | 84.0                  | 31.0                   | 37.0                   | 46.0                               | 8.0                    | 63.0                  | 19.5                  |
| Appl Catal A 406 (2011) 1-12          | Li-W-Mn/SiO2 | 1016     | 2.3                                    | 1.0                      | 0.0                   | 0.0                    | 0.0                    | 0.0                                | 0.0                    | 0.0                   | 0.0                   |
| Appl Catal A 406 (2011) 1-12          | Li-W-Mn/SiO2 | 1085     | 2.3                                    | 1.0                      | 16.0                  | 3.0                    | 2.0                    | 36.0                               | 57.0                   | 98.0                  | 2.9                   |
| Appl Catal A 406 (2011) 1-12          | Li-W-Mn/SiO2 | 1145     | 2.3                                    | 1.0                      | 6.0                   | 10.0                   | 14.0                   | 56.0                               | 22.0                   | 86.0                  | 8.6                   |
| Appl Catal A 406 (2011) 1-12          | Li-W-Mn/SiO2 | 1173     | 2.3                                    | 1.0                      | 40.0                  | 18.0                   | 35.0                   | 48.0                               | 10.0                   | 65.0                  | 11.7                  |
| Appl Catal A 406 (2011) 1-12          | Na-W-Mn/SiO2 | 1092     | 2.1                                    | 1.0                      | 89.0                  | 37.0                   | 52.0                   | 35.0                               | 11.0                   | 48.0                  | 17.8                  |
| Appl Catal A 406 (2011) 1-12          | Na-W-Mn/SiO2 | 1124     | 2.2                                    | 1.0                      | 96.0                  | 40.0                   | 55.0                   | 28.0                               | 7.0                    | 45.0                  | 18.0                  |
| Appl Catal A 406 (2011) 1-12          | Na-W-Mn/SiO2 | 1175     | 2.0                                    | 1.0                      | 97.0                  | 45.0                   | 47.0                   | 36.0                               | 14.0                   | 53.0                  | 23.9                  |
| Appl Catal A 406 (2011) 1-12          | Na-W-Mn/SiO2 | 1123     | 2.7                                    | 1.0                      | 95.0                  | 34.0                   | 50.0                   | 36.0                               | 11.0                   | 50.0                  | 17.0                  |
| Appl Catal A 406 (2011) 1-12          | Na-W-Mn/SiO2 | 1151     | 2.7                                    | 1.0                      | 96.0                  | 39.0                   | 50.0                   | 34.0                               | 6.0                    | 50.0                  | 19.5                  |
| Appl Catal A 406 (2011) 1-12          | Na-W-Mn/SiO2 | 1172     | 3.0                                    | 1.0                      | 96.0                  | 44.0                   | 48.0                   | 36.0                               | 13.0                   | 52.0                  | 22.9                  |
| Appl Catal A 406 (2011) 1-12          | Na-W-Mn/SiO2 | 1182     | 3.0                                    | 1.0                      | 97.0                  | 44.0                   | 46.0                   | 38.0                               | 11.0                   | 54.0                  | 23.8                  |
| Appl Catal A 406 (2011) 1-12          | Na-W-Mn/SiO2 | 1181     | 2.7                                    | 1.0                      | 98.0                  | 38.0                   | 53.0                   | 30.0                               | 6.0                    | 47.0                  | 17.9                  |
| Appl Catal A 406 (2011) 1-12          | K-W-Mn/SiO2  | 1090     | 2.0                                    | 1.0                      | 13.0                  | 16.0                   | 35.0                   | 32.0                               | 35.0                   | 65.0                  | 10.4                  |
| Appl Catal A 406 (2011) 1-12          | K-W-Mn/SiO2  | 1122     | 2.1                                    | 1.0                      | 70.0                  | 35.0                   | 41.0                   | 37.0                               | 17.0                   | 59.0                  | 20.7                  |

**Table S1: Database with catalyst composition and their performance in OCM reaction under different conditions.**

| Reference                             | Catalyst       | Temp., K | $p(\text{CH}_4)/p(\text{O}_2)$ | $p_{\text{total}}$ , bar | $X(\text{O}_2)$ , % | $X(\text{CH}_4)$ , % | $S(\text{CO}_x)$ , % | $S(\text{C}_2^-)$ , % | $S(\text{C}_2^-)$ , % | $S(\text{C}_2)$ , % | $Y(\text{C}_2)$ , % |
|---------------------------------------|----------------|----------|--------------------------------|--------------------------|---------------------|----------------------|----------------------|-----------------------|-----------------------|---------------------|---------------------|
| Appl Catal A 406 (2011) 1-12          | K-W-Mn/SiO2    | 1157     | 2.1                            | 1.0                      | 75.0                | 37.0                 | 46.0                 | 38.0                  | 11.0                  | 54.0                | 20.0                |
| Appl Catal A 406 (2011) 1-12          | K-W-Mn/SiO2    | 1142     | 2.2                            | 1.0                      | 47.0                | 21.0                 | 30.0                 | 40.0                  | 25.0                  | 70.0                | 14.7                |
| Appl Catal A 406 (2011) 1-12          | K-W-Mn/SiO2    | 1147     | 2.2                            | 1.0                      | 66.0                | 31.0                 | 33.0                 | 43.0                  | 22.0                  | 67.0                | 20.8                |
| Appl Catal A 406 (2011) 1-12          | K-W-Mn/SiO2    | 1154     | 2.2                            | 1.0                      | 64.0                | 28.0                 | 31.0                 | 42.0                  | 20.0                  | 69.0                | 19.3                |
| Appl Catal A 406 (2011) 1-12          | K-W-Mn/SiO2    | 1057     | 2.4                            | 1.0                      | 3.0                 | 6.0                  | 28.0                 | 21.0                  | 46.0                  | 72.0                | 4.3                 |
| Appl Catal A 406 (2011) 1-12          | K-W-Mn/SiO2    | 1077     | 2.5                            | 1.0                      | 16.0                | 16.0                 | 22.0                 | 34.0                  | 42.0                  | 78.0                | 12.5                |
| Appl Catal A 406 (2011) 1-12          | K-W-Mn/SiO2    | 1155     | 2.4                            | 1.0                      | 88.0                | 41.0                 | 34.0                 | 40.0                  | 22.0                  | 66.0                | 27.1                |
| Appl Catal A 406 (2011) 1-12          | K-W-Mn/SiO2    | 1168     | 2.4                            | 1.0                      | 90.0                | 39.0                 | 38.0                 | 42.0                  | 16.0                  | 62.0                | 24.2                |
| Appl Catal A 406 (2011) 1-12          | K-W-Mn/SiO2    | 1170     | 2.5                            | 1.0                      | 90.0                | 39.0                 | 40.0                 | 41.0                  | 16.0                  | 60.0                | 23.4                |
| Appl Catal A 406 (2011) 1-12          | K-W-Mn/SiO2    | 1089     | 4.6                            | 1.0                      | 33.0                | 8.0                  | 12.0                 | 37.0                  | 47.0                  | 88.0                | 7.0                 |
| Appl Catal A 406 (2011) 1-12          | K-W-Mn/SiO2    | 1119     | 4.6                            | 1.0                      | 61.0                | 20.0                 | 12.0                 | 46.0                  | 35.0                  | 88.0                | 17.6                |
| Appl Catal A 406 (2011) 1-12          | K-W-Mn/SiO2    | 1149     | 4.6                            | 1.0                      | 79.0                | 26.0                 | 16.0                 | 50.0                  | 28.0                  | 84.0                | 21.8                |
| Appl Catal A 406 (2011) 1-12          | K-W-Mn/SiO2    | 1153     | 2.4                            | 1.0                      | 48.0                | 26.0                 | 51.0                 | 37.0                  | 7.0                   | 49.0                | 12.7                |
| Appl Catal A 406 (2011) 1-12          | Rb-W-Mn/SiO2   | 1080     | 2.2                            | 1.0                      | 31.0                | 21.0                 | 49.0                 | 23.0                  | 28.0                  | 51.0                | 10.7                |
| Appl Catal A 406 (2011) 1-12          | Rb-W-Mn/SiO2   | 1128     | 2.2                            | 1.0                      | 59.0                | 35.0                 | 46.0                 | 34.0                  | 18.0                  | 54.0                | 18.9                |
| Appl Catal A 406 (2011) 1-12          | Rb-W-Mn/SiO2   | 1138     | 2.2                            | 1.0                      | 59.0                | 32.0                 | 40.0                 | 46.0                  | 14.0                  | 60.0                | 19.2                |
| Appl Catal A 406 (2011) 1-12          | Rb-W-Mn/SiO2   | 1145     | 2.2                            | 1.0                      | 63.0                | 33.0                 | 46.0                 | 34.0                  | 18.0                  | 54.0                | 17.8                |
| Appl Catal A 406 (2011) 1-12          | Rb-W-Mn/SiO2   | 1110     | 2.4                            | 1.0                      | 62.0                | 23.0                 | 38.0                 | 36.0                  | 20.0                  | 62.0                | 14.3                |
| Appl Catal A 406 (2011) 1-12          | Rb-W-Mn/SiO2   | 1117     | 2.5                            | 1.0                      | 81.0                | 42.0                 | 39.0                 | 38.0                  | 19.0                  | 61.0                | 25.6                |
| Appl Catal A 406 (2011) 1-12          | Rb-W-Mn/SiO2   | 1181     | 2.5                            | 1.0                      | 98.0                | 49.0                 | 57.0                 | 33.0                  | 10.0                  | 43.0                | 21.1                |
| Appl Catal A 406 (2011) 1-12          | Rb-W-Mn/SiO2   | 1113     | 2.4                            | 1.0                      | 62.0                | 23.0                 | 38.0                 | 36.0                  | 20.0                  | 62.0                | 14.3                |
| Appl Catal A 406 (2011) 1-12          | Rb-W-Mn/SiO2   | 1080     | 2.7                            | 1.0                      | 8.0                 | 8.0                  | 18.0                 | 36.0                  | 41.0                  | 82.0                | 6.6                 |
| Appl Catal A 406 (2011) 1-12          | Rb-W-Mn/SiO2   | 1138     | 2.7                            | 1.0                      | 84.0                | 35.0                 | 38.0                 | 42.0                  | 15.0                  | 62.0                | 21.7                |
| Appl Catal A 406 (2011) 1-12          | Rb-W-Mn/SiO2   | 1146     | 2.7                            | 1.0                      | 71.0                | 33.0                 | 37.0                 | 43.0                  | 16.0                  | 63.0                | 20.8                |
| Appl Catal A 406 (2011) 1-12          | Rb-W-Mn/SiO2   | 1168     | 2.7                            | 1.0                      | 52.0                | 26.0                 | 35.0                 | 40.0                  | 19.0                  | 65.0                | 16.9                |
| Appl Catal A 406 (2011) 1-12          | Cs-W-Mn/SiO2   | 1085     | 2.0                            | 1.0                      | 44.0                | 17.0                 | 57.0                 | 16.0                  | 25.0                  | 43.0                | 7.3                 |
| Appl Catal A 406 (2011) 1-12          | Cs-W-Mn/SiO2   | 1164     | 2.0                            | 1.0                      | 91.0                | 37.0                 | 47.0                 | 33.0                  | 17.0                  | 53.0                | 19.6                |
| Appl Catal A 406 (2011) 1-12          | Cs-W-Mn/SiO2   | 1166     | 2.0                            | 1.0                      | 97.0                | 40.0                 | 48.0                 | 33.0                  | 14.0                  | 52.0                | 20.8                |
| Appl Catal A 406 (2011) 1-12          | Cs-W-Mn/SiO2   | 1122     | 2.7                            | 1.0                      | 96.0                | 37.0                 | 54.0                 | 32.0                  | 8.0                   | 46.0                | 17.0                |
| Appl Catal A 406 (2011) 1-12          | Cs-W-Mn/SiO2   | 1145     | 2.7                            | 1.0                      | 98.0                | 38.0                 | 56.0                 | 31.0                  | 7.0                   | 44.0                | 16.7                |
| Appl Catal A 406 (2011) 1-12          | Cs-W-Mn/SiO2   | 1177     | 2.7                            | 1.0                      | 98.0                | 38.0                 | 57.0                 | 31.0                  | 4.0                   | 43.0                | 16.3                |
| Appl Catal A 406 (2011) 1-12          | W-Mn/SiO2      | 1122     | 2.1                            | 1.0                      | 18.0                | 13.0                 | 42.0                 | 27.0                  | 30.0                  | 58.0                | 7.5                 |
| Appl Catal A 406 (2011) 1-12          | W-Mn/SiO2      | 1157     | 2.1                            | 1.0                      | 32.0                | 22.0                 | 45.0                 | 33.0                  | 19.0                  | 55.0                | 12.1                |
| Appl Catal A 406 (2011) 1-12          | W-Mn/SiO2      | 1187     | 2.1                            | 1.0                      | 50.0                | 29.0                 | 51.0                 | 33.0                  | 13.0                  | 49.0                | 14.2                |
| Chem Eng Journal 168 (2011) 1352-1359 | Na-W-Mn/SiO2   | 1023     | 4.0                            | 1.0                      | 27.0                | 8.0                  | 24.0                 |                       |                       | 76.0                | 6.1                 |
| Chem Eng Journal 168 (2011) 1352-1359 | SiO2           | 1073     | 4.0                            | 1.0                      | 22.0                | 4.0                  | 82.0                 |                       |                       | 18.0                | 0.7                 |
| Fuel Proc Techn 92 (2011) 1164-1168   | Ba-Ti-Sn       | 1048     | 2.0                            | 1.0                      | 68.0                | 31.2                 | 55.7                 | 34.7                  | 6.4                   | 41.1                | 12.8                |
| Fuel Proc Techn 92 (2011) 1164-1168   | Ba-Ti-Sn       | 1048     | 2.0                            | 1.0                      | 67.1                | 28.5                 | 63.3                 | 32.0                  | 7.0                   | 39.0                | 11.1                |
| Fuel Proc Techn 92 (2011) 1164-1168   | Ba-Ti-Sn       | 1048     | 2.0                            | 1.0                      | 99.5                | 44.2                 | 50.7                 | 40.0                  | 3.2                   | 43.2                | 19.1                |
| Fuel Proc Techn 92 (2011) 1164-1168   | Ba-Ti-Ce       | 1048     | 2.0                            | 1.0                      | 83.9                | 37.1                 | 60.3                 | 33.1                  | 4.3                   | 37.4                | 13.9                |
| Fuel Proc Techn 92 (2011) 1164-1168   | Ba-Ti-Ce       | 1048     | 2.0                            | 1.0                      | 83.8                | 36.7                 | 64.1                 | 31.3                  | 4.6                   | 35.9                | 13.2                |
| Fuel Proc Techn 92 (2011) 1164-1168   | Ba-Ti-Ce       | 1048     | 2.0                            | 1.0                      | 98.2                | 47.5                 | 48.5                 | 39.9                  | 3.1                   | 43.0                | 20.4                |
| Fuel Proc Techn 92 (2011) 541-546     | Na2WO4/Mn/SiO2 | 1073     | 3.0                            | 1.0                      |                     | 27.8                 | 35.0                 | 42.1                  | 22.9                  | 65.0                | 18.1                |

**Table S1: Database with catalyst composition and their performance in OCM reaction under different conditions.**

| Reference                         | Catalyst                                             | Temp., K | p(CH <sub>4</sub> )/p(O <sub>2</sub> ) | p <sub>total</sub> , bar | X(O <sub>2</sub> ), % | X(CH <sub>4</sub> ), % | S(CO <sub>x</sub> ), % | S(C <sub>2</sub> <sup>-</sup> ), % | S(C <sub>2</sub> -), % | S(C <sub>2</sub> ), % | Y(C <sub>2</sub> ), % |
|-----------------------------------|------------------------------------------------------|----------|----------------------------------------|--------------------------|-----------------------|------------------------|------------------------|------------------------------------|------------------------|-----------------------|-----------------------|
| Fuel Proc Techn 92 (2011) 541-546 | Na <sub>2</sub> WO <sub>4</sub> /Mn/SiO <sub>2</sub> | 1073     | 3.0                                    | 1.0                      |                       | 33.8                   | 40.7                   | 40.7                               | 18.6                   | 59.3                  | 20.0                  |
| J Catal 281 (2011) 241-253        | Al <sub>2</sub> O <sub>3</sub>                       | 1083     | 4.9                                    | 1.0                      |                       | 14.0                   | 84.0                   | 9.0                                | 7.0                    | 16.0                  | 2.2                   |
| J Catal 281 (2011) 241-253        | Sr/Al <sub>2</sub> O <sub>3</sub>                    | 1083     | 4.9                                    | 1.0                      |                       | 20.0                   | 63.0                   | 23.3                               | 13.7                   | 37.0                  | 7.4                   |
| J Catal 281 (2011) 241-253        | Sr/Al <sub>2</sub> O <sub>3</sub>                    | 1083     | 4.9                                    | 1.0                      |                       | 21.0                   | 54.0                   | 30.1                               | 15.9                   | 46.0                  | 9.7                   |
| J Catal 281 (2011) 241-253        | Sr/Al <sub>2</sub> O <sub>3</sub>                    | 1083     | 4.9                                    | 1.0                      |                       | 23.0                   | 43.0                   | 38.0                               | 19.0                   | 57.0                  | 13.1                  |
| J Catal 281 (2011) 241-253        | Sr/Al <sub>2</sub> O <sub>3</sub>                    | 1083     | 4.9                                    | 1.0                      |                       | 26.0                   | 39.0                   | 40.0                               | 21.0                   | 61.0                  | 15.9                  |
| J Catal 281 (2011) 241-253        | Sr/Al <sub>2</sub> O <sub>3</sub>                    | 1083     | 4.9                                    | 1.0                      |                       | 26.0                   | 39.0                   | 39.2                               | 21.8                   | 61.0                  | 15.9                  |
| J Catal 281 (2011) 241-253        | Sr/Al <sub>2</sub> O <sub>3</sub>                    | 1083     | 4.9                                    | 1.0                      |                       | 27.0                   | 37.0                   | 39.7                               | 23.3                   | 63.0                  | 17.0                  |
| J Catal 281 (2011) 241-253        | Sr/Al <sub>2</sub> O <sub>3</sub>                    | 1083     | 4.9                                    | 1.0                      |                       | 28.0                   | 37.0                   | 39.7                               | 23.3                   | 63.0                  | 17.6                  |
| J Catal 281 (2011) 241-253        | Sr/Al <sub>2</sub> O <sub>3</sub>                    | 1083     | 4.9                                    | 1.0                      |                       | 6.0                    | 36.0                   | 24.0                               | 40.0                   | 64.0                  | 3.8                   |
| J Catal 281 (2011) 241-253        | SrCO <sub>3</sub>                                    | 1083     | 4.9                                    | 1.0                      |                       | 6.0                    | 39.0                   | 25.1                               | 35.9                   | 61.0                  | 3.7                   |
| J Catal 281 (2011) 241-253        | Sr/Al <sub>2</sub> O <sub>3</sub>                    | 1083     | 4.9                                    | 1.0                      |                       | 9.0                    | 46.0                   | 29.5                               | 24.5                   | 54.0                  | 4.9                   |
| J Catal 281 (2011) 241-253        | Sr/Al <sub>2</sub> O <sub>3</sub>                    | 1083     | 4.9                                    | 1.0                      |                       | 27.0                   | 41.0                   | 40.0                               | 19.0                   | 59.0                  | 15.9                  |
| J Catal 281 (2011) 241-253        | Sr/Al <sub>2</sub> O <sub>3</sub>                    | 1083     | 4.9                                    | 1.0                      |                       | 27.0                   | 46.0                   | 40.2                               | 13.8                   | 54.0                  | 14.6                  |
| J Catal 281 (2011) 241-253        | Sr/Al <sub>2</sub> O <sub>3</sub>                    | 1083     | 4.9                                    | 1.0                      |                       | 22.0                   | 49.0                   |                                    |                        | 51.0                  | 11.2                  |
| J Catal 281 (2011) 241-253        | Sr/Al <sub>2</sub> O <sub>3</sub>                    | 1083     | 4.9                                    | 1.0                      |                       | 10.0                   | 46.0                   | 25.6                               | 28.4                   | 54.0                  | 5.4                   |
| J Catal 281 (2011) 241-253        | Sr/Al <sub>2</sub> O <sub>3</sub>                    | 1083     | 4.9                                    | 1.0                      |                       | 18.0                   | 42.0                   | 34.8                               | 23.2                   | 58.0                  | 10.4                  |
| J Catal 281 (2011) 241-253        | Sr/Al <sub>2</sub> O <sub>3</sub>                    | 1083     | 4.9                                    | 1.0                      |                       | 29.0                   | 38.0                   | 39.0                               | 23.0                   | 62.0                  | 18.0                  |
| J Catal 281 (2011) 241-253        | Na <sub>2</sub> WO <sub>4</sub> /Mn/SiO <sub>2</sub> | 1083     | 4.9                                    | 1.0                      |                       | 18.0                   | 32.0                   | 44.6                               | 23.4                   | 68.0                  | 12.2                  |
| J Catal 281 (2011) 241-253        | Sr/La <sub>2</sub> O <sub>3</sub>                    | 1083     | 4.9                                    | 1.0                      |                       | 25.0                   | 37.0                   | 18.0                               | 45.0                   | 63.0                  | 15.8                  |
| J Mol Catal A 346 (2011) 46-54    | ZnO-Sm <sub>2</sub> O <sub>3</sub>                   | 1048     | 5.0                                    | 1.0                      |                       | 21.7                   | 58.1                   |                                    |                        | 41.9                  | 9.1                   |
| J Mol Catal A 346 (2011) 46-54    | MgO-Sm <sub>2</sub> O <sub>3</sub>                   | 1048     | 5.0                                    | 1.0                      |                       | 23.2                   | 50.8                   |                                    |                        | 49.2                  | 11.4                  |
| J Mol Catal A 346 (2011) 46-54    | CaO-Sm <sub>2</sub> O <sub>3</sub>                   | 1048     | 5.0                                    | 1.0                      |                       | 25.0                   | 42.8                   |                                    |                        | 57.2                  | 14.3                  |
| J Mol Catal A 346 (2011) 46-54    | SrO-Sm <sub>2</sub> O <sub>3</sub>                   | 1048     | 5.0                                    | 1.0                      |                       | 25.9                   | 40.2                   |                                    |                        | 59.8                  | 15.5                  |
| J Nat Gas Chem 20 (2011) 204-213  | Na <sub>2</sub> WO <sub>4</sub> /Mn/SiO <sub>2</sub> | 873      | 6.0                                    | 1.0                      | 2.4                   | 0.2                    | 100.0                  |                                    |                        | 0.0                   | 0.0                   |
| J Nat Gas Chem 20 (2011) 204-213  | Na <sub>2</sub> WO <sub>4</sub> /Mn/SiO <sub>2</sub> | 923      | 6.0                                    | 1.0                      | 6.3                   | 0.6                    | 100.0                  |                                    |                        | 0.0                   | 0.0                   |
| J Nat Gas Chem 20 (2011) 204-213  | Na <sub>2</sub> WO <sub>4</sub> /Mn/SiO <sub>2</sub> | 948      | 6.0                                    | 1.0                      | 21.0                  | 3.4                    | 44.3                   |                                    |                        | 55.7                  | 1.9                   |
| J Nat Gas Chem 20 (2011) 204-213  | Na <sub>2</sub> WO <sub>4</sub> /Mn/SiO <sub>2</sub> | 973      | 6.0                                    | 1.0                      | 97.7                  | 22.1                   | 24.6                   |                                    |                        | 75.4                  | 16.7                  |
| J Nat Gas Chem 20 (2011) 204-213  | Na <sub>2</sub> WO <sub>4</sub> /Mn/SiO <sub>2</sub> | 873      | 6.0                                    | 1.0                      | 2.8                   | 0.1                    | 100.0                  |                                    |                        | 0.0                   | 0.0                   |
| J Nat Gas Chem 20 (2011) 204-213  | Na <sub>2</sub> WO <sub>4</sub> /Mn/SiO <sub>2</sub> | 923      | 6.0                                    | 1.0                      | 10.6                  | 1.1                    | 89.1                   |                                    |                        | 10.9                  | 0.1                   |
| J Nat Gas Chem 20 (2011) 204-213  | Na <sub>2</sub> WO <sub>4</sub> /Mn/SiO <sub>2</sub> | 948      | 6.0                                    | 1.0                      | 24.6                  | 3.9                    | 47.8                   |                                    |                        | 52.2                  | 2.0                   |
| J Nat Gas Chem 20 (2011) 204-213  | Na <sub>2</sub> WO <sub>4</sub> /Mn/SiO <sub>2</sub> | 973      | 6.0                                    | 1.0                      | 93.4                  | 20.2                   | 28.4                   |                                    |                        | 71.7                  | 14.5                  |
| J Nat Gas Chem 20 (2011) 204-213  | Na <sub>2</sub> WO <sub>4</sub> /Mn/SiO <sub>2</sub> | 983      | 6.0                                    | 1.0                      | 96.9                  | 2.2                    | 27.0                   |                                    |                        | 73.0                  | 1.6                   |
| J Nat Gas Chem 20 (2011) 204-213  | Na <sub>2</sub> WO <sub>4</sub> /Mn/SiO <sub>2</sub> | 988      | 6.0                                    | 1.0                      | 97.8                  | 22.1                   | 25.5                   |                                    |                        | 74.5                  | 16.5                  |
| J Nat Gas Chem 20 (2011) 204-213  | Na <sub>2</sub> WO <sub>4</sub> /Mn/SiO <sub>2</sub> | 873      | 6.0                                    | 1.0                      | 3.2                   | 0.3                    | 100.0                  |                                    |                        | 0.0                   | 0.0                   |
| J Nat Gas Chem 20 (2011) 204-213  | Na <sub>2</sub> WO <sub>4</sub> /Mn/SiO <sub>2</sub> | 923      | 6.0                                    | 1.0                      | 10.8                  | 1.0                    | 100.0                  |                                    |                        | 0.0                   | 0.0                   |
| J Nat Gas Chem 20 (2011) 204-213  | Na <sub>2</sub> WO <sub>4</sub> /Mn/SiO <sub>2</sub> | 948      | 6.0                                    | 1.0                      | 21.2                  | 3.4                    | 47.5                   |                                    |                        | 52.5                  | 1.8                   |
| J Nat Gas Chem 20 (2011) 204-213  | Na <sub>2</sub> WO <sub>4</sub> /Mn/SiO <sub>2</sub> | 973      | 6.0                                    | 1.0                      | 40.0                  | 7.6                    | 36.3                   |                                    |                        | 63.7                  | 4.8                   |
| J Nat Gas Chem 20 (2011) 204-213  | Na <sub>2</sub> WO <sub>4</sub> /Mn/SiO <sub>2</sub> | 983      | 6.0                                    | 1.0                      | 95.5                  | 21.1                   | 27.2                   |                                    |                        | 72.8                  | 15.4                  |
| J Nat Gas Chem 20 (2011) 204-213  | Na <sub>2</sub> WO <sub>4</sub> /Mn/SiO <sub>2</sub> | 998      | 6.0                                    | 1.0                      | 98.0                  | 22.0                   | 22.0                   |                                    |                        | 74.0                  | 16.3                  |
| J Nat Gas Chem 20 (2011) 428-434  | Na <sub>2</sub> SO <sub>4</sub> -Mn/SiO <sub>2</sub> | 1023     | 5.0                                    | 1.0                      |                       | 7.0                    | 40.9                   | 25.4                               | 33.7                   | 59.1                  | 4.1                   |
| J Nat Gas Chem 20 (2011) 428-434  | Na <sub>2</sub> SO <sub>4</sub> -Mn/SiO <sub>2</sub> | 1048     | 5.0                                    | 1.0                      |                       | 8.0                    | 33.0                   | 35.4                               | 31.6                   | 67.0                  | 5.4                   |
| J Nat Gas Chem 20 (2011) 428-434  | Na <sub>2</sub> SO <sub>4</sub> -Mn/SiO <sub>2</sub> | 1073     | 5.0                                    | 1.0                      |                       | 11.0                   | 28.7                   | 40.9                               | 30.4                   | 71.3                  | 7.8                   |

**Table S1: Database with catalyst composition and their performance in OCM reaction under different conditions.**

| Reference                                | Catalyst           | Temp., K | $p(\text{CH}_4)/p(\text{O}_2)$ | $p_{\text{total}}$ , bar | $X(\text{O}_2)$ , % | $X(\text{CH}_4)$ , % | $S(\text{CO}_x)$ , % | $S(\text{C}_2^-)$ , % | $S(\text{C}_2^-)$ , % | $S(\text{C}_2)$ , % | $Y(\text{C}_2)$ , % |
|------------------------------------------|--------------------|----------|--------------------------------|--------------------------|---------------------|----------------------|----------------------|-----------------------|-----------------------|---------------------|---------------------|
| J Nat Gas Chem 20 (2011) 428-434         | Na2SO4-Mn/SiO2     | 1098     | 5.0                            | 1.0                      |                     | 14.0                 | 27.4                 | 48.1                  | 24.5                  | 72.6                | 10.2                |
| J Nat Gas Chem 20 (2011) 428-434         | Na2SO4-Mn/SiO2     | 1073     | 5.0                            | 1.0                      |                     | 12.0                 | 31.0                 | 41.4                  | 27.6                  | 69.0                | 8.3                 |
| J Nat Gas Chem 20 (2011) 428-434         | Na2SO4-Mn/SiO2     | 1073     | 5.0                            | 1.0                      |                     | 13.0                 | 38.3                 | 41.6                  | 20.1                  | 61.7                | 8.0                 |
| J Nat Gas Chem 20 (2011) 428-434         | Na2SO4-Mn/SiO2     | 1073     | 5.0                            | 1.0                      |                     | 13.0                 | 42.0                 | 41.6                  | 16.4                  | 58.0                | 7.5                 |
| J Nat Gas Chem 20 (2011) 428-434         | Na2SO4-Mn/SiO2     | 1073     | 2.5                            | 1.0                      |                     | 15.0                 | 27.1                 | 43.1                  | 29.8                  | 72.9                | 10.9                |
| J Nat Gas Chem 20 (2011) 428-434         | Na2SO4-Mn/SiO2     | 1073     | 3.3                            | 1.0                      |                     | 13.0                 | 27.8                 | 42.1                  | 30.1                  | 72.2                | 9.4                 |
| J Nat Gas Chem 20 (2011) 428-434         | Na2SO4-Mn/SiO2     | 1073     | 7.5                            | 1.0                      |                     | 10.0                 | 28.9                 | 40.1                  | 31.0                  | 71.1                | 7.1                 |
| J Nat Gas Chem 20 (2011) 428-434         | Na2SO4-Mn/SiO2     | 1073     | 10.0                           | 1.0                      |                     | 9.0                  | 28.1                 | 39.8                  | 32.1                  | 71.9                | 6.5                 |
| J Nat Gas Chem 20 (2011) 428-434         | Na2SO4-WO3/SiO2    | 1023     | 5.0                            | 1.0                      |                     | 4.0                  | 39.4                 | 21.9                  | 38.7                  | 60.6                | 2.4                 |
| J Nat Gas Chem 20 (2011) 428-434         | Na2SO4-WO3/SiO2    | 1048     | 5.0                            | 1.0                      |                     | 5.0                  | 34.0                 | 29.7                  | 36.3                  | 66.0                | 3.3                 |
| J Nat Gas Chem 20 (2011) 428-434         | Na2SO4-WO3/SiO2    | 1073     | 5.0                            | 1.0                      |                     | 7.0                  | 29.9                 | 38.3                  | 31.8                  | 70.1                | 4.9                 |
| J Nat Gas Chem 20 (2011) 428-434         | Na2SO4-WO3/SiO2    | 1098     | 5.0                            | 1.0                      |                     | 10.0                 | 29.4                 | 41.1                  | 29.5                  | 70.6                | 7.1                 |
| J Nat Gas Chem 20 (2011) 428-434         | Na2SO4-WO3/SiO2    | 1073     | 5.0                            | 1.0                      |                     | 8.0                  | 31.3                 | 38.9                  | 29.8                  | 68.7                | 5.5                 |
| J Nat Gas Chem 20 (2011) 428-434         | Na2SO4-WO3/SiO2    | 1073     | 5.0                            | 1.0                      |                     | 8.0                  | 32.5                 | 39.1                  | 28.4                  | 67.5                | 5.4                 |
| J Nat Gas Chem 20 (2011) 428-434         | Na2SO4-WO3/SiO2    | 1073     | 5.0                            | 1.0                      |                     | 8.0                  | 40.8                 | 39.1                  | 20.1                  | 59.2                | 4.7                 |
| J Nat Gas Chem 20 (2011) 428-434         | Na2SO4-WO3/SiO2    | 1073     | 2.5                            | 1.0                      |                     | 11.0                 | 23.1                 | 46.1                  | 30.8                  | 76.9                | 8.5                 |
| J Nat Gas Chem 20 (2011) 428-434         | Na2SO4-WO3/SiO2    | 1073     | 3.3                            | 1.0                      |                     | 10.0                 | 22.9                 | 45.9                  | 31.2                  | 77.1                | 7.7                 |
| J Nat Gas Chem 20 (2011) 428-434         | Na2SO4-WO3/SiO2    | 1073     | 7.5                            | 1.0                      |                     | 5.0                  | 30.0                 | 38.2                  | 31.8                  | 70.0                | 3.5                 |
| J Nat Gas Chem 20 (2011) 428-434         | Na2SO4-WO3/SiO2    | 1073     | 10.0                           | 1.0                      |                     | 4.0                  | 27.2                 | 37.9                  | 34.9                  | 72.8                | 2.9                 |
| J Nat Gas Chem 20 (2011) 428-434         | Na2SO4-WO3-Mn/SiO2 | 1023     | 5.0                            | 1.0                      |                     | 19.0                 | 48.6                 | 24.0                  | 27.4                  | 51.4                | 9.8                 |
| J Nat Gas Chem 20 (2011) 428-434         | Na2SO4-WO3-Mn/SiO2 | 1048     | 5.0                            | 1.0                      |                     | 30.0                 | 44.9                 | 33.7                  | 21.4                  | 55.1                | 16.5                |
| J Nat Gas Chem 20 (2011) 428-434         | Na2SO4-WO3-Mn/SiO2 | 1073     | 5.0                            | 1.0                      |                     | 30.0                 | 40.2                 | 38.7                  | 21.1                  | 59.8                | 17.9                |
| J Nat Gas Chem 20 (2011) 428-434         | Na2SO4-WO3-Mn/SiO2 | 1098     | 5.0                            | 1.0                      |                     | 33.0                 | 39.5                 | 44.0                  | 16.5                  | 60.5                | 20.0                |
| J Nat Gas Chem 20 (2011) 428-434         | Na2SO4-WO3-Mn/SiO2 | 1073     | 5.0                            | 1.0                      |                     | 31.0                 | 41.6                 | 39.0                  | 19.4                  | 58.4                | 18.1                |
| J Nat Gas Chem 20 (2011) 428-434         | Na2SO4-WO3-Mn/SiO2 | 1073     | 5.0                            | 1.0                      |                     | 32.0                 | 44.2                 | 39.4                  | 16.4                  | 55.8                | 17.9                |
| J Nat Gas Chem 20 (2011) 428-434         | Na2SO4-WO3-Mn/SiO2 | 1073     | 5.0                            | 1.0                      |                     | 32.0                 | 44.1                 | 39.6                  | 16.3                  | 55.9                | 17.9                |
| J Nat Gas Chem 20 (2011) 428-434         | Na2SO4-WO3-Mn/SiO2 | 1073     | 2.5                            | 1.0                      |                     | 37.0                 | 45.1                 | 42.2                  | 12.7                  | 54.9                | 20.3                |
| J Nat Gas Chem 20 (2011) 428-434         | Na2SO4-WO3-Mn/SiO2 | 1073     | 3.3                            | 1.0                      |                     | 33.0                 | 42.7                 | 41.1                  | 16.2                  | 57.3                | 18.9                |
| J Nat Gas Chem 20 (2011) 428-434         | Na2SO4-WO3-Mn/SiO2 | 1073     | 7.5                            | 1.0                      |                     | 24.0                 | 39.1                 | 37.9                  | 23.0                  | 60.9                | 14.6                |
| J Nat Gas Chem 20 (2011) 428-434         | Na2SO4-WO3-Mn/SiO2 | 1073     | 10.0                           | 1.0                      |                     | 20.0                 | 37.4                 | 37.3                  | 25.3                  | 62.6                | 12.5                |
| J Taiwan Inst Chem Eng 42 (2011) 751-759 | Na2WO4/Mn/SiO2     | 987      | 3.5                            | 1.0                      |                     | 34.0                 | 32.9                 |                       |                       | 67.1                | 22.8                |
| J Taiwan Inst Chem Eng 42 (2011) 751-759 | Na2WO4/Mn/SiO2     | 948      | 3.3                            | 1.0                      |                     | 35.8                 | 34.1                 |                       |                       | 65.9                | 23.6                |
| Angew Chem Int Ed 52(2013) 11381         | Fe-MgO             | 1023     | 3.0                            | 1.0                      | 20.0                | 5.7                  |                      |                       |                       | 8.4                 | 0.5                 |
| Angew Chem Int Ed 52(2013) 11381         | Au-MgO             | 1023     | 3.0                            | 1.0                      | 4.0                 | 0.8                  |                      |                       |                       | 6.9                 | 0.1                 |
| Angew Chem Int Ed 52(2013) 11381         | Fe-Au-MgO          | 1023     | 3.0                            | 1.0                      | 35.0                | 9.2                  |                      |                       |                       | 8.8                 | 0.8                 |
| Appl Catal A 454(2013) 100-114           | Sm2O3 (Cl)- OM     | 1013     | 9.0                            | 1.0                      |                     | 7.5                  | 56.0                 | 17.4                  | 26.6                  | 44.0                | 3.3                 |
| Appl Catal A 454(2013) 100-114           | Sm2O3 (Cl)- OM     | 1013     | 7.0                            | 1.0                      |                     | 10.5                 | 56.1                 | 19.3                  | 24.7                  | 43.9                | 4.6                 |
| Appl Catal A 454(2013) 100-114           | Sm2O3 (Cl)- OM     | 1013     | 4.0                            | 1.0                      |                     | 17.5                 | 56.8                 | 22.7                  | 20.6                  | 43.5                | 7.6                 |
| Appl Catal A 454(2013) 100-114           | Sm2O3 (Cl)- OM     | 1073     | 9.0                            | 1.0                      |                     | 8.5                  | 48.9                 | 29.7                  | 21.4                  | 51.1                | 4.3                 |
| Appl Catal A 454(2013) 100-114           | Sm2O3 (Cl)- OM     | 1073     | 7.0                            | 1.0                      |                     | 12.5                 | 52.9                 | 29.8                  | 17.3                  | 47.1                | 5.9                 |
| Appl Catal A 454(2013) 100-114           | Sm2O3 (Cl)- OM     | 1073     | 4.0                            | 1.0                      |                     | 17.5                 | 58.8                 | 28.3                  | 12.9                  | 41.2                | 7.2                 |
| Appl Catal A 454(2013) 100-114           | Sm2O3 (N)- OM      | 1013     | 9.0                            | 1.0                      |                     | 10.0                 | 41.3                 | 25.5                  | 33.2                  | 58.5                | 5.9                 |
| Appl Catal A 454(2013) 100-114           | Sm2O3 (N)- OM      | 1013     | 7.0                            | 1.0                      |                     | 12.2                 | 44.6                 | 25.4                  | 30.0                  | 55.5                | 6.8                 |

**Table S1: Database with catalyst composition and their performance in OCM reaction under different conditions.**

| Reference                        | Catalyst            | Temp., K | $p(\text{CH}_4)/p(\text{O}_2)$ | $p_{\text{total}}$ , bar | $X(\text{O}_2)$ , % | $X(\text{CH}_4)$ , % | $S(\text{CO}_x)$ , % | $S(\text{C}_2^-)$ , % | $S(\text{C}_2^-)$ , % | $S(\text{C}_2)$ , % | $Y(\text{C}_2)$ , % |
|----------------------------------|---------------------|----------|--------------------------------|--------------------------|---------------------|----------------------|----------------------|-----------------------|-----------------------|---------------------|---------------------|
| Appl Catal A 454(2013) 100-114   | Sm2O3 (N)- OM       | 1013     | 4.0                            | 1.0                      |                     | 19.5                 | 56.4                 | 22.9                  | 20.7                  | 43.5                | 8.5                 |
| Appl Catal A 454(2013) 100-114   | Sm2O3 (N)- OM       | 1073     | 9.0                            | 1.0                      |                     | 10.0                 | 43.0                 | 36.0                  | 21.0                  | 57.0                | 5.7                 |
| Appl Catal A 454(2013) 100-114   | Sm2O3 (N)- OM       | 1073     | 7.0                            | 1.0                      |                     | 12.0                 | 46.4                 | 34.7                  | 18.9                  | 53.5                | 6.4                 |
| Appl Catal A 454(2013) 100-114   | Sm2O3 (N)- OM       | 1073     | 4.0                            | 1.0                      |                     | 19.0                 | 60.1                 | 27.6                  | 12.3                  | 40.0                | 7.6                 |
| Appl Catal A 454(2013) 100-114   | Sm2O3 (N)- ME       | 1013     | 9.0                            | 1.0                      |                     | 10.5                 | 41.8                 | 23.0                  | 27.6                  | 50.5                | 5.3                 |
| Appl Catal A 454(2013) 100-114   | Sm2O3 (N)- ME       | 1013     | 7.0                            | 1.0                      |                     | 13.0                 | 39.4                 | 23.9                  | 28.7                  | 52.5                | 6.8                 |
| Appl Catal A 454(2013) 100-114   | Sm2O3 (N)- ME       | 1013     | 4.0                            | 1.0                      |                     | 17.5                 | 60.3                 | 15.3                  | 14.5                  | 30.0                | 5.3                 |
| Appl Catal A 454(2013) 100-114   | Sm2O3 (N)- ME       | 1073     | 9.0                            | 1.0                      |                     | 8.5                  | 49.5                 | 21.5                  | 16.0                  | 37.5                | 3.2                 |
| Appl Catal A 454(2013) 100-114   | Sm2O3 (N)- ME       | 1073     | 7.0                            | 1.0                      |                     | 13.0                 | 42.4                 | 29.4                  | 18.3                  | 47.5                | 6.2                 |
| Appl Catal A 454(2013) 100-114   | Sm2O3 (N)- ME       | 1073     | 4.0                            | 1.0                      |                     | 18.0                 | 59.5                 | 19.2                  | 8.7                   | 28.0                | 5.0                 |
| Appl Catal A 454(2013) 100-114   | Sm2O3/p-Al2O3-OM    | 1013     | 9.0                            | 1.0                      |                     | 5.0                  | 93.8                 | 0.8                   | 5.4                   | 6.0                 | 0.3                 |
| Appl Catal A 454(2013) 100-114   | Sm2O3/p-Al2O3-OM    | 1013     | 7.0                            | 1.0                      |                     | 7.0                  | 92.7                 | 1.5                   | 5.8                   | 7.5                 | 0.5                 |
| Appl Catal A 454(2013) 100-114   | Sm2O3/p-Al2O3-OM    | 1013     | 4.0                            | 1.0                      |                     | 12.5                 | 89.4                 | 4.5                   | 6.1                   | 10.5                | 1.3                 |
| Appl Catal A 454(2013) 100-114   | Sm2O3/p-Al2O3-OM    | 1073     | 9.0                            | 1.0                      |                     | 6.0                  | 81.9                 | 8.7                   | 9.4                   | 18.0                | 1.1                 |
| Appl Catal A 454(2013) 100-114   | Sm2O3/p-Al2O3-OM    | 1073     | 7.0                            | 1.0                      |                     | 7.5                  | 80.2                 | 11.0                  | 8.7                   | 20.0                | 1.5                 |
| Appl Catal A 454(2013) 100-114   | Sm2O3/p-Al2O3-OM    | 1073     | 4.0                            | 1.0                      |                     | 14.5                 | 75.4                 | 18.3                  | 6.3                   | 24.5                | 3.6                 |
| Appl Catal A 454(2013) 100-114   | Sm2O3/p-Al2O3-ME    | 1013     | 9.0                            | 1.0                      |                     | 6.0                  | 78.3                 | 5.8                   | 15.9                  | 22.0                | 1.3                 |
| Appl Catal A 454(2013) 100-114   | Sm2O3/p-Al2O3-ME    | 1013     | 7.0                            | 1.0                      |                     | 8.5                  | 79.7                 | 5.8                   | 14.5                  | 20.5                | 1.7                 |
| Appl Catal A 454(2013) 100-114   | Sm2O3/p-Al2O3-ME    | 1013     | 4.0                            | 1.0                      |                     | 14.0                 | 79.0                 | 9.2                   | 11.8                  | 21.0                | 2.9                 |
| Appl Catal A 454(2013) 100-114   | Sm2O3/p-Al2O3-ME    | 1073     | 9.0                            | 1.0                      |                     | 7.5                  | 65.9                 | 19.8                  | 14.3                  | 34.0                | 2.6                 |
| Appl Catal A 454(2013) 100-114   | Sm2O3/p-Al2O3-ME    | 1073     | 7.0                            | 1.0                      |                     | 9.0                  | 70.0                 | 16.4                  | 13.5                  | 30.0                | 2.7                 |
| Appl Catal A 454(2013) 100-114   | Sm2O3/p-Al2O3-ME    | 1073     | 4.0                            | 1.0                      |                     | 15.0                 | 72.0                 | 19.3                  | 8.8                   | 28.0                | 4.2                 |
| Appl Catal A 454(2013) 100-114   | Sm2O3/p-Al2O3-IM    | 1013     | 9.0                            | 1.0                      |                     | 7.0                  | 80.5                 | 7.1                   | 12.4                  | 19.5                | 1.4                 |
| Appl Catal A 454(2013) 100-114   | Sm2O3/p-Al2O3-IM    | 1013     | 7.0                            | 1.0                      |                     | 8.5                  | 81.0                 | 6.5                   | 12.5                  | 19.0                | 1.6                 |
| Appl Catal A 454(2013) 100-114   | Sm2O3/p-Al2O3-IM    | 1013     | 4.0                            | 1.0                      |                     | 15.5                 | 75.5                 | 13.7                  | 10.8                  | 24.5                | 3.8                 |
| Appl Catal A 454(2013) 100-114   | Sm2O3/p-Al2O3-IM    | 1073     | 9.0                            | 1.0                      |                     | 7.5                  | 71.7                 | 15.9                  | 12.4                  | 28.5                | 2.1                 |
| Appl Catal A 454(2013) 100-114   | Sm2O3/p-Al2O3-IM    | 1073     | 7.0                            | 1.0                      |                     | 9.5                  | 71.3                 | 17.8                  | 10.9                  | 28.5                | 2.7                 |
| Appl Catal A 454(2013) 100-114   | Sm2O3/p-Al2O3-IM    | 1073     | 4.0                            | 1.0                      |                     | 16.5                 | 72.4                 | 20.1                  | 7.6                   | 27.5                | 4.5                 |
| Appl Catal A 454(2013) 100-114   | p-Al2O3             | 1013     | 4.0                            | 1.0                      |                     | 10.5                 | 91.4                 | 2.4                   | 6.1                   | 8.5                 | 0.9                 |
| Appl Catal A 454(2013) 100-114   | n-Al2O3(-)          | 1013     | 4.0                            | 1.0                      |                     | 11.5                 | 89.8                 | 1.7                   | 8.5                   | 10.0                | 1.2                 |
| Appl Catal A 454(2013) 100-114   | Sm2O3/n-Al2O3(+)-OM | 1013     | 4.0                            | 1.0                      |                     | 12.0                 | 85.2                 | 7.8                   | 7.0                   | 15.0                | 1.8                 |
| Appl Catal A 454(2013) 100-114   | Sm2O3/n-Al2O3(+)-OM | 1073     | 4.0                            | 1.0                      |                     | 13.5                 | 78.9                 | 14.8                  | 6.4                   | 21.0                | 2.8                 |
| Appl Catal A 454(2013) 100-114   | Sm2O3/n-Al2O3(+)-IM | 1013     | 4.0                            | 1.0                      |                     | 14.0                 | 76.4                 | 13.2                  | 10.4                  | 17.5                | 2.5                 |
| Appl Catal A 454(2013) 100-114   | Sm2O3/n-Al2O3(+)-IM | 1073     | 4.0                            | 1.0                      |                     | 15.5                 | 76.7                 | 15.2                  | 8.2                   | 24.5                | 3.8                 |
| Appl Catal A 454(2013) 100-114   | Sm2O3/n-Al2O3(-)-OM | 1013     | 4.0                            | 1.0                      |                     | 14.5                 | 82.7                 | 8.4                   | 9.0                   | 23.5                | 3.4                 |
| Appl Catal A 454(2013) 100-114   | Sm2O3/n-Al2O3(-)-OM | 1073     | 4.0                            | 1.0                      |                     | 14.5                 | 75.5                 | 17.2                  | 7.3                   | 23.5                | 3.4                 |
| Appl Catal A 454(2013) 100-114   | Sm2O3/n-Al2O3(-)-IM | 1013     | 4.0                            | 1.0                      |                     | 16.0                 | 67.9                 | 17.4                  | 14.7                  | 32.0                | 5.1                 |
| Appl Catal A 454(2013) 100-114   | Sm2O3/n-Al2O3(-)-IM | 1073     | 4.0                            | 1.0                      |                     | 16.0                 | 65.0                 | 24.1                  | 10.9                  | 35.0                | 5.6                 |
| Appl Catal A 454(2013) 100-114   | Sm2O3/p-Al2O3-ME    | 1013     | 4.0                            | 1.0                      |                     | 16.0                 | 69.0                 | 17.0                  | 14.0                  | 31.0                | 5.0                 |
| Appl Catal A 454(2013) 100-114   | Sm2O3/p-Al2O3-ME    | 1073     | 4.0                            | 1.0                      |                     | 16.0                 | 69.5                 | 21.5                  | 9.0                   | 30.5                | 4.9                 |
| Appl Catal A 454(2013) 100-114   | Sm2O3/p-Al2O3-IM    | 1013     | 4.0                            | 1.0                      |                     | 15.0                 | 75.8                 | 12.0                  | 12.2                  | 24.0                | 3.6                 |
| Appl Catal A 454(2013) 100-114   | Sm2O3/p-Al2O3-IM    | 1073     | 4.0                            | 1.0                      |                     | 15.5                 | 72.5                 | 19.8                  | 7.7                   | 27.5                | 4.3                 |
| Appl Catal A 464-465(2013) 68-77 | Na2WO4/Mn/TiO2      | 998      | 2.0                            | 1.0                      |                     | 1.4                  | 71.4                 | 2.6                   | 26.0                  | 28.6                | 0.4                 |



**Table S1: Database with catalyst composition and their performance in OCM reaction under different conditions.**

| Reference                        | Catalyst           | Temp., K | $p(\text{CH}_4)/p(\text{O}_2)$ | $p_{\text{total}}$ , bar | $X(\text{O}_2)$ , % | $X(\text{CH}_4)$ , % | $S(\text{CO}_x)$ , % | $S(\text{C}_2^-)$ , % | $S(\text{C}_2)$ , % | $S(\text{C}_2)$ , % | $Y(\text{C}_2)$ , % |
|----------------------------------|--------------------|----------|--------------------------------|--------------------------|---------------------|----------------------|----------------------|-----------------------|---------------------|---------------------|---------------------|
| Appl Catal A 464-465(2013) 68-77 | Na2WO4/Mn/TiO2-MgO | 998      | 2.0                            | 1.0                      |                     | 2.8                  | 76.5                 | 3.9                   | 19.6                | 23.5                | 0.6                 |
| Appl Catal A 464-465(2013) 68-77 | Na2WO4/Mn/TiO2-MgO | 998      | 2.0                            | 1.0                      |                     | 11.2                 | 72.5                 | 7.9                   | 19.6                | 27.5                | 3.1                 |
| Appl Catal A 464-465(2013) 68-77 | Na2WO4/Mn/TiO2-MgO | 998      | 2.0                            | 1.0                      |                     | 1.4                  | 68.9                 | 2.8                   | 28.3                | 31.1                | 0.4                 |
| Appl Catal A 464-465(2013) 68-77 | Na2WO4/Mn/MgO      | 998      | 2.0                            | 1.0                      |                     | 3.8                  | 88.8                 | 1.9                   | 9.3                 | 11.2                | 0.4                 |
| Appl Catal A 464-465(2013) 68-77 | TiO2-MgO           | 998      | 2.0                            | 1.0                      |                     | 7.2                  | 97.4                 | 0.4                   | 2.2                 | 2.6                 | 0.2                 |
| Appl Catal A 464-465(2013) 68-77 | Na2WO4/Mn/TiO2     | 1023     | 2.0                            | 1.0                      |                     | 2.1                  | 52.6                 | 4.3                   | 43.1                | 47.4                | 1.0                 |
| Appl Catal A 464-465(2013) 68-77 | Na2WO4/Mn/TiO2-MgO | 1023     | 2.0                            | 1.0                      |                     | 9.9                  | 76.1                 | 6.8                   | 17.1                | 23.9                | 2.3                 |
| Appl Catal A 464-465(2013) 68-77 | Na2WO4/Mn/TiO2-MgO | 1023     | 2.0                            | 1.0                      |                     | 25.7                 | 58.1                 | 21.0                  | 21.0                | 41.9                | 10.8                |
| Appl Catal A 464-465(2013) 68-77 | Na2WO4/Mn/TiO2-MgO | 1023     | 2.0                            | 1.0                      |                     | 4.3                  | 62.8                 | 6.2                   | 31.0                | 37.2                | 1.6                 |
| Appl Catal A 464-465(2013) 68-77 | Na2WO4/Mn/MgO      | 1023     | 2.0                            | 1.0                      |                     | 4.9                  | 65.1                 | 8.1                   | 26.8                | 34.9                | 1.7                 |
| Appl Catal A 464-465(2013) 68-77 | TiO2-MgO           | 1023     | 2.0                            | 1.0                      |                     | 12.7                 | 96.3                 | 0.9                   | 2.8                 | 3.7                 | 0.5                 |
| Appl Catal A 464-465(2013) 68-77 | Na2WO4/Mn/TiO2     | 1048     | 2.0                            | 1.0                      |                     | 5.0                  | 50.5                 | 11.4                  | 38.1                | 49.5                | 2.4                 |
| Appl Catal A 464-465(2013) 68-77 | Na2WO4/Mn/TiO2-MgO | 1048     | 2.0                            | 1.0                      |                     | 22.6                 | 62.5                 | 17.8                  | 19.7                | 37.5                | 8.5                 |
| Appl Catal A 464-465(2013) 68-77 | Na2WO4/Mn/TiO2-MgO | 1048     | 2.0                            | 1.0                      |                     | 37.1                 | 55.4                 | 27.4                  | 17.2                | 44.6                | 16.5                |
| Appl Catal A 464-465(2013) 68-77 | Na2WO4/Mn/TiO2-MgO | 1048     | 2.0                            | 1.0                      |                     | 9.2                  | 49.4                 | 16.9                  | 33.7                | 50.6                | 4.6                 |
| Appl Catal A 464-465(2013) 68-77 | Na2WO4/Mn/MgO      | 1048     | 2.0                            | 1.0                      |                     | 10.6                 | 59.8                 | 15.1                  | 25.1                | 40.2                | 4.3                 |
| Appl Catal A 464-465(2013) 68-77 | TiO2-MgO           | 1048     | 2.0                            | 1.0                      |                     | 18.1                 | 94.3                 | 1.9                   | 3.8                 | 5.7                 | 1.0                 |
| Appl Catal A 464-465(2013) 68-77 | Na2WO4/Mn/TiO2     | 1073     | 2.0                            | 1.0                      |                     | 11.8                 | 48.9                 | 19.2                  | 31.9                | 51.1                | 6.0                 |
| Appl Catal A 464-465(2013) 68-77 | Na2WO4/Mn/TiO2-MgO | 1073     | 2.0                            | 1.0                      |                     | 34.0                 | 59.8                 | 24.7                  | 15.5                | 40.2                | 13.7                |
| Appl Catal A 464-465(2013) 68-77 | Na2WO4/Mn/TiO2-MgO | 1073     | 2.0                            | 1.0                      |                     | 41.4                 | 56.9                 | 28.7                  | 14.4                | 43.1                | 17.9                |
| Appl Catal A 464-465(2013) 68-77 | Na2WO4/Mn/TiO2-MgO | 1073     | 2.0                            | 1.0                      |                     | 15.8                 | 38.2                 | 29.3                  | 32.5                | 61.8                | 9.8                 |
| Appl Catal A 464-465(2013) 68-77 | Na2WO4/Mn/MgO      | 1073     | 2.0                            | 1.0                      |                     | 11.9                 | 46.9                 | 23.6                  | 29.5                | 53.1                | 6.3                 |
| Appl Catal A 464-465(2013) 68-77 | TiO2-MgO           | 1073     | 2.0                            | 1.0                      |                     | 21.7                 | 91.9                 | 3.6                   | 4.5                 | 8.1                 | 1.8                 |
| Appl Catal A 464-465(2013) 68-77 | Na2WO4/Mn/TiO2     | 1098     | 2.0                            | 1.0                      |                     | 23.9                 | 48.6                 | 30.0                  | 21.4                | 51.4                | 12.3                |
| Appl Catal A 464-465(2013) 68-77 | Na2WO4/Mn/TiO2-MgO | 1098     | 2.0                            | 1.0                      |                     | 37.5                 | 59.4                 | 27.1                  | 13.5                | 40.6                | 15.2                |
| Appl Catal A 464-465(2013) 68-77 | Na2WO4/Mn/TiO2-MgO | 1098     | 2.0                            | 1.0                      |                     | 42.4                 | 57.3                 | 29.4                  | 13.3                | 42.7                | 18.1                |
| Appl Catal A 464-465(2013) 68-77 | Na2WO4/Mn/TiO2-MgO | 1098     | 2.0                            | 1.0                      |                     | 40.9                 | 56.0                 | 31.4                  | 12.6                | 44.0                | 18.0                |
| Appl Catal A 464-465(2013) 68-77 | Na2WO4/Mn/MgO      | 1098     | 2.0                            | 1.0                      |                     | 16.3                 | 43.1                 | 31.0                  | 25.9                | 56.9                | 9.3                 |
| Appl Catal A 464-465(2013) 68-77 | TiO2-MgO           | 1098     | 2.0                            | 1.0                      |                     | 23.5                 | 89.0                 | 5.8                   | 5.2                 | 11.0                | 2.6                 |
| Appl Catal A 464-465(2013) 68-77 | Na2WO4/Mn/TiO2     | 1123     | 2.0                            | 1.0                      |                     | 37.3                 | 54.4                 | 32.9                  | 12.7                | 45.6                | 17.0                |
| Appl Catal A 464-465(2013) 68-77 | Na2WO4/Mn/TiO2-MgO | 1123     | 2.0                            | 1.0                      |                     | 39.1                 | 58.7                 | 29.5                  | 11.8                | 41.3                | 16.1                |
| Appl Catal A 464-465(2013) 68-77 | Na2WO4/Mn/TiO2-MgO | 1123     | 2.0                            | 1.0                      |                     | 42.4                 | 58.3                 | 29.8                  | 11.9                | 41.7                | 17.7                |
| Appl Catal A 464-465(2013) 68-77 | Na2WO4/Mn/TiO2-MgO | 1123     | 2.0                            | 1.0                      |                     | 42.0                 | 59.0                 | 30.5                  | 10.5                | 41.0                | 17.2                |
| Appl Catal A 464-465(2013) 68-77 | Na2WO4/Mn/MgO      | 1123     | 2.0                            | 1.0                      |                     | 29.8                 | 49.2                 | 36.3                  | 14.5                | 50.8                | 15.1                |
| Appl Catal A 464-465(2013) 68-77 | TiO2-MgO           | 1123     | 2.0                            | 1.0                      |                     | 25.0                 | 85.6                 | 8.6                   | 5.8                 | 14.4                | 3.6                 |
| Catal Commu 42 (2013) 50-53      | La-Ce-O            | 873      | 4.0                            | 1.0                      |                     | 9.0                  | 96.0                 |                       |                     | 4.0                 | 0.4                 |
| Catal Commu 42 (2013) 50-53      | La-Ce-O            | 923      | 4.0                            | 1.0                      |                     | 14.6                 | 82.0                 |                       |                     | 18.0                | 2.6                 |
| Catal Commu 42 (2013) 50-53      | La-Ce-O            | 973      | 4.0                            | 1.0                      |                     | 19.5                 | 65.5                 |                       |                     | 34.5                | 6.7                 |
| Catal Commu 42 (2013) 50-53      | La-Ce-O            | 1023     | 4.0                            | 1.0                      |                     | 20.6                 | 64.0                 |                       |                     | 36.0                | 7.4                 |
| Catal Commu 42 (2013) 50-53      | La-Ce-O            | 873      | 4.0                            | 1.0                      |                     | 15.8                 | 86.0                 |                       |                     | 14.0                | 2.2                 |
| Catal Commu 42 (2013) 50-53      | La-Ce-O            | 923      | 4.0                            | 1.0                      |                     | 19.8                 | 66.0                 |                       |                     | 34.0                | 6.7                 |
| Catal Commu 42 (2013) 50-53      | La-Ce-O            | 973      | 4.0                            | 1.0                      |                     | 22.0                 | 59.0                 |                       |                     | 41.0                | 9.0                 |
| Catal Commu 42 (2013) 50-53      | La-Ce-O            | 1023     | 4.0                            | 1.0                      |                     | 23.6                 | 55.5                 |                       |                     | 44.5                | 10.5                |

**Table S1: Database with catalyst composition and their performance in OCM reaction under different conditions.**

| Reference                              | Catalyst       | Temp., K | $p(\text{CH}_4)/p(\text{O}_2)$ | $p_{\text{total}}$ , bar | $X(\text{O}_2)$ , % | $X(\text{CH}_4)$ , % | $S(\text{CO}_x)$ , % | $S(\text{C}_2^-)$ , % | $S(\text{C}_2^-)$ , % | $S(\text{C}_2)$ , % | $Y(\text{C}_2)$ , % |
|----------------------------------------|----------------|----------|--------------------------------|--------------------------|---------------------|----------------------|----------------------|-----------------------|-----------------------|---------------------|---------------------|
| ChemCatChem 5 (2013) 697-700           | Na-W-Mn/SiO2   | 1103     | 2.0                            | 1.0                      |                     | 47.0                 | 53.2                 |                       |                       | 42.6                | 20.0                |
| ChemCatChem 5 (2013) 2809-2812         | Ce-LaO3        | 1083     | 7.0                            | 1.0                      |                     | 22.0                 | 32.0                 |                       |                       | 68.0                | 15.0                |
| ChemCatChem 5 (2013) 2809-2812         | Ce-LaO3        | 1063     | 9.0                            | 1.0                      |                     | 19.0                 | 28.0                 |                       |                       | 72.0                | 13.7                |
| ChemCatChem 5 (2013) 2809-2812         | Ce-LaO3        | 1113     | 11.0                           | 1.0                      |                     | 17.5                 | 23.0                 |                       |                       | 77.0                | 13.5                |
| ChemCatChem 5 (2013) 3725-3735         | MgO            | 923      | 3.0                            | 1.0                      |                     | 3.2                  | 100.0                |                       |                       | 0.0                 | 0.0                 |
| ChemCatChem 5 (2013) 3725-3735         | MgO            | 923      | 3.0                            | 1.0                      |                     | 3.0                  | 100.0                |                       |                       | 0.0                 | 0.0                 |
| ChemCatChem 5 (2013) 3725-3735         | La2O3          | 923      | 3.0                            | 1.0                      |                     | 28.1                 | 55.8                 |                       |                       | 44.2                | 12.4                |
| ChemCatChem 5 (2013) 3725-3735         | La/MgO         | 923      | 3.0                            | 1.0                      |                     | 25.4                 | 62.2                 |                       |                       | 37.8                | 9.6                 |
| ChemCatChem 5 (2013) 3725-3735         | La/MgO         | 923      | 3.0                            | 1.0                      |                     | 29.5                 | 59.5                 |                       |                       | 40.5                | 11.9                |
| ChemCatChem 5 (2013) 3725-3735         | La/MgO         | 923      | 3.0                            | 1.0                      |                     | 28.1                 | 55.8                 |                       |                       | 44.2                | 12.4                |
| ChemCatChem 5 (2013) 3725-3735         | La/MgO         | 923      | 3.0                            | 1.0                      |                     | 32.2                 | 50.3                 |                       |                       | 49.7                | 16.0                |
| ChemCatChem 5 (2013) 3725-3735         | La/MgO         | 923      | 3.0                            | 1.0                      |                     | 32.1                 | 50.0                 |                       |                       | 50.0                | 16.1                |
| ChemCatChem 5 (2013) 3725-3735         | La/MgO         | 923      | 3.0                            | 1.0                      |                     | 31.5                 | 51.3                 |                       |                       | 48.7                | 15.3                |
| ChemCatChem 5 (2013) 3725-3735         | La/MgO         | 923      | 3.0                            | 1.0                      |                     | 32.3                 | 52.0                 |                       |                       | 48.0                | 15.5                |
| Fuel 106 (2013) 851-857                | Na2WO4/Mn/SiO2 | 1033     | 3.5                            | 1.0                      |                     | 20.0                 | 60.0                 |                       |                       | 40.0                | 8.0                 |
| Fuel 106 (2013) 851-857                | Na2WO4/Mn/SiO2 | 1063     | 3.5                            | 1.0                      |                     | 24.0                 | 59.0                 |                       |                       | 41.0                | 9.8                 |
| Fuel 106 (2013) 851-857                | Na2WO4/Mn/SiO2 | 1093     | 3.5                            | 1.0                      |                     | 31.0                 | 54.0                 |                       |                       | 46.0                | 14.3                |
| Fuel 106 (2013) 851-857                | Na2WO4/Mn/SiO2 | 1123     | 3.5                            | 1.0                      |                     | 33.0                 | 55.0                 |                       |                       | 45.0                | 14.9                |
| Fuel Proc Techn 115 (2013) 79-87       | Na2WO4/Mn/SiO2 | 1123     | 3.0                            | 1.0                      |                     | 37.0                 | 43.0                 |                       |                       | 57.0                | 21.1                |
| Fuel Proc Techn 115 (2013) 79-87       | Na2WO4/Mn/SiO2 | 1123     | 4.0                            | 1.0                      |                     | 30.0                 | 38.0                 |                       |                       | 62.0                | 18.6                |
| Fuel Proc Techn 115 (2013) 79-87       | Na2WO4/Mn/SiO2 | 1123     | 5.0                            | 1.0                      |                     | 25.0                 | 35.0                 |                       |                       | 65.0                | 16.3                |
| Fuel Proc Techn 115 (2013) 79-87       | Na2WO4/Mn/SiO2 | 1123     | 6.0                            | 1.0                      |                     | 22.0                 | 33.0                 |                       |                       | 67.0                | 14.7                |
| Fuel Proc Techn 115 (2013) 79-87       | Na2WO4/Mn/SiO2 | 1048     | 4.0                            | 1.0                      |                     | 20.5                 | 54.0                 |                       |                       | 46.0                | 9.4                 |
| Fuel Proc Techn 115 (2013) 79-87       | Na2WO4/Mn/SiO2 | 1073     | 4.0                            | 1.0                      |                     | 24.0                 | 46.0                 |                       |                       | 54.0                | 13.0                |
| Fuel Proc Techn 115 (2013) 79-87       | Na2WO4/Mn/SiO2 | 1098     | 4.0                            | 1.0                      |                     | 27.5                 | 42.0                 |                       |                       | 58.0                | 16.0                |
| Nanoscale 5 (2013) 10844-10848         | La2O3          | 723      | 3.0                            | 1.0                      |                     | 26.0                 | 62.0                 |                       |                       | 38.0                | 9.9                 |
| Nanoscale 5 (2013) 10844-10848         | La2O3          | 923      | 3.0                            | 1.0                      |                     | 26.0                 | 57.5                 |                       |                       | 42.5                | 11.1                |
| Pol J Chem Tech 15 (2013) 22-26        | CeO2           | 1073     | 3.7                            | 1.0                      |                     | 13.2                 | 55.9                 | 10.2                  | 33.9                  | 44.1                | 5.8                 |
| Pol J Chem Tech 15 (2013) 22-26        | Ca/CeO2        | 1073     | 3.7                            | 1.0                      |                     | 19.4                 | 63.0                 | 13.5                  | 22.6                  | 36.1                | 7.0                 |
| Pol J Chem Tech 15 (2013) 22-26        | La/CeO2        | 1073     | 3.7                            | 1.0                      |                     | 18.4                 | 69.3                 | 12.4                  | 17.8                  | 30.2                | 5.6                 |
| Reac Kinet Mech Cat 110 (2013) 373-385 | Li/MgO         | 1023     | 2.0                            | 1.0                      |                     | 44.2                 | 60.1                 | 28.5                  | 11.4                  | 39.9                | 17.6                |
| Reac Kinet Mech Cat 110 (2013) 373-385 | Li/MgO         | 948      | 2.0                            | 1.0                      |                     | 40.0                 | 56.7                 | 35.1                  | 8.2                   | 43.3                | 17.3                |
| Reac Kinet Mech Cat 110 (2013) 373-385 | Li/MgO         | 998      | 2.0                            | 1.0                      |                     | 35.1                 | 39.2                 | 50.9                  | 9.9                   | 60.8                | 21.4                |
| Russ J Appl Chem 86 (2013) 458-461     | Na-Mn/SiO2     | 923      | 3.0                            | 1.0                      |                     | 9.0                  | 60.0                 |                       |                       | 40.0                | 3.6                 |
| Russ J Appl Chem 86 (2013) 458-461     | Na-Mn/SiO2     | 973      | 3.0                            | 1.0                      |                     | 20.0                 | 59.0                 |                       |                       | 41.0                | 8.2                 |
| Russ J Appl Chem 86 (2013) 458-461     | Na-Mn/SiO2     | 1023     | 3.0                            | 1.0                      |                     | 18.5                 | 59.0                 |                       |                       | 41.0                | 7.6                 |
| Russ J Appl Chem 86 (2013) 458-461     | Na-Mn/Al2O3    | 973      | 3.0                            | 1.0                      |                     | 9.0                  | 97.0                 |                       |                       | 3.0                 | 0.3                 |
| Russ J Appl Chem 86 (2013) 458-461     | Na-Mn/Al2O3    | 1023     | 3.0                            | 1.0                      |                     | 9.0                  | 93.0                 |                       |                       | 7.0                 | 0.6                 |
| Russ J Appl Chem 86 (2013) 458-461     | Na-Mn/Al2O3    | 1073     | 3.0                            | 1.0                      |                     | 8.5                  | 97.4                 |                       |                       | 2.6                 | 0.2                 |
| Russ J Appl Chem 86 (2013) 458-461     | Na-Mn/NaX      | 973      | 3.0                            | 1.0                      |                     | 7.3                  | 94.0                 |                       |                       | 6.0                 | 0.4                 |
| Russ J Appl Chem 86 (2013) 458-461     | Na-Mn/NaX      | 1023     | 3.0                            | 1.0                      |                     | 9.0                  | 91.0                 |                       |                       | 9.0                 | 0.8                 |
| Patent 11.06.2013: US2013/0178680 A1   | MgO-TiO2       | 998      | 5.0                            | 1.0                      |                     | 2.8                  | 76.5                 |                       |                       | 23.5                | 0.7                 |
| Patent 11.06.2013: US2013/0178680 A1   | MgO-TiO2       | 1023     | 5.0                            | 1.0                      |                     | 9.9                  | 76.1                 |                       |                       | 23.9                | 2.4                 |

**Table S1: Database with catalyst composition and their performance in OCM reaction under different conditions.**

| Reference                            | Catalyst | Temp., K | $p(\text{CH}_4)/p(\text{O}_2)$ | $p_{\text{total}}$ , bar | $X(\text{O}_2)$ , % | $X(\text{CH}_4)$ , % | $S(\text{CO}_x)$ , % | $S(\text{C}_2^-)$ , % | $S(\text{C}_2^-)$ , % | $S(\text{C}_2)$ , % | $Y(\text{C}_2)$ , % |
|--------------------------------------|----------|----------|--------------------------------|--------------------------|---------------------|----------------------|----------------------|-----------------------|-----------------------|---------------------|---------------------|
| Patent 11.06.2013: US2013/0178680 A1 | MgO-TiO2 | 1048     | 5.0                            | 1.0                      |                     | 22.6                 | 62.5                 |                       |                       | 37.5                | 8.5                 |
| Patent 11.06.2013: US2013/0178680 A1 | MgO-TiO2 | 1073     | 5.0                            | 1.0                      |                     | 34.0                 | 59.8                 |                       |                       | 40.2                | 13.7                |
| Patent 11.06.2013: US2013/0178680 A1 | MgO-TiO2 | 1098     | 5.0                            | 1.0                      |                     | 37.5                 | 59.4                 |                       |                       | 40.6                | 15.2                |
| Patent 11.06.2013: US2013/0178680 A1 | MgO-TiO2 | 1123     | 5.0                            | 1.0                      |                     | 39.1                 | 58.7                 |                       |                       | 41.3                | 16.1                |
| Patent 11.06.2013: US2013/0178680 A1 | MgO-TiO2 | 998      | 5.0                            | 1.0                      |                     | 11.2                 | 72.5                 |                       |                       | 27.5                | 3.1                 |
| Patent 11.06.2013: US2013/0178680 A1 | MgO-TiO2 | 1023     | 5.0                            | 1.0                      |                     | 25.7                 | 58.1                 |                       |                       | 41.9                | 10.8                |
| Patent 11.06.2013: US2013/0178680 A1 | MgO-TiO2 | 1048     | 5.0                            | 1.0                      |                     | 37.1                 | 55.4                 |                       |                       | 44.6                | 16.5                |
| Patent 11.06.2013: US2013/0178680 A1 | MgO-TiO2 | 1073     | 5.0                            | 1.0                      |                     | 41.4                 | 56.9                 |                       |                       | 43.1                | 17.8                |
| Patent 11.06.2013: US2013/0178680 A1 | MgO-TiO2 | 1098     | 5.0                            | 1.0                      |                     | 42.4                 | 57.3                 |                       |                       | 42.7                | 18.1                |
| Patent 11.06.2013: US2013/0178680 A1 | MgO-TiO2 | 1123     | 5.0                            | 1.0                      |                     | 42.4                 | 58.3                 |                       |                       | 41.7                | 17.7                |
| Patent 11.06.2013: US2013/0178680 A1 | MgO-TiO2 | 998      | 5.0                            | 1.0                      |                     | 1.4                  | 68.9                 |                       |                       | 31.1                | 0.4                 |
| Patent 11.06.2013: US2013/0178680 A1 | MgO-TiO2 | 1023     | 5.0                            | 1.0                      |                     | 4.3                  | 62.8                 |                       |                       | 37.2                | 1.6                 |
| Patent 11.06.2013: US2013/0178680 A1 | MgO-TiO2 | 1048     | 5.0                            | 1.0                      |                     | 9.2                  | 49.4                 |                       |                       | 50.6                | 4.7                 |
| Patent 11.06.2013: US2013/0178680 A1 | MgO-TiO2 | 1073     | 5.0                            | 1.0                      |                     | 15.8                 | 38.2                 |                       |                       | 61.8                | 9.8                 |
| Patent 11.06.2013: US2013/0178680 A1 | MgO-TiO2 | 1098     | 5.0                            | 1.0                      |                     | 40.9                 | 56.0                 |                       |                       | 44.0                | 18.0                |
| Patent 11.06.2013: US2013/0178680 A1 | MgO-TiO2 | 1123     | 5.0                            | 1.0                      |                     | 42.0                 | 59.0                 |                       |                       | 41.0                | 17.2                |
| Patent 11.06.2013: US2013/0178680 A1 | TiO2     | 998      | 2.0                            | 1.0                      |                     | 1.4                  | 71.4                 |                       |                       | 28.6                | 0.4                 |
| Patent 11.06.2013: US2013/0178680 A1 | MgO-TiO2 | 998      | 2.0                            | 1.0                      |                     | 2.8                  | 76.5                 |                       |                       | 23.5                | 0.7                 |
| Patent 11.06.2013: US2013/0178680 A1 | MgO-TiO2 | 998      | 2.0                            | 1.0                      |                     | 11.2                 | 72.5                 |                       |                       | 27.5                | 3.1                 |
| Patent 11.06.2013: US2013/0178680 A1 | MgO-TiO2 | 998      | 2.0                            | 1.0                      |                     | 1.4                  | 68.9                 |                       |                       | 31.1                | 0.4                 |
| Patent 11.06.2013: US2013/0178680 A1 | MgO      | 998      | 2.0                            | 1.0                      |                     | 3.8                  | 88.8                 |                       |                       | 11.2                | 0.4                 |
| Patent 11.06.2013: US2013/0178680 A1 | TiO2     | 1023     | 2.0                            | 1.0                      |                     | 2.1                  | 52.6                 |                       |                       | 47.4                | 1.0                 |
| Patent 11.06.2013: US2013/0178680 A1 | MgO-TiO2 | 1023     | 2.0                            | 1.0                      |                     | 9.9                  | 76.1                 |                       |                       | 23.9                | 2.4                 |
| Patent 11.06.2013: US2013/0178680 A1 | MgO-TiO2 | 1023     | 2.0                            | 1.0                      |                     | 25.7                 | 58.1                 |                       |                       | 41.9                | 10.8                |
| Patent 11.06.2013: US2013/0178680 A1 | MgO-TiO2 | 1023     | 2.0                            | 1.0                      |                     | 4.3                  | 62.8                 |                       |                       | 37.2                | 1.6                 |
| Patent 11.06.2013: US2013/0178680 A1 | MgO      | 1023     | 2.0                            | 1.0                      |                     | 4.9                  | 65.1                 |                       |                       | 34.9                | 1.7                 |
| Patent 11.06.2013: US2013/0178680 A1 | TiO2     | 1048     | 2.0                            | 1.0                      |                     | 5.0                  | 50.5                 |                       |                       | 49.5                | 2.5                 |
| Patent 11.06.2013: US2013/0178680 A1 | MgO-TiO2 | 1048     | 2.0                            | 1.0                      |                     | 22.6                 | 62.5                 |                       |                       | 37.5                | 8.5                 |
| Patent 11.06.2013: US2013/0178680 A1 | MgO-TiO2 | 1048     | 2.0                            | 1.0                      |                     | 37.1                 | 55.4                 |                       |                       | 44.6                | 16.5                |
| Patent 11.06.2013: US2013/0178680 A1 | MgO-TiO2 | 1048     | 2.0                            | 1.0                      |                     | 9.2                  | 49.4                 |                       |                       | 50.6                | 4.7                 |
| Patent 11.06.2013: US2013/0178680 A1 | MgO      | 1048     | 2.0                            | 1.0                      |                     | 10.6                 | 59.8                 |                       |                       | 40.2                | 4.3                 |
| Patent 11.06.2013: US2013/0178680 A1 | TiO2     | 1073     | 2.0                            | 1.0                      |                     | 11.8                 | 48.9                 |                       |                       | 51.1                | 6.0                 |
| Patent 11.06.2013: US2013/0178680 A1 | MgO-TiO2 | 1073     | 2.0                            | 1.0                      |                     | 34.0                 | 59.8                 |                       |                       | 40.2                | 13.7                |
| Patent 11.06.2013: US2013/0178680 A1 | MgO-TiO2 | 1073     | 2.0                            | 1.0                      |                     | 41.4                 | 56.9                 |                       |                       | 43.1                | 17.8                |
| Patent 11.06.2013: US2013/0178680 A1 | MgO-TiO2 | 1073     | 2.0                            | 1.0                      |                     | 15.8                 | 38.2                 |                       |                       | 61.8                | 9.8                 |
| Patent 11.06.2013: US2013/0178680 A1 | MgO      | 1073     | 2.0                            | 1.0                      |                     | 11.9                 | 46.9                 |                       |                       | 53.1                | 6.3                 |
| Patent 11.06.2013: US2013/0178680 A1 | TiO2     | 1098     | 2.0                            | 1.0                      |                     | 23.9                 | 48.6                 |                       |                       | 51.4                | 12.3                |
| Patent 11.06.2013: US2013/0178680 A1 | MgO-TiO2 | 1098     | 2.0                            | 1.0                      |                     | 37.5                 | 59.4                 |                       |                       | 40.6                | 15.2                |
| Patent 11.06.2013: US2013/0178680 A1 | MgO-TiO2 | 1098     | 2.0                            | 1.0                      |                     | 42.4                 | 57.3                 |                       |                       | 42.7                | 18.1                |
| Patent 11.06.2013: US2013/0178680 A1 | MgO-TiO2 | 1098     | 2.0                            | 1.0                      |                     | 40.9                 | 56.0                 |                       |                       | 44.0                | 18.0                |
| Patent 11.06.2013: US2013/0178680 A1 | MgO      | 1098     | 2.0                            | 1.0                      |                     | 16.3                 | 43.1                 |                       |                       | 56.9                | 9.3                 |
| Patent 11.06.2013: US2013/0178680 A1 | TiO2     | 1123     | 2.0                            | 1.0                      |                     | 37.3                 | 54.4                 |                       |                       | 45.6                | 17.0                |
| Patent 11.06.2013: US2013/0178680 A1 | MgO-TiO2 | 1123     | 2.0                            | 1.0                      |                     | 39.1                 | 58.7                 |                       |                       | 41.3                | 16.1                |

**Table S1: Database with catalyst composition and their performance in OCM reaction under different conditions.**

| Reference                            | Catalyst        | Temp., K | $p(\text{CH}_4)/p(\text{O}_2)$ | $p_{\text{total}}$ , bar | $X(\text{O}_2)$ , % | $X(\text{CH}_4)$ , % | $S(\text{CO}_x)$ , % | $S(\text{C}_2^-)$ , % | $S(\text{C}_2)$ , % | $S(\text{C}_2)$ , % | $Y(\text{C}_2)$ , % |
|--------------------------------------|-----------------|----------|--------------------------------|--------------------------|---------------------|----------------------|----------------------|-----------------------|---------------------|---------------------|---------------------|
| Patent 11.06.2013: US2013/0178680 A1 | MgO-TiO2        | 1123     | 2.0                            | 1.0                      |                     | 42.4                 | 58.3                 |                       |                     | 41.7                | 17.7                |
| Patent 11.06.2013: US2013/0178680 A1 | MgO-TiO2        | 1123     | 2.0                            | 1.0                      |                     | 42.0                 | 59.0                 |                       |                     | 41.0                | 17.2                |
| Patent 11.06.2013: US2013/0178680 A1 | MgO             | 1123     | 2.0                            | 1.0                      |                     | 29.8                 | 49.2                 |                       |                     | 50.8                | 15.1                |
| ACS Catal 4 (2014) 1972              | Sm/MgO          | 973      | 4.0                            | 1.0                      |                     | 21.3                 | 48.8                 | 26.3                  | 25.3                | 51.6                | 11.0                |
| ACS Catal 4 (2014) 1972              | Sm/MgO          | 973      | 4.0                            | 1.0                      |                     | 20.8                 | 48.8                 | 23.8                  | 27.4                | 51.2                | 10.6                |
| ACS Catal 4 (2014) 1972              | SmLi/MgO        | 973      | 4.0                            | 1.0                      |                     | 21.2                 | 38.2                 | 38.1                  | 23.7                | 61.8                | 13.1                |
| ACS Catal 4 (2014) 1972              | SmLi/MgO        | 973      | 4.0                            | 1.0                      |                     | 20.4                 | 44.7                 | 32.3                  | 23.0                | 55.3                | 11.3                |
| ACS Catal 4 (2014) 1972              | SmLi/MgO        | 973      | 4.0                            | 1.0                      |                     | 21.1                 | 39.0                 | 38.2                  | 22.8                | 61.0                | 12.9                |
| ACS Catal 4 (2014) 1972              | SmLi/MgO        | 973      | 4.0                            | 1.0                      |                     | 20.8                 | 40.1                 | 38.8                  | 21.1                | 59.9                | 12.5                |
| ACS Catal 4 (2014) 1972              | SmLi/MgO        | 973      | 4.0                            | 1.0                      |                     | 22.2                 | 43.0                 | 33.6                  | 23.4                | 57.0                | 12.7                |
| ACS Catal 4 (2014) 1972              | SmLi/MgO        | 973      | 4.0                            | 1.0                      |                     | 22.0                 | 41.0                 | 31.8                  | 27.2                | 59.0                | 13.0                |
| ACS Catal 4 (2014) 1972              | Tb/MgO          | 973      | 4.0                            | 1.0                      |                     | 17.2                 | 61.4                 | 16.3                  | 22.3                | 38.6                | 6.6                 |
| ACS Catal 4 (2014) 1972              | Tb/MgO          | 973      | 4.0                            | 1.0                      |                     | 18.6                 | 56.1                 | 17.7                  | 26.2                | 43.9                | 8.2                 |
| ACS Catal 4 (2014) 1972              | TbLi/MgO        | 973      | 4.0                            | 1.0                      |                     | 21.8                 | 38.3                 | 37.9                  | 23.8                | 61.7                | 13.5                |
| ACS Catal 4 (2014) 1972              | TbLi/MgO        | 973      | 4.0                            | 1.0                      |                     | 22.1                 | 43.0                 | 29.7                  | 27.3                | 57.0                | 12.6                |
| ACS Catal 4 (2014) 1972              | TbLi/MgO        | 973      | 4.0                            | 1.0                      |                     | 23.9                 | 37.8                 | 36.8                  | 25.4                | 62.2                | 14.9                |
| ACS Catal 4 (2014) 1972              | TbLi/MgO        | 973      | 4.0                            | 1.0                      |                     | 22.1                 | 38.0                 | 37.9                  | 24.1                | 62.0                | 13.7                |
| ACS Catal 4 (2014) 1972              | TbLi/MgO        | 973      | 4.0                            | 1.0                      |                     | 22.0                 | 43.4                 | 28.8                  | 27.8                | 56.6                | 12.5                |
| ACS Catal 4 (2014) 1972              | TbLi/MgO        | 973      | 4.0                            | 1.0                      |                     | 21.6                 | 45.3                 | 25.7                  | 29.0                | 54.7                | 11.8                |
| Appl Catal A 485(2014) 10-19         | SrTiO3          | 1123     | 2.0                            | 1.0                      |                     | 16.5                 | 53.2                 | 15.1                  | 31.7                | 46.8                | 7.7                 |
| Appl Catal A 485(2014) 10-19         | SrTiO,9PbO,1O3  | 1123     | 2.0                            | 1.0                      |                     | 15.8                 | 34.9                 | 19.1                  | 46.0                | 65.1                | 10.3                |
| Appl Catal A 485(2014) 10-19         | SrTiO,9MgO,1O3  | 1123     | 2.0                            | 1.0                      |                     | 39.9                 | 49.9                 | 22.8                  | 27.3                | 50.1                | 20.0                |
| Appl Catal A 485(2014) 10-19         | SrTiO,9CaO,1O3  | 1123     | 2.0                            | 1.0                      |                     | 12.3                 | 31.5                 | 16.3                  | 52.2                | 68.5                | 8.4                 |
| Appl Catal A 485(2014) 10-19         | SrTiO,9BaO,1O3  | 1123     | 2.0                            | 1.0                      |                     | 9.8                  | 32.8                 | 15.3                  | 51.9                | 67.2                | 6.6                 |
| Appl Catal A 485(2014) 10-19         | SrTiO,9AlO,1O3  | 1123     | 2.0                            | 1.0                      |                     | 27.9                 | 36.9                 | 24.3                  | 38.8                | 63.1                | 17.6                |
| Appl Catal A 485(2014) 10-19         | Sr2TiO4         | 1123     | 2.0                            | 1.0                      |                     | 20.3                 | 40.3                 | 22.1                  | 37.6                | 59.7                | 12.1                |
| Appl Catal A 485(2014) 10-19         | Sr2TiO,9MgO,1O4 | 1123     | 2.0                            | 1.0                      |                     | 29.7                 | 34.7                 | 28.4                  | 36.9                | 65.3                | 19.4                |
| Appl Catal A 485(2014) 10-19         | Sr2TiO,9AlO,1O4 | 1123     | 2.0                            | 1.0                      |                     | 18.5                 | 29.8                 | 19.5                  | 50.7                | 70.2                | 13.0                |
| Appl Catal A 485(2014) 10-19         | SrTiO3          | 1123     | 4.0                            | 1.0                      |                     | 15.0                 | 37.4                 | 20.9                  | 41.7                | 62.6                | 9.4                 |
| Appl Catal A 485(2014) 10-19         | SrTiO,9PbO,1O3  | 1123     | 4.0                            | 1.0                      |                     | 18.3                 | 28.3                 | 21.7                  | 50.0                | 71.7                | 13.1                |
| Appl Catal A 485(2014) 10-19         | SrTiO,9MgO,1O3  | 1123     | 4.0                            | 1.0                      |                     | 24.2                 | 36.0                 | 27.8                  | 36.2                | 64.0                | 15.5                |
| Appl Catal A 485(2014) 10-19         | SrTiO,9CaO,1O3  | 1123     | 4.0                            | 1.0                      |                     | 13.6                 | 22.9                 | 21.4                  | 55.7                | 77.1                | 10.5                |
| Appl Catal A 485(2014) 10-19         | SrTiO,9BaO,1O3  | 1123     | 4.0                            | 1.0                      |                     | 12.3                 | 26.3                 | 17.1                  | 56.6                | 73.7                | 9.1                 |
| Appl Catal A 485(2014) 10-19         | SrTiO,9AlO,1O3  | 1123     | 4.0                            | 1.0                      |                     | 20.3                 | 25.2                 | 28.8                  | 46.0                | 74.8                | 15.2                |
| Appl Catal A 485(2014) 10-19         | Sr2TiO4         | 1123     | 4.0                            | 1.0                      |                     | 21.1                 | 31.3                 | 27.5                  | 41.2                | 68.7                | 14.5                |
| Appl Catal A 485(2014) 10-19         | Sr2TiO,9MgO,1O4 | 1123     | 4.0                            | 1.0                      |                     | 23.9                 | 24.4                 | 31.5                  | 44.1                | 75.6                | 18.1                |
| Appl Catal A 485(2014) 10-19         | Sr2TiO,9AlO,1O4 | 1123     | 4.0                            | 1.0                      |                     | 17.4                 | 20.8                 | 23.3                  | 55.9                | 79.2                | 13.8                |
| Appl Catal A 485(2014) 10-19         | SrTiO3          | 1173     | 2.0                            | 1.0                      |                     | 15.4                 | 49.3                 | 14.5                  | 36.2                | 50.7                | 7.8                 |
| Appl Catal A 485(2014) 10-19         | SrTiO,9PbO,1O3  | 1173     | 2.0                            | 1.0                      |                     | 22.0                 | 45.4                 | 21.8                  | 32.8                | 54.6                | 12.0                |
| Appl Catal A 485(2014) 10-19         | SrTiO,9MgO,1O3  | 1173     | 2.0                            | 1.0                      |                     | 35.6                 | 55.3                 | 20.3                  | 24.4                | 44.7                | 15.9                |
| Appl Catal A 485(2014) 10-19         | SrTiO,9CaO,1O3  | 1173     | 2.0                            | 1.0                      |                     | 15.6                 | 32.8                 | 21.7                  | 45.5                | 67.2                | 10.5                |
| Appl Catal A 485(2014) 10-19         | SrTiO,9BaO,1O3  | 1173     | 2.0                            | 1.0                      |                     | 15.4                 | 29.2                 | 19.7                  | 51.1                | 70.8                | 10.9                |
| Appl Catal A 485(2014) 10-19         | SrTiO,9AlO,1O3  | 1173     | 2.0                            | 1.0                      |                     | 34.5                 | 49.5                 | 25.3                  | 25.3                | 50.5                | 17.4                |

**Table S1: Database with catalyst composition and their performance in OCM reaction under different conditions.**

| Reference                       | Catalyst        | Temp., K | $p(\text{CH}_4)/p(\text{O}_2)$ | $p_{\text{total}}$ , bar | $X(\text{O}_2)$ , % | $X(\text{CH}_4)$ , % | $S(\text{CO}_x)$ , % | $S(\text{C}_2^-)$ , % | $S(\text{C}_2)$ , % | $S(\text{C}_2)$ , % | $Y(\text{C}_2)$ , % |
|---------------------------------|-----------------|----------|--------------------------------|--------------------------|---------------------|----------------------|----------------------|-----------------------|---------------------|---------------------|---------------------|
| Appl Catal A 485(2014) 10-19    | Sr2TiO4         | 1173     | 2.0                            | 1.0                      |                     | 32.6                 | 43.0                 | 25.9                  | 31.1                | 57.0                | 18.6                |
| Appl Catal A 485(2014) 10-19    | Sr2TiO,9MgO,1O4 | 1173     | 2.0                            | 1.0                      |                     | 37.1                 | 41.8                 | 29.1                  | 29.1                | 58.2                | 21.6                |
| Appl Catal A 485(2014) 10-19    | Sr2TiO,9AlO,1O4 | 1173     | 2.0                            | 1.0                      |                     | 26.7                 | 30.6                 | 30.2                  | 39.2                | 69.4                | 18.5                |
| Appl Catal A 485(2014) 10-19    | SrTiO3          | 1173     | 4.0                            | 1.0                      |                     | 19.4                 | 34.1                 | 23.5                  | 42.4                | 65.9                | 12.8                |
| Appl Catal A 485(2014) 10-19    | SrTiO,9PbO,1O3  | 1173     | 4.0                            | 1.0                      |                     | 21.4                 | 35.5                 | 24.8                  | 39.7                | 64.5                | 13.8                |
| Appl Catal A 485(2014) 10-19    | SrTiO,9MgO,1O3  | 1173     | 4.0                            | 1.0                      |                     | 22.1                 | 44.3                 | 24.2                  | 31.5                | 55.7                | 12.3                |
| Appl Catal A 485(2014) 10-19    | SrTiO,9CaO,1O3  | 1173     | 4.0                            | 1.0                      |                     | 14.6                 | 26.5                 | 21.6                  | 51.9                | 73.5                | 10.7                |
| Appl Catal A 485(2014) 10-19    | SrTiO,9BaO,1O3  | 1173     | 4.0                            | 1.0                      |                     | 17.0                 | 21.6                 | 28.0                  | 50.4                | 78.4                | 13.3                |
| Appl Catal A 485(2014) 10-19    | SrTiO,9AlO,1O3  | 1173     | 4.0                            | 1.0                      |                     | 24.3                 | 32.8                 | 30.5                  | 36.7                | 67.2                | 16.3                |
| Appl Catal A 485(2014) 10-19    | Sr2TiO4         | 1173     | 4.0                            | 1.0                      |                     | 25.3                 | 31.5                 | 29.8                  | 38.7                | 68.5                | 17.3                |
| Appl Catal A 485(2014) 10-19    | Sr2TiO,9MgO,1O4 | 1173     | 4.0                            | 1.0                      |                     | 28.2                 | 28.8                 | 33.9                  | 37.3                | 71.2                | 20.1                |
| Appl Catal A 485(2014) 10-19    | Sr2TiO,9AlO,1O4 | 1173     | 4.0                            | 1.0                      |                     | 24.3                 | 25.2                 | 34.0                  | 40.8                | 74.8                | 18.2                |
| Catal Commu 50 (2014) 54-58     | Rh-TiO2         | 1023     | 5.0                            | 1.0                      |                     | 25.5                 | 100.0                |                       |                     | 0.0                 | 0.0                 |
| Catal Commu 50 (2014) 54-58     | Rh-TiO2         | 1048     | 5.0                            | 1.0                      |                     | 27.0                 | 100.0                |                       |                     | 0.0                 | 0.0                 |
| Catal Commu 50 (2014) 54-58     | Rh-TiO2         | 1073     | 5.0                            | 1.0                      |                     | 27.5                 | 100.0                |                       |                     | 0.0                 | 0.0                 |
| Catal Commu 50 (2014) 54-58     | Rh-TiO2         | 1098     | 5.0                            | 1.0                      |                     | 28.5                 | 100.0                |                       |                     | 0.0                 | 0.0                 |
| Catal Commu 50 (2014) 54-58     | Rh-TiO2         | 1123     | 5.0                            | 1.0                      |                     | 29.0                 | 100.0                |                       |                     | 0.0                 | 0.0                 |
| Catal Commu 50 (2014) 54-58     | Mn-TiO2         | 1023     | 5.0                            | 1.0                      |                     | 14.0                 | 64.0                 |                       |                     | 36.0                | 5.0                 |
| Catal Commu 50 (2014) 54-58     | Mn-TiO2         | 1048     | 5.0                            | 1.0                      |                     | 15.0                 | 52.0                 |                       |                     | 48.0                | 7.2                 |
| Catal Commu 50 (2014) 54-58     | Mn-TiO2         | 1073     | 5.0                            | 1.0                      |                     | 17.5                 | 46.0                 |                       |                     | 54.0                | 9.5                 |
| Catal Commu 50 (2014) 54-58     | Mn-TiO2         | 1098     | 5.0                            | 1.0                      |                     | 18.0                 | 45.0                 |                       |                     | 55.0                | 9.9                 |
| Catal Commu 50 (2014) 54-58     | Mn-TiO2         | 1123     | 5.0                            | 1.0                      |                     | 20.0                 | 45.0                 |                       |                     | 55.0                | 11.0                |
| Catal Commu 50 (2014) 54-58     | V-TiO2          | 1023     | 5.0                            | 1.0                      |                     | 3.0                  | 97.5                 |                       |                     | 2.5                 | 0.1                 |
| Catal Commu 50 (2014) 54-58     | V-TiO2          | 1048     | 5.0                            | 1.0                      |                     | 4.0                  | 96.0                 |                       |                     | 4.0                 | 0.2                 |
| Catal Commu 50 (2014) 54-58     | V-TiO2          | 1073     | 5.0                            | 1.0                      |                     | 6.0                  | 95.0                 |                       |                     | 5.0                 | 0.3                 |
| Catal Commu 50 (2014) 54-58     | V-TiO2          | 1098     | 5.0                            | 1.0                      |                     | 11.0                 | 95.0                 |                       |                     | 5.0                 | 0.6                 |
| Catal Commu 50 (2014) 54-58     | V-TiO2          | 1123     | 5.0                            | 1.0                      |                     | 12.5                 | 92.5                 |                       |                     | 7.5                 | 0.9                 |
| Catal Commu 50 (2014) 54-58     | TiO2            | 1023     | 5.0                            | 1.0                      |                     | 2.0                  | 62.0                 |                       |                     | 38.0                | 0.8                 |
| Catal Commu 50 (2014) 54-58     | TiO2            | 1048     | 5.0                            | 1.0                      |                     | 2.5                  | 63.0                 |                       |                     | 37.0                | 0.9                 |
| Catal Commu 50 (2014) 54-58     | TiO2            | 1073     | 5.0                            | 1.0                      |                     | 3.0                  | 61.0                 |                       |                     | 39.0                | 1.2                 |
| Catal Commu 50 (2014) 54-58     | TiO2            | 1098     | 5.0                            | 1.0                      |                     | 5.0                  | 62.0                 |                       |                     | 38.0                | 1.9                 |
| Catal Commu 50 (2014) 54-58     | TiO2            | 1123     | 5.0                            | 1.0                      |                     | 7.5                  | 57.0                 |                       |                     | 43.0                | 3.2                 |
| Catalysis Today 228 (2014) 5-14 | La2O3           | 1023     | 4.0                            | 1.0                      | 99.0                | 20.0                 | 54.0                 |                       |                     | 46.0                | 9.2                 |
| Catalysis Today 228 (2014) 5-14 | WO3/La2O3       | 1023     | 4.0                            | 1.0                      | 20.0                | 4.0                  | 52.0                 |                       |                     | 48.0                | 1.9                 |
| Catalysis Today 228 (2014) 5-14 | Mn/La2O3        | 1023     | 4.0                            | 1.0                      | 99.5                | 21.0                 | 58.0                 |                       |                     | 42.0                | 8.8                 |
| Catalysis Today 228 (2014) 5-14 | Na2WO4/La2O3    | 1023     | 4.0                            | 1.0                      | 66.0                | 13.0                 | 55.0                 |                       |                     | 45.0                | 5.9                 |
| Catalysis Today 228 (2014) 5-14 | Na2WO4/Mn/La2O3 | 1023     | 4.0                            | 1.0                      | 93.0                | 18.0                 | 66.0                 |                       |                     | 34.0                | 6.1                 |
| Catalysis Today 228 (2014) 5-14 | CaO             | 1023     | 4.0                            | 1.0                      | 68.0                | 12.0                 | 72.0                 |                       |                     | 28.0                | 3.4                 |
| Catalysis Today 228 (2014) 5-14 | WO3/CaO         | 1023     | 4.0                            | 1.0                      | 50.0                | 8.0                  | 68.0                 |                       |                     | 32.0                | 2.6                 |
| Catalysis Today 228 (2014) 5-14 | Mn/CaO          | 1023     | 4.0                            | 1.0                      | 100.0               | 16.0                 | 80.0                 |                       |                     | 20.0                | 3.2                 |
| Catalysis Today 228 (2014) 5-14 | Na2WO4/CaO      | 1023     | 4.0                            | 1.0                      | 58.0                | 10.0                 | 70.0                 |                       |                     | 30.0                | 3.0                 |
| Catalysis Today 228 (2014) 5-14 | Na2WO4/Mn/CaO   | 1023     | 4.0                            | 1.0                      | 99.0                | 18.0                 | 72.0                 |                       |                     | 28.0                | 5.0                 |
| Catalysis Today 228 (2014) 5-14 | Al2O3           | 1023     | 4.0                            | 1.0                      | 56.0                | 4.0                  | 87.0                 |                       |                     | 13.0                | 0.5                 |

**Table S1: Database with catalyst composition and their performance in OCM reaction under different conditions.**

| Reference                       | Catalyst                                                           | Temp., K | $p(\text{CH}_4)/p(\text{O}_2)$ | $p_{\text{total}}$ , bar | $X(\text{O}_2)$ , % | $X(\text{CH}_4)$ , % | $S(\text{CO}_x)$ , % | $S(\text{C}_2^-)$ , % | $S(\text{C}_2^-)$ , % | $S(\text{C}_2)$ , % | $Y(\text{C}_2)$ , % |
|---------------------------------|--------------------------------------------------------------------|----------|--------------------------------|--------------------------|---------------------|----------------------|----------------------|-----------------------|-----------------------|---------------------|---------------------|
| Catalysis Today 228 (2014) 5-14 | WO <sub>3</sub> /Al <sub>2</sub> O <sub>3</sub>                    | 1023     | 4.0                            | 1.0                      | 9.0                 | 1.0                  | 92.0                 |                       |                       | 8.0                 | 0.1                 |
| Catalysis Today 228 (2014) 5-14 | Mn/Al <sub>2</sub> O <sub>3</sub>                                  | 1023     | 4.0                            | 1.0                      | 99.0                | 13.0                 | 92.0                 |                       |                       | 8.0                 | 1.0                 |
| Catalysis Today 228 (2014) 5-14 | Na <sub>2</sub> WO <sub>4</sub> /Al <sub>2</sub> O <sub>3</sub>    | 1023     | 4.0                            | 1.0                      | 98.0                | 8.0                  | 98.0                 |                       |                       | 2.0                 | 0.2                 |
| Catalysis Today 228 (2014) 5-14 | Na <sub>2</sub> WO <sub>4</sub> /Mn/Al <sub>2</sub> O <sub>3</sub> | 1023     | 4.0                            | 1.0                      | 97.0                | 13.0                 | 75.0                 |                       |                       | 25.0                | 3.3                 |
| Catalysis Today 228 (2014) 5-14 | ZrO <sub>2</sub>                                                   | 1023     | 4.0                            | 1.0                      | 98.0                | 11.0                 | 78.0                 |                       |                       | 22.0                | 2.4                 |
| Catalysis Today 228 (2014) 5-14 | WO <sub>3</sub> /ZrO <sub>2</sub>                                  | 1023     | 4.0                            | 1.0                      | 7.0                 | 1.0                  | 60.0                 |                       |                       | 40.0                | 0.4                 |
| Catalysis Today 228 (2014) 5-14 | Mn/ZrO <sub>2</sub>                                                | 1023     | 4.0                            | 1.0                      | 100.0               | 15.0                 | 88.0                 |                       |                       | 12.0                | 1.8                 |
| Catalysis Today 228 (2014) 5-14 | Na <sub>2</sub> WO <sub>4</sub> /ZrO <sub>2</sub>                  | 1023     | 4.0                            | 1.0                      | 15.0                | 3.0                  | 56.0                 |                       |                       | 44.0                | 1.3                 |
| Catalysis Today 228 (2014) 5-14 | Na <sub>2</sub> WO <sub>4</sub> /Mn/ZrO <sub>2</sub>               | 1023     | 4.0                            | 1.0                      | 67.0                | 10.0                 | 79.0                 |                       |                       | 21.0                | 2.1                 |
| Catalysis Today 228 (2014) 5-14 | SiO <sub>2</sub>                                                   | 1023     | 4.0                            | 1.0                      | 11.0                | 1.0                  | 31.0                 |                       |                       | 69.0                | 0.7                 |
| Catalysis Today 228 (2014) 5-14 | WO <sub>3</sub> /SiO <sub>2</sub>                                  | 1023     | 4.0                            | 1.0                      | 6.0                 | 1.0                  | 17.0                 |                       |                       | 83.0                | 0.8                 |
| Catalysis Today 228 (2014) 5-14 | Mn/SiO <sub>2</sub>                                                | 1023     | 4.0                            | 1.0                      | 31.0                | 4.0                  | 77.0                 |                       |                       | 23.0                | 0.9                 |
| Catalysis Today 228 (2014) 5-14 | Na <sub>2</sub> WO <sub>4</sub> /SiO <sub>2</sub>                  | 1023     | 4.0                            | 1.0                      | 16.0                | 2.0                  | 43.0                 |                       |                       | 57.0                | 1.1                 |
| Catalysis Today 228 (2014) 5-14 | Na <sub>2</sub> WO <sub>4</sub> /Mn/SiO <sub>2</sub>               | 1023     | 4.0                            | 1.0                      | 37.0                | 7.0                  | 42.0                 |                       |                       | 58.0                | 4.1                 |
| Catalysis Today 228 (2014) 5-14 | SiC                                                                | 1023     | 4.0                            | 1.0                      | 4.0                 | 1.0                  | 52.0                 |                       |                       | 48.0                | 0.5                 |
| Catalysis Today 228 (2014) 5-14 | WO <sub>3</sub> /SiC                                               | 1023     | 4.0                            | 1.0                      | 3.0                 | 1.0                  | 44.0                 |                       |                       | 56.0                | 0.6                 |
| Catalysis Today 228 (2014) 5-14 | Mn/SiC                                                             | 1023     | 4.0                            | 1.0                      | 42.0                | 5.0                  | 83.0                 |                       |                       | 17.0                | 0.9                 |
| Catalysis Today 228 (2014) 5-14 | Na <sub>2</sub> WO <sub>4</sub> /SiC                               | 1023     | 4.0                            | 1.0                      | 8.0                 | 2.0                  | 55.0                 |                       |                       | 45.0                | 0.9                 |
| Catalysis Today 228 (2014) 5-14 | Na <sub>2</sub> WO <sub>4</sub> /Mn/SiC                            | 1023     | 4.0                            | 1.0                      | 14.0                | 4.0                  | 38.0                 |                       |                       | 62.0                | 2.5                 |
| Catalysis Today 228 (2014) 5-14 | MgO                                                                | 1023     | 4.0                            | 1.0                      | 56.0                | 8.0                  | 66.0                 |                       |                       | 34.0                | 2.7                 |
| Catalysis Today 228 (2014) 5-14 | WO <sub>3</sub> /MgO                                               | 1023     | 4.0                            | 1.0                      | 7.0                 | 1.0                  | 60.0                 |                       |                       | 40.0                | 0.4                 |
| Catalysis Today 228 (2014) 5-14 | Mn/MgO                                                             | 1023     | 4.0                            | 1.0                      | 100.0               | 15.0                 | 91.0                 |                       |                       | 9.0                 | 1.4                 |
| Catalysis Today 228 (2014) 5-14 | Na <sub>2</sub> WO <sub>4</sub> /MgO                               | 1023     | 4.0                            | 1.0                      | 5.0                 | 1.0                  | 56.0                 |                       |                       | 44.0                | 0.4                 |
| Catalysis Today 228 (2014) 5-14 | Na <sub>2</sub> WO <sub>4</sub> /Mn/MgO                            | 1023     | 4.0                            | 1.0                      | 26.0                | 4.0                  | 74.0                 |                       |                       | 26.0                | 1.0                 |
| Catalysis Today 228 (2014) 5-14 | Fe <sub>2</sub> O <sub>3</sub>                                     | 1023     | 4.0                            | 1.0                      | 28.0                | 2.0                  | 87.0                 |                       |                       | 13.0                | 0.3                 |
| Catalysis Today 228 (2014) 5-14 | WO <sub>3</sub> /Fe <sub>2</sub> O <sub>3</sub>                    | 1023     | 4.0                            | 1.0                      | 21.0                | 1.0                  | 45.0                 |                       |                       | 55.0                | 0.6                 |
| Catalysis Today 228 (2014) 5-14 | Mn/Fe <sub>2</sub> O <sub>3</sub>                                  | 1023     | 4.0                            | 1.0                      | 43.0                | 6.0                  | 81.0                 |                       |                       | 19.0                | 1.1                 |
| Catalysis Today 228 (2014) 5-14 | Na <sub>2</sub> WO <sub>4</sub> /Fe <sub>2</sub> O <sub>3</sub>    | 1023     | 4.0                            | 1.0                      | 6.0                 | 2.0                  | 23.0                 |                       |                       | 77.0                | 1.5                 |
| Catalysis Today 228 (2014) 5-14 | Na <sub>2</sub> WO <sub>4</sub> /Mn/Fe <sub>2</sub> O <sub>3</sub> | 1023     | 4.0                            | 1.0                      | 11.0                | 2.0                  | 27.5                 |                       |                       | 72.5                | 1.5                 |
| Catalysis Today 228 (2014) 5-14 | Fe <sub>3</sub> O <sub>4</sub>                                     | 1023     | 4.0                            | 1.0                      | 79.0                | 10.0                 | 96.0                 |                       |                       | 4.0                 | 0.4                 |
| Catalysis Today 228 (2014) 5-14 | WO <sub>3</sub> /Fe <sub>3</sub> O <sub>4</sub>                    | 1023     | 4.0                            | 1.0                      | 15.0                | 1.0                  | 57.0                 |                       |                       | 43.0                | 0.4                 |
| Catalysis Today 228 (2014) 5-14 | Mn/Fe <sub>3</sub> O <sub>4</sub>                                  | 1023     | 4.0                            | 1.0                      | 82.0                | 10.0                 | 94.0                 |                       |                       | 6.0                 | 0.6                 |
| Catalysis Today 228 (2014) 5-14 | Na <sub>2</sub> WO <sub>4</sub> /Fe <sub>3</sub> O <sub>4</sub>    | 1023     | 4.0                            | 1.0                      | 6.0                 | 1.0                  | 25.0                 |                       |                       | 75.0                | 0.8                 |
| Catalysis Today 228 (2014) 5-14 | Na <sub>2</sub> WO <sub>4</sub> /Mn/Fe <sub>3</sub> O <sub>4</sub> | 1023     | 4.0                            | 1.0                      | 8.0                 | 2.0                  | 37.0                 |                       |                       | 63.0                | 1.3                 |
| Catalysis Today 228 (2014) 5-14 | SrO                                                                | 1023     | 4.0                            | 1.0                      | 16.0                | 3.0                  | 67.0                 |                       |                       | 33.0                | 1.0                 |
| Catalysis Today 228 (2014) 5-14 | WO <sub>3</sub> /SrO                                               | 1023     | 4.0                            | 1.0                      | 14.0                | 4.0                  | 37.0                 |                       |                       | 63.0                | 2.5                 |
| Catalysis Today 228 (2014) 5-14 | Mn/SrO                                                             | 1023     | 4.0                            | 1.0                      | 31.0                | 6.0                  | 72.0                 |                       |                       | 28.0                | 1.7                 |
| Catalysis Today 228 (2014) 5-14 | Na <sub>2</sub> WO <sub>4</sub> /SrO                               | 1023     | 4.0                            | 1.0                      | 16.0                | 3.0                  | 64.0                 |                       |                       | 36.0                | 1.1                 |
| Catalysis Today 228 (2014) 5-14 | Na <sub>2</sub> WO <sub>4</sub> /Mn/SrO                            | 1023     | 4.0                            | 1.0                      | 30.0                | 5.0                  | 76.0                 |                       |                       | 24.0                | 1.2                 |
| Catalysis Today 228 (2014) 5-14 | TiO <sub>2</sub>                                                   | 1023     | 4.0                            | 1.0                      | 16.0                | 3.0                  | 71.0                 |                       |                       | 29.0                | 0.9                 |
| Catalysis Today 228 (2014) 5-14 | WO <sub>3</sub> /TiO <sub>2</sub>                                  | 1023     | 4.0                            | 1.0                      | 6.0                 | 1.0                  | 53.0                 |                       |                       | 47.0                | 0.5                 |
| Catalysis Today 228 (2014) 5-14 | Mn/TiO <sub>2</sub>                                                | 1023     | 4.0                            | 1.0                      | 41.0                | 6.0                  | 53.0                 |                       |                       | 47.0                | 2.8                 |
| Catalysis Today 228 (2014) 5-14 | Na <sub>2</sub> WO <sub>4</sub> /TiO <sub>2</sub>                  | 1023     | 4.0                            | 1.0                      | 5.0                 | 2.0                  | 19.0                 |                       |                       | 81.0                | 1.6                 |

**Table S1: Database with catalyst composition and their performance in OCM reaction under different conditions.**

| Reference                                    | Catalyst                                             | Temp., K | p(CH <sub>4</sub> )/p(O <sub>2</sub> ) | p <sub>total</sub> , bar | X(O <sub>2</sub> ), % | X(CH <sub>4</sub> ), % | S(CO <sub>x</sub> ), % | S(C <sub>2</sub> <sup>-</sup> ), % | S(C <sub>2</sub> -), % | S(C <sub>2</sub> ), % | Y(C <sub>2</sub> ), % |
|----------------------------------------------|------------------------------------------------------|----------|----------------------------------------|--------------------------|-----------------------|------------------------|------------------------|------------------------------------|------------------------|-----------------------|-----------------------|
| Catalysis Today 228 (2014) 5-14              | Na <sub>2</sub> WO <sub>4</sub> /Mn/TiO <sub>2</sub> | 1023     | 4.0                                    | 1.0                      | 12.0                  | 4.0                    | 21.0                   |                                    |                        | 79.0                  | 3.2                   |
| Catalysis Today 228 (2014) 5-14              | TiO <sub>2</sub>                                     | 1023     | 4.0                                    | 1.0                      | 20.0                  | 3.0                    | 79.0                   |                                    |                        | 21.0                  | 0.6                   |
| Catalysis Today 228 (2014) 5-14              | WO <sub>3</sub> /TiO <sub>2</sub>                    | 1023     | 4.0                                    | 1.0                      | 6.0                   | 1.0                    | 28.0                   |                                    |                        | 72.0                  | 0.7                   |
| Catalysis Today 228 (2014) 5-14              | Mn/TiO <sub>2</sub>                                  | 1023     | 4.0                                    | 1.0                      | 21.0                  | 4.0                    | 72.0                   |                                    |                        | 28.0                  | 1.1                   |
| Catalysis Today 228 (2014) 5-14              | Na <sub>2</sub> WO <sub>4</sub> /TiO <sub>2</sub>    | 1023     | 4.0                                    | 1.0                      | 6.0                   | 2.0                    | 26.0                   |                                    |                        | 74.0                  | 1.5                   |
| Catalysis Today 228 (2014) 5-14              | Na <sub>2</sub> WO <sub>4</sub> /Mn/TiO <sub>2</sub> | 1023     | 4.0                                    | 1.0                      | 8.0                   | 2.5                    | 36.0                   |                                    |                        | 64.0                  | 1.6                   |
| Catalysis Today 228 (2014) 5-14              | WO <sub>3</sub>                                      | 1023     | 4.0                                    | 1.0                      | 3.0                   | 1.0                    | 55.0                   |                                    |                        | 45.0                  | 0.5                   |
| Catalysis Today 228 (2014) 5-14              | Mn <sub>2</sub> O <sub>3</sub>                       | 1023     | 4.0                                    | 1.0                      | 77.0                  | 10.0                   | 85.0                   |                                    |                        | 15.0                  | 1.5                   |
| Catalysis Today 228 (2014) 5-14              | Na <sub>2</sub> WO <sub>4</sub>                      | 1023     | 4.0                                    | 1.0                      | 4.0                   | 2.0                    | 24.0                   |                                    |                        | 76.0                  | 1.5                   |
| Catalysis Today 228 (2014) 5-14              | Mn-Na <sub>2</sub> WO <sub>4</sub>                   | 1023     | 4.0                                    | 1.0                      | 8.0                   | 3.0                    | 23.0                   |                                    |                        | 77.0                  | 2.3                   |
| Catalysis Today 228 (2014) 212-218           | Mn/Na <sub>2</sub> WO <sub>4</sub> /SiO <sub>2</sub> | 973      | 19.0                                   | 3.0                      | 17.5                  |                        | 50.0                   |                                    |                        | 50.0                  |                       |
| Catalysis Today 228 (2014) 212-218           | Mn/Na <sub>2</sub> WO <sub>4</sub> /SiO <sub>2</sub> | 973      | 19.0                                   | 4.0                      | 19.0                  |                        | 50.0                   |                                    |                        | 50.0                  |                       |
| Catalysis Today 228 (2014) 212-218           | Mn/Na <sub>2</sub> WO <sub>4</sub> /SiO <sub>2</sub> | 973      | 19.0                                   | 5.0                      | 22.5                  |                        | 48.0                   |                                    |                        | 52.0                  |                       |
| Catalysis Today 228 (2014) 212-218           | Mn/Na <sub>2</sub> WO <sub>4</sub> /SiO <sub>2</sub> | 973      | 19.0                                   | 6.0                      | 26.0                  |                        | 48.0                   |                                    |                        | 52.0                  |                       |
| Catalysis Today 228 (2014) 212-218           | Mn/Na <sub>2</sub> WO <sub>4</sub> /SiO <sub>2</sub> | 973      | 19.0                                   | 7.0                      | 42.0                  |                        | 46.0                   |                                    |                        | 53.5                  |                       |
| Catalysis Today 228 (2014) 212-218           | Mn/Na <sub>2</sub> WO <sub>4</sub> /SiO <sub>2</sub> | 973      | 19.0                                   | 8.0                      | 47.5                  |                        | 46.0                   |                                    |                        | 53.0                  |                       |
| Catalysis Today 228 (2014) 212-218           | Mn/Na <sub>2</sub> WO <sub>4</sub> /SiO <sub>2</sub> | 973      | 19.0                                   | 9.0                      | 71.0                  |                        | 44.0                   |                                    |                        | 54.0                  |                       |
| Catalysis Today 228 (2014) 212-218           | Mn/Na <sub>2</sub> WO <sub>4</sub> /SiO <sub>2</sub> | 973      | 19.0                                   | 10.0                     | 83.0                  |                        | 40.0                   |                                    |                        | 55.0                  |                       |
| Catalysis Today 236 (2014) 12-22             | Mn/Na <sub>2</sub> WO <sub>4</sub> /SiO <sub>2</sub> | 1098     | 2.5                                    | 1.0                      |                       | 26.5                   | 27.8                   |                                    |                        | 72.2                  | 19.1                  |
| Catalysis Today 236 (2014) 12-22             | Mn/Na <sub>2</sub> WO <sub>4</sub> /SiO <sub>2</sub> | 1098     | 2.5                                    | 1.0                      |                       | 35.4                   | 41.9                   |                                    |                        | 58.1                  | 20.6                  |
| Catalysis Today 236 (2014) 12-22             | Mn/Na <sub>2</sub> WO <sub>4</sub> /SiO <sub>2</sub> | 1098     | 3.0                                    | 1.0                      |                       | 26.8                   | 40.4                   |                                    |                        | 59.6                  | 16.0                  |
| Chem Comm 50 (2014) 14440-14442              | Na-W-Mn/SiO <sub>2</sub>                             | 1023     | 4.0                                    | 1.0                      |                       | 14.0                   | 35.0                   |                                    |                        | 65.0                  | 9.1                   |
| Chem Comm 50 (2014) 14440-14442              | Na-W-Mn/SiO <sub>2</sub>                             | 1023     | 4.0                                    | 1.0                      |                       | 6.0                    | 41.0                   |                                    |                        | 59.0                  | 3.5                   |
| Chem Comm 50 (2014) 14440-14442              | Na-W-Mn/SiO <sub>2</sub>                             | 1023     | 4.0                                    | 1.0                      |                       | 2.0                    | 47.5                   |                                    |                        | 52.5                  | 1.1                   |
| Chemie Ingenieur Technik 86 (2014) 1894-1900 | Na-W-Mn/SiO <sub>2</sub>                             | 1123     | 4.0                                    | 1.0                      |                       | 32.0                   | 32.0                   |                                    |                        | 68.0                  | 21.8                  |
| Chemie Ingenieur Technik 86 (2014) 1894-1900 | Na-W-Mn/SiO <sub>2</sub>                             | 1123     | 2.0                                    | 1.0                      |                       | 48.0                   | 48.0                   |                                    |                        | 52.0                  | 25.0                  |
| Chemie Ingenieur Technik 86 (2014) 1894-1900 | Na-W-Mn/SiO <sub>2</sub>                             | 1123     | 1.0                                    | 1.0                      |                       | 72.0                   | 78.0                   |                                    |                        | 22.0                  | 15.8                  |
| ChemCatChem 6 (2014) 1245-1251               | Na <sub>2</sub> WO <sub>4</sub> /SiO <sub>2</sub>    | 1153     | 3.0                                    | 1.0                      |                       | 36.9                   | 31.7                   | 48.0                               | 15.8                   | 63.8                  | 23.5                  |
| ChemCatChem 6 (2014) 2815-2820               | Ce-LaO <sub>3</sub>                                  | 1288     | 4.0                                    | 1.0                      |                       | 30.0                   | 45.0                   |                                    |                        | 55.0                  | 16.5                  |
| Dalton Trans. 43 (2014) 8690-8697            | NH <sub>4</sub> -La-ptda                             | 873      | 2.8                                    | 1.0                      |                       | 13.0                   | 72.0                   |                                    |                        | 28.0                  | 3.6                   |
| Dalton Trans. 43 (2014) 8690-8697            | NH <sub>4</sub> -La-ptda                             | 923      | 2.8                                    | 1.0                      |                       | 17.0                   | 57.5                   |                                    |                        | 42.5                  | 7.2                   |
| Dalton Trans. 43 (2014) 8690-8697            | NH <sub>4</sub> -La-ptda                             | 973      | 2.8                                    | 1.0                      |                       | 23.0                   | 54.0                   |                                    |                        | 46.0                  | 10.6                  |
| Dalton Trans. 43 (2014) 8690-8697            | NH <sub>4</sub> -La-ptda                             | 1023     | 2.8                                    | 1.0                      |                       | 29.0                   | 53.5                   |                                    |                        | 46.5                  | 13.5                  |
| Dalton Trans. 43 (2014) 8690-8697            | NH <sub>4</sub> -La-ptda                             | 1073     | 2.8                                    | 1.0                      |                       | 30.0                   | 54.5                   |                                    |                        | 45.5                  | 13.7                  |
| Dalton Trans. 43 (2014) 8690-8697            | Sr-La-ptda                                           | 823      | 2.8                                    | 1.0                      |                       | 12.0                   | 76.0                   |                                    |                        | 24.0                  | 2.9                   |
| Dalton Trans. 43 (2014) 8690-8697            | Sr-La-ptda                                           | 873      | 2.8                                    | 1.0                      |                       | 26.0                   | 53.0                   |                                    |                        | 47.0                  | 12.2                  |
| Dalton Trans. 43 (2014) 8690-8697            | Sr-La-ptda                                           | 923      | 2.8                                    | 1.0                      |                       | 29.5                   | 54.0                   |                                    |                        | 46.0                  | 13.6                  |
| Dalton Trans. 43 (2014) 8690-8697            | Sr-La-ptda                                           | 973      | 2.8                                    | 1.0                      |                       | 29.0                   | 50.0                   |                                    |                        | 50.0                  | 14.5                  |
| Dalton Trans. 43 (2014) 8690-8697            | Sr-La-ptda                                           | 1023     | 2.8                                    | 1.0                      |                       | 29.5                   | 48.5                   |                                    |                        | 51.5                  | 15.2                  |
| Dalton Trans. 43 (2014) 8690-8697            | Sr-La-ptda                                           | 1073     | 2.8                                    | 1.0                      |                       | 31.0                   | 49.0                   |                                    |                        | 51.0                  | 15.8                  |
| Doklady Phys Chem 455 (2014) 60-63           | Li-W-Mn-SiO <sub>2</sub>                             | 1175     | 1.5                                    | 1.0                      | 35.0                  | 34.0                   | 46.0                   | 33.0                               | 18.0                   | 54.0                  | 18.4                  |
| Doklady Phys Chem 455 (2014) 60-63           | Li-W-Mn-SiO <sub>2</sub>                             | 1015     | 2.1                                    | 1.0                      | 3.0                   | 1.0                    | 20.0                   | 16.0                               | 64.0                   | 80.0                  | 0.8                   |
| Doklady Phys Chem 455 (2014) 60-63           | Li-W-Mn-SiO <sub>2</sub>                             | 1074     | 2.0                                    | 1.0                      | 17.0                  | 11.0                   | 18.0                   | 30.0                               | 50.0                   | 82.0                  | 9.0                   |

**Table S1: Database with catalyst composition and their performance in OCM reaction under different conditions.**

| Reference                                | Catalyst       | Temp., K | $p(\text{CH}_4)/p(\text{O}_2)$ | $p_{\text{total}}$ , bar | $X(\text{O}_2)$ , % | $X(\text{CH}_4)$ , % | $S(\text{CO}_x)$ , % | $S(\text{C}_2^-)$ , % | $S(\text{C}_2^-)$ , % | $S(\text{C}_2)$ , % | $Y(\text{C}_2)$ , % |
|------------------------------------------|----------------|----------|--------------------------------|--------------------------|---------------------|----------------------|----------------------|-----------------------|-----------------------|---------------------|---------------------|
| Doklady Phys Chem 455 (2014) 60-63       | Li-W-Mn-SiO2   | 1127     | 2.1                            | 1.0                      | 92.0                | 45.0                 | 47.0                 | 36.0                  | 12.0                  | 53.0                | 23.9                |
| Doklady Phys Chem 455 (2014) 60-63       | Li-W-Mn-SiO2   | 1158     | 2.2                            | 1.0                      | 94.0                | 46.0                 | 49.0                 | 36.0                  | 10.0                  | 51.0                | 23.5                |
| Doklady Phys Chem 455 (2014) 60-63       | Li-W-Mn-SiO2   | 1170     | 2.1                            | 1.0                      | 97.0                | 45.0                 | 54.0                 | 33.0                  | 9.0                   | 46.0                | 20.7                |
| Doklady Phys Chem 455 (2014) 60-63       | Li-W-Mn-SiO2   | 1205     | 2.3                            | 1.0                      | 98.0                | 44.0                 | 55.0                 | 32.0                  | 8.0                   | 45.0                | 19.8                |
| Doklady Phys Chem 455 (2014) 60-63       | Li-W-Mn-SiO2   | 1019     | 2.0                            | 1.0                      | 0.0                 | 0.0                  | 0.0                  | 0.0                   | 0.0                   | 0.0                 | 0.0                 |
| Doklady Phys Chem 455 (2014) 60-63       | Li-W-Mn-SiO2   | 1044     | 2.0                            | 1.0                      | 9.0                 | 3.0                  | 50.0                 | 20.0                  | 30.0                  | 50.0                | 1.5                 |
| Doklady Phys Chem 455 (2014) 60-63       | Li-W-Mn-SiO2   | 1078     | 2.0                            | 1.0                      | 17.0                | 8.0                  | 16.0                 | 30.0                  | 46.0                  | 84.0                | 6.7                 |
| Doklady Phys Chem 455 (2014) 60-63       | Li-W-Mn-SiO2   | 1178     | 2.0                            | 1.0                      | 85.0                | 38.0                 | 35.0                 | 43.0                  | 16.0                  | 65.0                | 24.7                |
| Doklady Phys Chem 455 (2014) 60-63       | Na-W-Mn-SiO2   | 1004     | 1.9                            | 1.0                      | 12.0                | 4.0                  | 36.0                 | 7.0                   | 43.0                  | 64.0                | 2.6                 |
| Doklady Phys Chem 455 (2014) 60-63       | Na-W-Mn-SiO2   | 1056     | 1.8                            | 1.0                      | 33.0                | 16.0                 | 35.0                 | 28.0                  | 34.0                  | 65.0                | 10.4                |
| Doklady Phys Chem 455 (2014) 60-63       | Na-W-Mn-SiO2   | 1153     | 1.9                            | 1.0                      | 99.0                | 46.0                 | 52.0                 | 33.0                  | 10.0                  | 48.0                | 22.1                |
| Doklady Phys Chem 455 (2014) 60-63       | Na-W-Mn-SiO2   | 1175     | 1.8                            | 1.0                      | 99.0                | 46.0                 | 54.0                 | 32.0                  | 9.0                   | 46.0                | 21.2                |
| Doklady Phys Chem 455 (2014) 60-63       | Na-W-Mn-SiO2   | 1121     | 2.2                            | 1.0                      | 84.0                | 30.0                 | 47.0                 | 33.0                  | 17.0                  | 53.0                | 15.9                |
| Doklady Phys Chem 455 (2014) 60-63       | Na-W-Mn-SiO2   | 1152     | 2.2                            | 1.0                      | 93.0                | 35.0                 | 43.0                 | 37.0                  | 15.0                  | 57.0                | 20.0                |
| Doklady Phys Chem 455 (2014) 60-63       | Na-W-Mn-SiO2   | 1185     | 2.4                            | 1.0                      | 97.0                | 36.0                 | 41.0                 | 40.0                  | 13.0                  | 60.0                | 21.6                |
| Energy Fuels 28 (2014) 877-890           | Na2WO4/Mn/SiO2 | 1098     | 2.5                            |                          |                     | 28.0                 | 30.0                 |                       |                       | 70.0                | 19.6                |
| Energy Fuels 28 (2014) 877-890           | Na2WO4/Mn/SiO2 | 1098     | 3.0                            |                          |                     | 27.0                 | 24.0                 |                       |                       | 76.0                | 20.5                |
| Energy Fuels 28 (2014) 877-890           | Na2WO4/Mn/SiO2 | 1098     | 4.0                            |                          |                     | 22.0                 | 22.0                 |                       |                       | 78.0                | 17.2                |
| Energy Fuels 28 (2014) 877-890           | Na2WO4/Mn/SiO2 | 1098     | 5.0                            |                          |                     | 20.0                 | 19.0                 |                       |                       | 81.0                | 16.2                |
| J Ind and Eng Chem 20 (2014) 1993-2002   | Na2WO4/Mn/SiO2 | 1273     | 2.0                            | 6.0                      |                     | 29.0                 | 28.9                 |                       |                       | 71.1                | 20.6                |
| J Ind and Eng Chem 20 (2014) 1993-2002   | Na2WO4/Mn/SiO2 | 1273     | 2.2                            | 6.0                      |                     | 28.3                 | 26.0                 |                       |                       | 74.0                | 20.9                |
| J Ind and Eng Chem 20 (2014) 1993-2002   | Na2WO4/Mn/SiO2 | 1273     | 2.4                            | 6.0                      |                     | 27.5                 | 24.4                 |                       |                       | 75.6                | 20.8                |
| J Ind and Eng Chem 20 (2014) 1993-2002   | Na2WO4/Mn/SiO2 | 1273     | 2.5                            | 6.0                      |                     | 27.0                 | 23.2                 |                       |                       | 76.8                | 20.7                |
| J Ind and Eng Chem 20 (2014) 1993-2002   | Na2WO4/Mn/SiO2 | 1273     | 3.0                            | 6.0                      |                     | 24.6                 | 19.4                 |                       |                       | 80.6                | 19.8                |
| J Ind and Eng Chem 20 (2014) 1993-2002   | Na2WO4/Mn/SiO2 | 1273     | 4.0                            | 6.0                      |                     | 19.8                 | 15.7                 |                       |                       | 84.3                | 16.7                |
| J Ind and Eng Chem 20 (2014) 1993-2002   | Na2WO4/Mn/SiO2 | 1273     | 5.0                            | 6.0                      |                     | 15.9                 | 13.8                 |                       |                       | 86.2                | 13.7                |
| J Mol Liquids 191 (2014) 100-106         | KCl-LaCl3      | 1023     | 0.5                            | 1.0                      |                     | 6.0                  | 26.0                 |                       |                       | 74.0                | 4.4                 |
| J Mol Liquids 191 (2014) 100-106         | KCl-CeCl3      | 1023     | 0.5                            | 1.0                      |                     | 12.5                 | 59.0                 |                       |                       | 41.0                | 5.1                 |
| J Mol Liquids 191 (2014) 100-106         | KCl-SmCl3      | 1023     | 0.5                            | 1.0                      |                     | 21.0                 | 30.0                 |                       |                       | 70.0                | 14.7                |
| J Mol Liquids 191 (2014) 100-106         | KCl-DyCl3      | 1023     | 0.5                            | 1.0                      |                     | 34.0                 | 45.0                 |                       |                       | 55.0                | 18.7                |
| J Mol Liquids 191 (2014) 100-106         | KCl-YbCl3      | 1023     | 0.5                            | 1.0                      |                     | 25.0                 | 39.0                 |                       |                       | 61.0                | 15.3                |
| J Nat Gas Sci Eng 20 (2014) 347-356      | Li/MgO         | 1073     | 2.0                            | 1.0                      |                     | 46.0                 | 51.9                 |                       |                       | 46.0                | 21.2                |
| J Nat Gas Sci Eng 18 (2014) 406-411      | La2O3-CeO2     | 843      | 5.0                            | 1.0                      | 97.0                | 25.0                 | 42.0                 |                       |                       | 58.0                | 14.5                |
| Kinetics and Catalysis 55 (2014) 361-371 | La-SiO2        | 973      | 3.8                            | 1.0                      | 22.3                | 4.0                  | 98.1                 | 0.1                   | 1.8                   | 1.9                 | 0.1                 |
| Kinetics and Catalysis 55 (2014) 361-371 | La-SiO2        | 1023     | 3.8                            | 1.0                      | 33.0                | 6.2                  | 95.4                 | 0.7                   | 3.9                   | 4.6                 | 0.3                 |
| Kinetics and Catalysis 55 (2014) 361-371 | La-SiO2        | 1073     | 3.8                            | 1.0                      | 45.4                | 8.9                  | 90.0                 | 3.4                   | 6.6                   | 10.0                | 0.9                 |
| Kinetics and Catalysis 55 (2014) 361-371 | Al-La-SiO2     | 973      | 3.8                            | 1.0                      | 21.8                | 4.3                  | 97.8                 | 0.1                   | 2.1                   | 2.2                 | 0.1                 |
| Kinetics and Catalysis 55 (2014) 361-371 | Al-La-SiO2     | 1023     | 3.8                            | 1.0                      | 32.5                | 6.5                  | 94.9                 | 0.8                   | 4.3                   | 5.1                 | 0.3                 |
| Kinetics and Catalysis 55 (2014) 361-371 | Al-La-SiO2     | 1073     | 3.8                            | 1.0                      | 45.0                | 9.3                  | 88.6                 | 4.2                   | 7.2                   | 11.4                | 1.1                 |
| Kinetics and Catalysis 55 (2014) 361-371 | Al-La-SiO2     | 973      | 3.8                            | 1.0                      | 44.0                | 8.2                  | 89.1                 | 1.4                   | 9.5                   | 10.9                | 0.9                 |
| Kinetics and Catalysis 55 (2014) 361-371 | Al-La-SiO2     | 1023     | 3.8                            | 1.0                      | 69.9                | 13.4                 | 84.8                 | 4.0                   | 11.2                  | 15.2                | 2.0                 |
| Kinetics and Catalysis 55 (2014) 361-371 | Al-La-SiO2     | 1073     | 3.8                            | 1.0                      | 84.5                | 16.7                 | 82.1                 | 6.8                   | 11.1                  | 17.9                | 3.0                 |
| Kinetics and Catalysis 55 (2014) 361-371 | Al-La-SiO2     | 973      | 3.8                            | 1.0                      | 35.0                | 7.4                  | 95.5                 | 0.5                   | 4.0                   | 4.5                 | 0.3                 |



**Table S1: Database with catalyst composition and their performance in OCM reaction under different conditions.**

| Reference                                | Catalyst              | Temp., K | $p(\text{CH}_4)/p(\text{O}_2)$ | $p_{\text{total}}$ , bar | $X(\text{O}_2)$ , % | $X(\text{CH}_4)$ , % | $S(\text{CO}_x)$ , % | $S(\text{C}_2^-)$ , % | $S(\text{C}_2^-)$ , % | $S(\text{C}_2)$ , % | $Y(\text{C}_2)$ , % |
|------------------------------------------|-----------------------|----------|--------------------------------|--------------------------|---------------------|----------------------|----------------------|-----------------------|-----------------------|---------------------|---------------------|
| Kinetics and Catalysis 55 (2014) 361-371 | Al-La-SiO2            | 1023     | 3.8                            | 1.0                      | 53.9                | 11.2                 | 90.9                 | 2.1                   | 7.0                   | 9.1                 | 1.0                 |
| Kinetics and Catalysis 55 (2014) 361-371 | Al-La-SiO2            | 1073     | 3.8                            | 1.0                      | 71.2                | 14.6                 | 86.0                 | 4.9                   | 9.1                   | 14.0                | 2.0                 |
| Kinetics and Catalysis 55 (2014) 361-371 | Al-La-SiO2            | 973      | 3.8                            | 1.0                      | 35.4                | 6.8                  | 97.4                 | 0.2                   | 2.4                   | 2.6                 | 0.2                 |
| Kinetics and Catalysis 55 (2014) 361-371 | Al-La-SiO2            | 1023     | 3.8                            | 1.0                      | 60.5                | 11.5                 | 94.9                 | 1.1                   | 4.0                   | 5.1                 | 0.6                 |
| Kinetics and Catalysis 55 (2014) 361-371 | Al-La-SiO2            | 1073     | 3.8                            | 1.0                      | 78.3                | 14.7                 | 91.0                 | 3.1                   | 5.9                   | 9.0                 | 1.3                 |
| Reac Kinet Mech Cat 112 (2014) 227-240   | Li/MgO                | 973      | 2.0                            | 1.0                      |                     | 37.0                 | 66.3                 |                       |                       | 33.7                | 12.5                |
| Reac Kinet Mech Cat 112 (2014) 227-240   | Li/MgO                | 998      | 2.0                            | 1.0                      |                     | 38.7                 | 66.7                 |                       |                       | 33.3                | 12.9                |
| Reac Kinet Mech Cat 112 (2014) 227-240   | Li/MgO                | 1023     | 2.0                            | 1.0                      |                     | 41.3                 | 63.8                 |                       |                       | 36.2                | 14.9                |
| Reac Kinet Mech Cat 112 (2014) 227-240   | Li/MgO                | 1048     | 2.0                            | 1.0                      |                     | 39.0                 | 59.1                 |                       |                       | 40.9                | 16.0                |
| Reac Kinet Mech Cat 112 (2014) 227-240   | Li/MgO                | 1073     | 2.0                            | 1.0                      |                     | 38.1                 | 64.8                 |                       |                       | 35.2                | 13.4                |
| Reac Kinet Mech Cat 112 (2014) 227-240   | Li/MgO                | 1098     | 2.0                            | 1.0                      |                     | 40.9                 | 80.1                 |                       |                       | 19.9                | 8.1                 |
| Reac Kinet Mech Cat 112 (2014) 227-240   | Li/MgO                | 1123     | 2.0                            | 1.0                      |                     | 46.0                 | 88.8                 |                       |                       | 11.2                | 5.2                 |
| Reac Kinet Mech Cat 112 (2014) 227-240   | Ca-ZnO                | 948      | 2.0                            | 1.0                      |                     | 11.1                 | 92.5                 |                       |                       | 7.5                 | 0.8                 |
| Reac Kinet Mech Cat 112 (2014) 227-240   | Ca-ZnO                | 973      | 2.0                            | 1.0                      |                     | 17.1                 | 87.8                 |                       |                       | 12.2                | 2.1                 |
| Reac Kinet Mech Cat 112 (2014) 227-240   | Ca-ZnO                | 998      | 2.0                            | 1.0                      |                     | 23.7                 | 87.0                 |                       |                       | 13.0                | 3.1                 |
| Reac Kinet Mech Cat 112 (2014) 227-240   | Ca-ZnO                | 1023     | 2.0                            | 1.0                      |                     | 35.4                 | 75.7                 |                       |                       | 24.3                | 8.6                 |
| Reac Kinet Mech Cat 112 (2014) 227-240   | Ca-ZnO                | 1048     | 2.0                            | 1.0                      |                     | 36.2                 | 71.9                 |                       |                       | 28.1                | 10.2                |
| Reac Kinet Mech Cat 112 (2014) 227-240   | Ca-ZnO                | 1073     | 2.0                            | 1.0                      |                     | 36.5                 | 70.5                 |                       |                       | 29.6                | 10.8                |
| Reac Kinet Mech Cat 112 (2014) 227-240   | Ca-ZnO                | 1098     | 2.0                            | 1.0                      |                     | 42.8                 | 84.5                 |                       |                       | 15.5                | 6.6                 |
| Patent 26.03.2014: CN 103657640 A        | Na-W-Mn-Ba-Ti/SiO2    | 1023     | 4.0                            | 1.0                      |                     | 30.6                 | 28.7                 |                       |                       | 71.3                | 21.8                |
| Patent 26.03.2014: CN 103657640 A        | Na-W-Mn-Ba-Ti/SiO2    | 1073     | 4.0                            | 1.0                      |                     | 31.8                 | 27.3                 |                       |                       | 72.7                | 23.1                |
| Patent 26.03.2014: CN 103657640 A        | K-W-Mn-Ba-Ti/SiO2     | 1093     | 5.0                            | 1.0                      |                     | 32.0                 | 27.7                 |                       |                       | 72.3                | 23.1                |
| Patent 26.03.2014: CN 103657640 A        | Na-W-Mn-Ba-Ti/SiO2    | 1073     | 4.0                            | 1.0                      |                     | 30.0                 | 28.8                 |                       |                       | 71.2                | 21.4                |
| Patent 26.03.2014: CN 103657640 A        | Na-W-Mn-Ba-Ti/Ce-SiO2 | 1033     | 4.0                            | 1.0                      |                     | 32.5                 | 26.6                 |                       |                       | 73.4                | 23.9                |
| Patent 26.03.2014: CN 103657640 A        | Na-W-Mn-Ba-Ti/Ce-SiO2 | 1033     | 4.0                            | 1.0                      |                     | 32.0                 | 27.5                 |                       |                       | 72.5                | 23.2                |
| Patent 26.03.2014: CN 103657640 A        | Na-W-Mn-Ba-Ti/La-SiO2 | 993      | 3.0                            | 1.0                      |                     | 33.0                 | 39.9                 |                       |                       | 60.1                | 19.8                |
| Patent 26.03.2014: CN 103657640 A        | Na-W-Mn-Ba-Ti/Sr-SiO2 | 993      | 3.0                            | 1.0                      |                     | 33.2                 | 37.7                 |                       |                       | 62.3                | 20.7                |
| Patent 26.03.2014: CN 103657640 A        | Na-W-Mn-Ba-Ti/Ru-SiO2 | 993      | 3.0                            | 1.0                      |                     | 32.5                 | 33.5                 |                       |                       | 66.5                | 21.6                |
| Patent 26.03.2014: CN 103657640 A        | Na-W-Mn-Ba-Ti/Rb-SiO2 | 993      | 3.0                            | 1.0                      |                     | 31.9                 | 41.1                 |                       |                       | 58.9                | 18.8                |
| Patent 26.03.2014: CN 103657640 A        | Na-W-Mn-Ba-Ti/Zr-SiO2 | 993      | 3.0                            | 1.0                      |                     | 31.5                 | 39.8                 |                       |                       | 60.2                | 19.0                |
| Patent 26.03.2014: CN 103657640 A        | Na-W-Mn-Ba-Ti/Nd-SiO2 | 993      | 3.0                            | 1.0                      |                     | 32.3                 | 38.8                 |                       |                       | 61.2                | 19.8                |
| Patent 26.03.2014: CN 103657640 A        | Na-W-Mn-Ba-Ti/SiO2    | 1073     | 4.0                            | 1.0                      |                     | 29.4                 | 32.5                 |                       |                       | 67.5                | 19.8                |
| J. Mem. Sci. 468. 2014. 31-41            | BiYSm/LSCF            | 973      |                                | 1.0                      |                     | 4.0                  | 98.0                 |                       |                       | 2.0                 | 0.1                 |
| J. Mem. Sci. 468. 2014. 31-41            | BiYSm/LSCF            | 1023     |                                | 1.0                      |                     | 5.0                  | 80.0                 |                       |                       | 20.0                | 1.0                 |
| J. Mem. Sci. 468. 2014. 31-41            | BiYSm/LSCF            | 1073     |                                | 1.0                      |                     | 8.0                  | 59.0                 |                       |                       | 41.0                | 3.3                 |
| J. Mem. Sci. 468. 2014. 31-41            | BiYSm/LSCF            | 1123     |                                | 1.0                      |                     | 18.0                 | 50.0                 |                       |                       | 50.0                | 9.0                 |
| J. Mem. Sci. 468. 2014. 31-41            | BiYSm/LSCF            | 1173     |                                | 1.0                      |                     | 34.0                 | 57.0                 |                       |                       | 43.0                | 14.6                |
| J. Mem. Sci. 468. 2014. 31-41            | BiYSm/LSCF            | 973      |                                | 1.0                      |                     | 7.5                  | 83.0                 |                       |                       | 17.0                | 1.3                 |
| J. Mem. Sci. 468. 2014. 31-41            | BiYSm/LSCF            | 1023     |                                | 1.0                      |                     | 9.0                  | 79.0                 |                       |                       | 21.0                | 1.9                 |
| J. Mem. Sci. 468. 2014. 31-41            | BiYSm/LSCF            | 1073     |                                | 1.0                      |                     | 14.0                 | 73.0                 |                       |                       | 27.0                | 3.8                 |
| J. Mem. Sci. 468. 2014. 31-41            | BiYSm/LSCF            | 1123     |                                | 1.0                      |                     | 19.0                 | 48.0                 |                       |                       | 52.0                | 9.9                 |
| J. Mem. Sci. 468. 2014. 31-41            | BiYSm/LSCF            | 1173     |                                | 1.0                      |                     | 32.5                 | 60.0                 |                       |                       | 40.0                | 13.0                |
| J. Mem. Sci. 468. 2014. 31-41            | BiYSm/LSCF            | 973      |                                | 1.0                      |                     | 5.0                  | 77.0                 |                       |                       | 23.0                | 1.2                 |

**Table S1: Database with catalyst composition and their performance in OCM reaction under different conditions.**

| Reference                                      | Catalyst                  | Temp., K | $p(\text{CH}_4)/p(\text{O}_2)$ | $p_{\text{total}}$ , bar | $X(\text{O}_2)$ , % | $X(\text{CH}_4)$ , % | $S(\text{CO}_x)$ , % | $S(\text{C}_2^-)$ , % | $S(\text{C}_2^-)$ , % | $S(\text{C}_2)$ , % | $Y(\text{C}_2)$ , % |
|------------------------------------------------|---------------------------|----------|--------------------------------|--------------------------|---------------------|----------------------|----------------------|-----------------------|-----------------------|---------------------|---------------------|
| J. Mem. Sci. 468. 2014. 31-41                  | BiYSm/LSCF                | 1023     |                                | 1.0                      |                     | 5.5                  | 75.0                 |                       |                       | 25.0                | 1.4                 |
| J. Mem. Sci. 468. 2014. 31-41                  | BiYSm/LSCF                | 1073     |                                | 1.0                      |                     | 7.5                  | 42.0                 |                       |                       | 58.0                | 4.4                 |
| J. Mem. Sci. 468. 2014. 31-41                  | BiYSm/LSCF                | 1123     |                                | 1.0                      |                     | 16.0                 | 20.0                 |                       |                       | 80.0                | 12.8                |
| J. Mem. Sci. 468. 2014. 31-41                  | BiYSm/LSCF                | 1173     |                                | 1.0                      |                     | 22.0                 | 32.0                 |                       |                       | 68.0                | 15.0                |
| ACS Catal. 5 (2015) 1663                       | LaCO3                     | 713      | 3.0                            | 1.0                      | 97.2                | 30.0                 | 51.0                 |                       |                       | 49.0                | 14.7                |
| ACS Catal. 5 (2015) 1663                       | LaCO3                     | 713      | 3.0                            | 1.0                      | 0.8                 | 0.3                  | 100.0                |                       |                       | 0.0                 | 0.0                 |
| Appl Catal A 497(2015) 96-106                  | Mn-Na2WO4/n-SiO2          | 1073     | 4.0                            | 1.0                      |                     | 25.2                 | 27.8                 | 44.9                  | 27.0                  | 73.3                | 18.5                |
| Appl Catal A 497(2015) 96-106                  | Na2WO4/n-SiO2             | 1073     | 4.0                            | 1.0                      |                     | 4.2                  | 31.8                 | 21.8                  | 46.4                  | 69.0                | 2.9                 |
| Appl Catal A 497(2015) 96-106                  | Mn/n-SiO2                 | 1073     | 4.0                            | 1.0                      |                     | 3.9                  | 86.0                 | 3.1                   | 10.9                  | 14.1                | 0.5                 |
| Appl Catal A 497(2015) 96-106                  | Mn-Na2WO4/n-MgO           | 1073     | 4.0                            | 1.0                      |                     | 5.0                  | 35.2                 | 17.9                  | 46.9                  | 64.9                | 3.2                 |
| Appl Catal A 504. 2015. 509-518                | La-Sr/CaO                 | 1023     | 4.0                            | 1.0                      |                     | 10.0                 | 60.0                 |                       |                       | 40.0                |                     |
| Appl Catal A 504. 2015. 509-518                | Na-W-Mn/SiO2              | 1023     | 4.0                            | 1.0                      |                     | 10.0                 |                      |                       |                       | 60-65               |                     |
| Appl Catal A 504. 2015. 509-518                | Na-W-Mn/SiO2              | 1023     | 4.0                            | 1.0                      |                     | 10.0                 |                      |                       |                       | 60-65               |                     |
| Appl Catal A 504. 2015. 509-518                | Na-W-Mn/SiO2              | 1023     | 4.0                            | 1.0                      |                     | 10.0                 |                      |                       |                       | 60-65               |                     |
| Appl Catal A 504. 2015. 509-518                | Na-W-Mn/SiC               | 1023     | 4.0                            | 1.0                      |                     | 10.0                 |                      |                       |                       | 60-65               |                     |
| Appl Catal A 504. 2015. 509-518                | Na-W-Mn/SiC               | 1023     | 4.0                            | 1.0                      |                     | 10.0                 |                      |                       |                       | 60-65               |                     |
| Appl Catal A 504. 2015. 509-518                | Na-W-Mn/Al2O3             | 1023     | 4.0                            | 1.0                      |                     | 10.0                 |                      |                       |                       | 6.0                 |                     |
| Appl Catal A 504. 2015. 509-518                | Na-W-Mn/Al2O3             | 1023     | 4.0                            | 1.0                      |                     | 10.0                 |                      |                       |                       | 60-65               |                     |
| Catal Lett 145 (2015) 1251-1261                | Sm2O3                     | 1073     | 4.0                            | 1.0                      | 100.0               | 17.7                 | 51.5                 | 36.1                  | 12.4                  | 48.5                | 8.6                 |
| Catal Lett 145 (2015) 1251-1261                | Sm2O3/p-Al2O3             | 1073     | 4.0                            | 1.0                      | 100.0               | 17.0                 | 64.3                 | 25.9                  | 9.8                   | 35.7                | 6.1                 |
| Catal Lett 145 (2015) 1251-1261                | Sm2O3/Al2O3               | 1073     | 4.0                            | 1.0                      | 100.0               | 13.7                 | 70.7                 | 22.1                  | 7.2                   | 29.3                | 4.0                 |
| Catal Lett 145 (2015) 1251-1261                | Al2O3 Aerogel - NO3       | 1073     | 4.0                            | 1.0                      | 100.0               | 11.6                 | 89.7                 | 2.3                   | 8.0                   | 10.3                | 1.2                 |
| Catal Lett 145 (2015) 1251-1261                | Al2O3 Aerogel - Cl        | 1073     | 4.0                            | 1.0                      | 100.0               | 12.8                 | 77.6                 | 15.0                  | 7.4                   | 22.4                | 2.9                 |
| Catal Lett 145 (2015) 1251-1261                | Al2O3 Xerogel - NO3       | 1073     | 4.0                            | 1.0                      | 100.0               | 14.1                 | 81.2                 | 13.6                  | 5.2                   | 18.8                | 2.7                 |
| Catal Lett 145 (2015) 1251-1261                | Al2O3 Xerogel - Cl        | 1073     | 4.0                            | 1.0                      | 100.0               | 13.3                 | 80.8                 | 13.2                  | 6.0                   | 19.2                | 2.6                 |
| Catal Lett 145 (2015) 1251-1261                | Sm2O3/Al2O3 Aerogel - NO3 | 1073     | 4.0                            | 1.0                      | 100.0               | 14.3                 | 76.7                 | 25.7                  | -2.4                  | 23.3                | 3.3                 |
| Catal Lett 145 (2015) 1251-1261                | Sm2O3/Al2O3 Aerogel - Cl  | 1073     | 4.0                            | 1.0                      | 100.0               | 13.8                 | 68.4                 | 23.5                  | 8.1                   | 31.6                | 4.4                 |
| Catal Lett 145 (2015) 1251-1261                | Sm2O3/Al2O3 Xerogel - NO3 | 1073     | 4.0                            | 1.0                      | 100.0               | 12.6                 | 73.5                 | 18.8                  | 7.7                   | 26.5                | 3.3                 |
| Catal Lett 145 (2015) 1251-1261                | Sm2O3/Al2O3 Xerogel - Cl  | 1073     | 4.0                            | 1.0                      | 100.0               | 19.3                 | 57.1                 | 32.1                  | 10.8                  | 42.9                | 8.3                 |
| Chem. Eng. J. 281, 2015, 678-687               | Na2WO4/Mn/SiO2            | 1103     | 2.0                            | 1.0                      |                     | 47.0                 | 50.0                 |                       |                       | 41.0                | 19.3                |
| Chem. Eng. J. 281, 2015, 678-687               | Na2WO4/Mn/SiO2            | 1103     | 2.0                            | 1.0                      |                     | 49.0                 | 46.0                 |                       |                       | 48.0                | 23.5                |
| Chem. Eng. Technol. 38, 2015, No.12, 2243-2252 | La/MgO                    | 1223     | 7.0                            | 1.0                      | 98.9                | 28.0                 | 50.0                 |                       |                       | 45.2                | 12.7                |
| Chem. Eng. Technol. 38, 2015, No.12, 2243-2252 | La/MgO                    | 1233     | 7.0                            | 1.0                      | 98.6                | 27.8                 | 41.1                 |                       |                       | 54.0                | 15.0                |
| Chem. Eng. Technol. 38, 2015, No.12, 2243-2252 | La/MgO                    | 1248     | 7.0                            | 1.0                      | 96.2                | 24.1                 | 37.0                 |                       |                       | 59.6                | 14.4                |
| Chem. Eng. Technol. 38, 2015, No.12, 2243-2252 | La/MgO                    | 1293     | 7.0                            | 1.0                      | 94.0                | 21.4                 | 30.5                 |                       |                       | 63.0                | 13.5                |
| Chem. Eng. Technol. 38, 2015, No.12, 2243-2252 | La/MgO                    | 1293     | 7.0                            | 1.0                      | 91.6                | 20.4                 | 27.8                 |                       |                       | 66.5                | 13.6                |
| Chem. Eng. Technol. 38, 2015, No.12, 2243-2252 | La/MgO                    | 1298     | 7.0                            | 1.0                      | 89.1                | 19.3                 | 25.7                 |                       |                       | 69.5                | 13.4                |
| Chem. Eng. Technol. 38, 2015, No.12, 2243-2252 | La/MgO                    | 1183     | 7.0                            | 1.0                      | 60.1                | 16.0                 | 23.8                 |                       |                       | 71.8                | 11.5                |
| Chem. Eng. Technol. 38, 2015, No.12, 2243-2252 | La/MgO                    | 1008     | 7.0                            | 1.0                      | 92.1                | 17.6                 | 34.5                 |                       |                       | 65.5                | 11.5                |
| Chem. Eng. Technol. 38, 2015, No.12, 2243-2252 | La/MgO                    | 1098     | 7.0                            | 1.0                      | 84.9                | 16.7                 | 32.8                 |                       |                       | 67.2                | 11.2                |
| Chem. Eng. Technol. 38, 2015, No.12, 2243-2252 | La/MgO                    | 1193     | 4.0                            | 1.0                      | 97.1                | 15.5                 | 51.3                 |                       |                       | 48.7                | 7.5                 |
| Chem. Eng. Technol. 38, 2015, No.12, 2243-2252 | La/MgO                    | 1273     | 4.0                            | 1.0                      | 89.8                | 15.3                 | 49.0                 |                       |                       | 51.0                | 7.8                 |
| Chem. Eng. Technol. 38, 2015, No.12, 2243-2252 | La/MgO                    | 1163     | 4.0                            | 1.0                      | 94.5                | 14.8                 | 51.8                 |                       |                       | 48.2                | 7.1                 |

**Table S1: Database with catalyst composition and their performance in OCM reaction under different conditions.**

| Reference                             | Catalyst            | Temp., K | $p(\text{CH}_4)/p(\text{O}_2)$ | $p_{\text{total}}$ , bar | $X(\text{O}_2)$ , % | $X(\text{CH}_4)$ , % | $S(\text{CO}_x)$ , % | $S(\text{C}_2^-)$ , % | $S(\text{C}_2^-)$ , % | $S(\text{C}_2)$ , % | $Y(\text{C}_2)$ , % |
|---------------------------------------|---------------------|----------|--------------------------------|--------------------------|---------------------|----------------------|----------------------|-----------------------|-----------------------|---------------------|---------------------|
| Fuel Proc Techn 133 (2015) 29-34      | NaCl-Mn-Na2WO4/SiO2 | 1023     | 1.6                            | 1.0                      | 80.7                | 55.0                 | 37.1                 | 56.8                  | 4.4                   | 61.2                | 33.7                |
| Fuel Proc Techn 133 (2015) 29-34      | KCl-Mn-Na2WO4/SiO2  | 1023     | 1.6                            | 1.0                      | 45.5                | 35.9                 | 24.7                 | 61.2                  | 11.2                  | 72.4                | 26.0                |
| Fuel Proc Techn 133 (2015) 29-34      | CsCl-Mn-Na2WO4/SiO2 | 1023     | 1.6                            | 1.0                      | 37.3                | 30.1                 | 25.1                 | 58.1                  | 13.9                  | 72.0                | 21.7                |
| Fuel Proc Techn 133 (2015) 29-34      | LiCl-Mn-Na2WO4/SiO2 | 1023     | 1.6                            | 1.0                      | 14.1                | 14.1                 | 19.8                 | 45.3                  | 33.7                  | 79.0                | 11.1                |
| Fuel Proc Techn 133 (2015) 29-34      | Mn/Na2WO4/SiO2      | 1023     | 1.6                            | 1.0                      | 8.2                 | 8.2                  | 36.6                 | 20.4                  | 43.0                  | 63.4                | 5.2                 |
| Fuel Proc Techn 133 (2015) 29-34      | NaCl-Mn/SiO2        | 1023     | 1.6                            | 1.0                      | 52.2                | 52.2                 | 41.6                 | 52.3                  | 4.6                   | 56.9                | 29.7                |
| Fuel Proc Techn 133 (2015) 29-34      | Mn/SiO2             | 1023     | 1.6                            | 1.0                      | 18.3                | 18.3                 | 91.7                 | 3.4                   | 4.8                   | 8.2                 | 1.5                 |
| J. Catal. 329, 2015, 560-573          | MgO                 | 1023     | 3.0                            | 1.0                      | 5.0                 | 2.0                  | 95.0                 | 0.0                   | 5.0                   | 5.0                 | 0.1                 |
| J. Catal. 329, 2015, 560-573          | MgO                 | 1023     | 3.0                            | 1.0                      | 75.0                | 23.0                 | 72.0                 | 11.7                  | 16.3                  | 28.0                | 6.4                 |
| J. Catal. 329, 2015, 560-573          | MgO                 | 1023     | 3.0                            | 1.0                      | 87.0                | 26.0                 | 70.0                 | 15.1                  | 14.9                  | 30.0                | 7.8                 |
| J. Catal. 329, 2015, 560-573          | MgO                 | 1023     | 3.0                            | 1.0                      | 27.0                | 8.0                  | 95.0                 | 0.8                   | 4.2                   | 5.0                 | 0.4                 |
| J. Catal. 329, 2015, 560-573          | MgO                 | 1023     | 3.0                            | 1.0                      | 98.0                | 30.0                 | 59.0                 | 24.1                  | 16.9                  | 41.0                | 12.3                |
| J. Mem. Sci. 488. 2015. 182-193       | BiYSm/LSCF          | 973      |                                | 1.0                      |                     | 15.0                 | 26.0                 |                       |                       | 74.0                | 11.1                |
| J. Mem. Sci. 488. 2015. 182-193       | BiYSm/LSCF          | 1023     |                                | 1.0                      |                     | 16.0                 | 22.0                 |                       |                       | 78.0                | 12.5                |
| J. Mem. Sci. 488. 2015. 182-193       | BiYSm/LSCF          | 1073     |                                | 1.0                      |                     | 20.0                 | 20.0                 |                       |                       | 80.0                | 16.0                |
| J. Mem. Sci. 488. 2015. 182-193       | BiYSm/LSCF          | 1123     |                                | 1.0                      |                     | 28.0                 | 11.0                 |                       |                       | 89.0                | 24.9                |
| J. Mem. Sci. 488. 2015. 182-193       | BiYSm/LSCF          | 1173     |                                | 1.0                      |                     | 39.0                 | 17.0                 |                       |                       | 83.0                | 32.4                |
| J. Mem. Sci. 488. 2015. 182-193       | BiYSm/LSCF          | 973      |                                | 1.0                      |                     | 22.0                 | 59.0                 |                       |                       | 41.0                | 9.0                 |
| J. Mem. Sci. 488. 2015. 182-193       | BiYSm/LSCF          | 1023     |                                | 1.0                      |                     | 22.5                 | 49.5                 |                       |                       | 50.5                | 11.4                |
| J. Mem. Sci. 488. 2015. 182-193       | BiYSm/LSCF          | 1073     |                                | 1.0                      |                     | 30.0                 | 40.0                 |                       |                       | 60.0                | 18.0                |
| J. Mem. Sci. 488. 2015. 182-193       | BiYSm/LSCF          | 1123     |                                | 1.0                      |                     | 47.0                 | 39.0                 |                       |                       | 61.0                | 28.7                |
| J. Mem. Sci. 488. 2015. 182-193       | BiYSm/LSCF          | 1173     |                                | 1.0                      |                     | 58.0                 | 40.0                 |                       |                       | 60.0                | 34.8                |
| J. Mem. Sci. 488. 2015. 182-193       | BiYSm/LSCF          | 973      |                                | 1.0                      |                     | 15.0                 | 50.0                 |                       |                       | 50.0                | 7.5                 |
| J. Mem. Sci. 488. 2015. 182-193       | BiYSm/LSCF          | 1023     |                                | 1.0                      |                     | 18.0                 | 40.0                 |                       |                       | 60.0                | 10.8                |
| J. Mem. Sci. 488. 2015. 182-193       | BiYSm/LSCF          | 1073     |                                | 1.0                      |                     | 26.0                 | 31.0                 |                       |                       | 69.0                | 17.9                |
| J. Mem. Sci. 488. 2015. 182-193       | BiYSm/LSCF          | 1123     |                                | 1.0                      |                     | 41.0                 | 28.0                 |                       |                       | 72.0                | 29.5                |
| J. Mem. Sci. 488. 2015. 182-193       | BiYSm/LSCF          | 1173     |                                | 1.0                      |                     | 49.0                 | 21.0                 |                       |                       | 79.0                | 38.7                |
| Nanoscale 7 (2015) 2260-2264          | SrO                 | 973      | 3.0                            | 1.0                      |                     | 37.0                 | 48.6                 |                       |                       | 51.4                | 19.0                |
| Nanoscale 7 (2015) 2260-2264          | Ba-La2O3            | 973      | 3.0                            | 1.0                      |                     | 34.0                 | 52.9                 |                       |                       | 47.1                | 16.0                |
| Nanoscale 7 (2015) 2260-2264          | Ca-La2O3            | 973      | 3.0                            | 1.0                      |                     | 33.5                 | 51.6                 |                       |                       | 48.4                | 16.2                |
| Nanoscale 7 (2015) 2260-2264          | K-La2O3             | 973      | 3.0                            | 1.0                      |                     | 32.0                 | 53.1                 |                       |                       | 46.9                | 15.0                |
| Petroleum Chemistry 55 (2015) 163-168 | Li-W-Mn/SiO2        | 1137     | 2.2                            | 1.0                      | 94.0                | 43.0                 | 55.0                 | 33.0                  | 6.0                   | 39.0                | 16.8                |
| Petroleum Chemistry 55 (2015) 163-168 | Li-W-Mn/SiO2        | 1156     | 1.9                            | 1.0                      | 93.0                | 43.0                 | 54.0                 | 35.0                  | 5.0                   | 40.0                | 17.2                |
| Petroleum Chemistry 55 (2015) 163-168 | Li-W-Mn/SiO2        | 1178     | 2.0                            | 1.0                      | 94.0                | 43.0                 | 57.0                 | 33.0                  | 3.0                   | 36.0                | 15.5                |
| Petroleum Chemistry 55 (2015) 163-168 | Li-W-Mn/SiO2        | 1194     | 1.6                            | 1.0                      | 96.0                | 43.0                 | 60.0                 | 31.0                  | 2.0                   | 33.0                | 14.2                |
| Petroleum Chemistry 55 (2015) 163-168 | Li-W-Mn/SiO2        | 1152     | 2.1                            | 1.0                      | 86.0                | 38.0                 | 60.0                 | 30.0                  | 5.0                   | 35.0                | 13.3                |
| Petroleum Chemistry 55 (2015) 163-168 | Li-W-Mn/SiO2        | 1172     | 1.9                            | 1.0                      | 90.0                | 40.0                 | 61.0                 | 29.0                  | 4.0                   | 33.0                | 13.2                |
| Petroleum Chemistry 55 (2015) 163-168 | Li-W-Mn/SiO2        | 1186     | 2.4                            | 1.0                      | 89.0                | 41.0                 | 63.0                 | 27.0                  | 3.0                   | 30.0                | 12.3                |
| Petroleum Chemistry 55 (2015) 163-168 | Li-W-Mn/SiO2        | 1194     | 1.9                            | 1.0                      | 93.0                | 39.0                 | 63.0                 | 27.0                  | 3.0                   | 30.0                | 11.7                |
| Petroleum Chemistry 55 (2015) 163-168 | Li-W-Mn/SiO2        | 1152     | 2.0                            | 1.0                      | 43.0                | 18.0                 | 60.0                 | 24.0                  | 13.0                  | 37.0                | 6.7                 |
| Petroleum Chemistry 55 (2015) 163-168 | Li-W-Mn/SiO2        | 1167     | 1.9                            | 1.0                      | 53.0                | 23.0                 | 62.0                 | 25.0                  | 9.0                   | 34.0                | 7.8                 |
| Petroleum Chemistry 55 (2015) 163-168 | Li-W-Mn/SiO2        | 1183     | 2.0                            | 1.0                      | 64.0                | 29.0                 | 67.0                 | 23.0                  | 6.0                   | 29.0                | 8.4                 |
| Petroleum Chemistry 55 (2015) 163-168 | Li-W-Mn/SiO2        | 1199     | 2.1                            | 1.0                      | 75.0                | 34.0                 | 72.0                 | 22.0                  | 5.0                   | 27.0                | 9.2                 |

**Table S1: Database with catalyst composition and their performance in OCM reaction under different conditions.**

| Reference                                 | Catalyst       | Temp., K | $p(\text{CH}_4)/p(\text{O}_2)$ | $p_{\text{total}}$ , bar | $X(\text{O}_2)$ , % | $X(\text{CH}_4)$ , % | $S(\text{CO}_x)$ , % | $S(\text{C}_2^-)$ , % | $S(\text{C}_2^-)$ , % | $S(\text{C}_2)$ , % | $Y(\text{C}_2)$ , % |
|-------------------------------------------|----------------|----------|--------------------------------|--------------------------|---------------------|----------------------|----------------------|-----------------------|-----------------------|---------------------|---------------------|
| Petroleum Chemistry 55 (2015) 163-168     | Li-W-Mn/SiO2   | 1159     | 2.0                            | 1.0                      | 99.0                | 39.0                 | 58.0                 | 34.0                  | 4.0                   | 38.0                | 14.8                |
| Petroleum Chemistry 55 (2015) 163-168     | Li-W-Mn/SiO2   | 1174     | 2.0                            | 1.0                      | 99.0                | 41.0                 | 60.0                 | 32.0                  | 3.0                   | 35.0                | 14.4                |
| Petroleum Chemistry 55 (2015) 163-168     | Li-W-Mn/SiO2   | 1185     | 2.0                            | 1.0                      | 100.0               | 42.0                 | 61.0                 | 31.0                  | 2.0                   | 33.0                | 13.9                |
| Petroleum Chemistry 55 (2015) 163-168     | Li-W-Mn/SiO2   | 1193     | 1.9                            | 1.0                      | 100.0               | 43.0                 | 62.0                 | 30.0                  | 2.0                   | 32.0                | 13.8                |
| Petroleum Chemistry 55 (2015) 163-168     | Li-W-Mn/SiO2   | 1143     | 2.0                            | 1.0                      | 74.0                | 25.0                 | 45.0                 | 37.0                  | 11.0                  | 48.0                | 12.0                |
| Petroleum Chemistry 55 (2015) 163-168     | Li-W-Mn/SiO2   | 1162     | 2.0                            | 1.0                      | 84.0                | 44.0                 | 52.0                 | 34.0                  | 7.0                   | 41.0                | 18.0                |
| Petroleum Chemistry 55 (2015) 163-168     | Li-W-Mn/SiO2   | 1184     | 2.0                            | 1.0                      | 90.0                | 40.0                 | 64.0                 | 26.0                  | 3.0                   | 29.0                | 11.6                |
| Petroleum Chemistry 55 (2015) 163-168     | Li-W-Mn/SiO2   | 1197     | 1.9                            | 1.0                      | 95.0                | 43.0                 | 63.0                 | 24.0                  | 4.0                   | 28.0                | 12.0                |
| Petroleum Chemistry 55 (2015) 163-168     | Li-W-Mn/SiO2   | 1133     | 1.8                            | 1.0                      | 77.0                | 32.0                 | 57.0                 | 32.0                  | 7.0                   | 39.0                | 12.5                |
| Petroleum Chemistry 55 (2015) 163-168     | Li-W-Mn/SiO2   | 1157     | 2.1                            | 1.0                      | 85.0                | 37.0                 | 59.0                 | 31.0                  | 5.0                   | 36.0                | 13.3                |
| Petroleum Chemistry 55 (2015) 163-168     | Li-W-Mn/SiO2   | 1174     | 2.0                            | 1.0                      | 91.0                | 39.0                 | 61.0                 | 30.0                  | 3.0                   | 33.0                | 12.9                |
| Petroleum Chemistry 55 (2015) 163-168     | Li-W-Mn/SiO2   | 1185     | 2.1                            | 1.0                      | 93.0                | 42.0                 | 61.0                 | 29.0                  | 3.0                   | 32.0                | 13.4                |
| Petroleum Chemistry 55 (2015) 163-168     | Li-W-Mn/SiO2   | 1133     | 1.8                            | 1.0                      | 98.0                | 42.0                 | 59.0                 | 30.0                  | 7.0                   | 37.0                | 15.5                |
| Petroleum Chemistry 55 (2015) 163-168     | Li-W-Mn/SiO2   | 1157     | 1.7                            | 1.0                      | 98.0                | 43.0                 | 58.0                 | 32.0                  | 4.0                   | 36.0                | 15.5                |
| Petroleum Chemistry 55 (2015) 163-168     | Li-W-Mn/SiO2   | 1172     | 1.8                            | 1.0                      | 98.0                | 47.0                 | 56.0                 | 29.0                  | 8.0                   | 37.0                | 17.4                |
| Petroleum Chemistry 55 (2015) 163-168     | Li-W-Mn/SiO2   | 1192     | 1.7                            | 1.0                      | 98.0                | 44.0                 | 58.0                 | 31.0                  | 3.0                   | 34.0                | 15.0                |
| Petroleum Chemistry 55 (2015) 163-168     | Li-W-Mn/SiO2   | 1135     | 1.9                            | 1.0                      | 82.0                | 34.0                 | 58.0                 | 32.0                  | 6.0                   | 38.0                | 12.9                |
| Petroleum Chemistry 55 (2015) 163-168     | Li-W-Mn/SiO2   | 1154     | 2.0                            | 1.0                      | 89.0                | 39.0                 | 58.0                 | 31.0                  | 4.0                   | 35.0                | 13.7                |
| Petroleum Chemistry 55 (2015) 163-168     | Li-W-Mn/SiO2   | 1175     | 2.1                            | 1.0                      | 95.0                | 43.0                 | 59.0                 | 30.0                  | 5.0                   | 35.0                | 15.1                |
| Petroleum Chemistry 55 (2015) 163-168     | Li-W-Mn/SiO2   | 1194     | 1.9                            | 1.0                      | 98.0                | 43.0                 | 61.0                 | 27.0                  | 3.0                   | 30.0                | 12.9                |
| Petroleum Chemistry 55 (2015) 163-168     | Li-W-Mn/SiO2   | 1153     | 2.0                            | 1.0                      | 83.0                | 36.0                 | 60.0                 | 31.0                  | 5.0                   | 36.0                | 13.0                |
| Petroleum Chemistry 55 (2015) 163-168     | Li-W-Mn/SiO2   | 1169     | 2.0                            | 1.0                      | 84.0                | 38.0                 | 60.0                 | 29.0                  | 5.0                   | 34.0                | 12.9                |
| Petroleum Chemistry 55 (2015) 163-168     | Li-W-Mn/SiO2   | 1181     | 2.2                            | 1.0                      | 85.0                | 39.0                 | 62.0                 | 28.0                  | 3.0                   | 31.0                | 12.1                |
| Petroleum Chemistry 55 (2015) 163-168     | Li-W-Mn/SiO2   | 1191     | 2.0                            | 1.0                      | 89.0                | 40.0                 | 64.0                 | 26.0                  | 4.0                   | 30.0                | 12.0                |
| Petroleum Chemistry 55 (2015) 163-168     | Li-W-Mn/SiO2   | 1151     | 2.0                            | 1.0                      | 79.0                | 33.0                 | 65.0                 | 27.0                  | 5.0                   | 32.0                | 10.6                |
| Petroleum Chemistry 55 (2015) 163-168     | Li-W-Mn/SiO2   | 1174     | 1.8                            | 1.0                      | 91.0                | 39.0                 | 71.0                 | 22.0                  | 2.0                   | 24.0                | 9.4                 |
| Petroleum Chemistry 55 (2015) 163-168     | Li-W-Mn/SiO2   | 1193     | 1.9                            | 1.0                      | 96.0                | 41.0                 | 74.0                 | 18.0                  | 1.0                   | 19.0                | 7.8                 |
| Appl. Catal. A 524, 2016, 192-199         | Fe-Al-Si-Ca-O  | 1023     | 9.9                            | 1.0                      |                     | 5.1                  | 86.0                 |                       |                       | 14.0                | 0.7                 |
| Appl. Catal. A 524, 2016, 192-199         | Fe-Al-Si-Ca-O  | 1023     | 9.9                            | 1.0                      |                     | 6.4                  | 90.0                 |                       |                       | 10.0                | 0.6                 |
| Appl. Catal. A 524, 2016, 192-199         | Fe-Al-Si-Ca-O  | 1023     | 9.9                            | 1.0                      |                     | 6.3                  | 91.0                 |                       |                       | 9.0                 | 0.6                 |
| Appl. Catal. A 524, 2016, 192-199         | Fe-Al-Si-Ca-O  | 1023     | 9.9                            | 1.0                      |                     | 3.3                  | 72.5                 |                       |                       | 27.5                | 0.9                 |
| Appl. Catal. A 524, 2016, 192-199         | Fe-Al-Si-Ca-O  | 1023     | 9.9                            | 1.0                      |                     | 1.8                  | 60.0                 |                       |                       | 40.0                | 0.7                 |
| Appl. Catal. A 524, 2016, 192-199         | Fe-Al-Si-Ca-O  | 1023     | 9.9                            | 1.0                      |                     | 2.3                  | 42.0                 |                       |                       | 58.0                | 1.3                 |
| Appl. Catal. A 524, 2016, 192-199         | Fe-Al-Si-Ca-O  | 1023     | 9.9                            | 1.0                      |                     | 4.5                  | 51.0                 |                       |                       | 49.0                | 2.2                 |
| Appl. Catal. A 524, 2016, 192-199         | Fe-Al-Si-Ca-O  | 1023     | 9.9                            | 1.0                      |                     | 3.0                  | 52.5                 |                       |                       | 47.5                | 1.4                 |
| Appl. Catal. A 524, 2016, 192-199         | Fe-Al-Si-Ca-O  | 1023     | 9.9                            | 1.0                      |                     | 3.5                  | 46.0                 |                       |                       | 54.0                | 1.9                 |
| Appl. Catal. A 524, 2016, 192-199         | Fe-Al-Si-Ca-O  | 1023     | 9.9                            | 1.0                      |                     | 2.8                  | 41.0                 |                       |                       | 59.0                | 1.7                 |
| Appl. Catal. A 524, 2016, 192-199         | Fe-Al-Si-Ca-O  | 1023     | 9.9                            | 1.0                      |                     | 2.5                  | 43.0                 |                       |                       | 57.0                | 1.4                 |
| App. Catal. A: General 525. 2016. 168-179 | Na2WO4/Mn/SiO2 | 1023     | 4.0                            | 1.0                      |                     | 6.7                  | 47.1                 |                       |                       | 52.9                | 3.6                 |
| App. Catal. A: General 525. 2016. 168-179 | Na2WO4/Mn/SiO2 | 1023     | 4.0                            | 1.0                      |                     | 2.0                  | 36.4                 |                       |                       | 63.6                | 1.3                 |
| App. Catal. A: General 525. 2016. 168-179 | Na2WO4/Mn/SiO2 | 1023     | 4.0                            | 1.0                      |                     | 7.4                  | 38.7                 |                       |                       | 61.3                | 4.5                 |
| App. Catal. A: General 525. 2016. 168-179 | Na2WO4/Mn/SiO2 | 1023     | 4.0                            | 1.0                      |                     | 7.3                  | 39.3                 |                       |                       | 60.7                | 4.5                 |
| App. Catal. A: General 525. 2016. 168-179 | Na2WO4/Mn/SiO2 | 1023     | 4.0                            | 1.0                      |                     | 7.1                  | 31.1                 |                       |                       | 68.9                | 4.9                 |

**Table S1: Database with catalyst composition and their performance in OCM reaction under different conditions.**

| Reference                                        | Catalyst                                             | Temp., K | p(CH <sub>4</sub> )/p(O <sub>2</sub> ) | p <sub>total</sub> , bar | X(O <sub>2</sub> ), % | X(CH <sub>4</sub> ), % | S(CO <sub>x</sub> ), % | S(C <sub>2</sub> <sup>-</sup> ), % | S(C <sub>2</sub> -), % | S(C <sub>2</sub> ), % | Y(C <sub>2</sub> ), % |
|--------------------------------------------------|------------------------------------------------------|----------|----------------------------------------|--------------------------|-----------------------|------------------------|------------------------|------------------------------------|------------------------|-----------------------|-----------------------|
| App. Catal. A: General 525. 2016. 168-179        | Na <sub>2</sub> WO <sub>4</sub> /Mn/SiO <sub>2</sub> | 1023     | 4.0                                    | 1.0                      |                       | 6.4                    | 44.6                   |                                    |                        | 55.4                  | 3.5                   |
| App. Catal. A: General 525. 2016. 168-179        | Na <sub>2</sub> WO <sub>4</sub> /Mn/SiO <sub>2</sub> | 1023     | 4.0                                    | 1.0                      |                       | 6.6                    | 37.4                   |                                    |                        | 62.6                  | 4.2                   |
| App. Catal. A: General 525. 2016. 168-179        | Na <sub>2</sub> WO <sub>4</sub> /Mn/SiO <sub>2</sub> | 1023     | 4.0                                    | 1.0                      |                       | 5.9                    | 42.6                   |                                    |                        | 57.4                  | 3.3                   |
| App. Catal. A: General 525. 2016. 168-179        | Na <sub>2</sub> WO <sub>4</sub> /Mn/SiO <sub>2</sub> | 1023     | 4.0                                    | 1.0                      |                       | 4.4                    | 19.7                   |                                    |                        | 80.3                  | 3.5                   |
| App. Catal. A: General 525. 2016. 168-179        | Na <sub>2</sub> WO <sub>4</sub> /Mn/SiO <sub>2</sub> | 1023     | 4.0                                    | 1.0                      |                       | 7.0                    | 24.2                   |                                    |                        | 75.8                  | 5.4                   |
| App. Catal. A: General 525. 2016. 168-179        | Na <sub>2</sub> WO <sub>4</sub> /Mn/SiO <sub>2</sub> | 1023     | 4.0                                    | 1.0                      |                       | 14.1                   | 26.6                   |                                    |                        | 73.4                  | 10.4                  |
| App. Catal. A: General 525. 2016. 168-179        | Na <sub>2</sub> WO <sub>4</sub> /Mn/SiO <sub>2</sub> | 998      | 4.0                                    | 1.0                      |                       | 8.2                    | 63.7                   |                                    |                        | 36.3                  | 3.0                   |
| App. Catal. A: General 525. 2016. 168-179        | Na <sub>2</sub> WO <sub>4</sub> /Mn/SiO <sub>2</sub> | 998      | 4.0                                    | 1.0                      |                       | 5.0                    | 76.6                   |                                    |                        | 23.4                  | 1.2                   |
| App. Catal. A: General 525. 2016. 168-179        | Na <sub>2</sub> WO <sub>4</sub> /Mn/SiO <sub>2</sub> | 998      | 4.0                                    | 1.0                      |                       | 0.7                    | 70.0                   |                                    |                        | 30.0                  | 0.2                   |
| App. Catal. A: General 525. 2016. 168-179        | Na <sub>2</sub> WO <sub>4</sub> /Mn/SiO <sub>2</sub> | 1023     | 4.0                                    | 1.0                      |                       | 16.5                   | 48.6                   |                                    |                        | 51.4                  | 8.5                   |
| App. Catal. A: General 525. 2016. 168-179        | Na <sub>2</sub> WO <sub>4</sub> /Mn/SiO <sub>2</sub> | 1023     | 4.0                                    | 1.0                      |                       | 10.1                   | 58.2                   |                                    |                        | 41.8                  | 4.2                   |
| App. Catal. A: General 525. 2016. 168-179        | Na <sub>2</sub> WO <sub>4</sub> /Mn/SiO <sub>2</sub> | 1023     | 4.0                                    | 1.0                      |                       | 1.5                    | 50.4                   |                                    |                        | 49.6                  | 0.7                   |
| App. Catal. A: General 525. 2016. 168-179        | Na <sub>2</sub> WO <sub>4</sub> /Mn/SiO <sub>2</sub> | 1048     | 4.0                                    | 1.0                      |                       | 25.2                   | 40.6                   |                                    |                        | 59.4                  | 15.0                  |
| App. Catal. A: General 525. 2016. 168-179        | Na <sub>2</sub> WO <sub>4</sub> /Mn/SiO <sub>2</sub> | 1048     | 4.0                                    | 1.0                      |                       | 17.9                   | 45.2                   |                                    |                        | 54.8                  | 9.8                   |
| App. Catal. A: General 525. 2016. 168-179        | Na <sub>2</sub> WO <sub>4</sub> /Mn/SiO <sub>2</sub> | 1048     | 4.0                                    | 1.0                      |                       | 3.5                    | 31.2                   |                                    |                        | 68.8                  | 2.4                   |
| Appl. Catal. B. 199, 2016, 252-259               | Sr/La <sub>2</sub> O <sub>3</sub>                    | 1023     | 4.0                                    | 1.9                      |                       | 7.0                    | 76.6                   |                                    |                        | 23.4                  | 1.6                   |
| Appl. Catal. B. 199, 2016, 252-259               | La-Sr/CaO                                            | 1020     | 4.0                                    | 1.9                      |                       | 3.2                    | 73.3                   |                                    |                        | 26.7                  | 0.9                   |
| Appl. Catal. B. 199, 2016, 252-259               | Na <sub>2</sub> WO <sub>4</sub> /Mn/SiO <sub>2</sub> | 1021     | 4.0                                    | 1.2                      |                       | 2.1                    | 47.5                   |                                    |                        | 52.5                  | 1.1                   |
| Appl. Catal. B. 199, 2016, 252-259               | Li/MgO                                               | 1023     | 4.0                                    | 1.1                      |                       | 0.9                    | 51.0                   |                                    |                        | 49.0                  | 0.4                   |
| Appl. Catal. B. 199, 2016, 252-259               | Sn-Li/MgO                                            | 1023     | 3.5                                    | 1.2                      |                       | 12.4                   | 41.9                   |                                    |                        | 58.1                  | 7.2                   |
| Catal. Commun. 85, 2016, 75-78                   | Na <sub>2</sub> WO <sub>4</sub> /Mn/SiO <sub>2</sub> | 1048     | 4.0                                    | 1.0                      |                       | 24.0                   | 39.5                   | 33.5                               | 27.0                   | 60.5                  | 14.5                  |
| Catal. Commun. 85, 2016, 75-78                   | Na <sub>2</sub> WO <sub>4</sub> /Mn/SiO <sub>2</sub> | 1048     | 4.0                                    | 1.0                      |                       | 9.2                    | 27.0                   | 28.0                               | 45.0                   | 73.0                  | 6.7                   |
| Catal. Commun. 85, 2016, 75-78                   | Na <sub>2</sub> WO <sub>4</sub> /Mn/SiO <sub>2</sub> | 1048     | 4.0                                    | 1.0                      |                       | 10.9                   | 25.9                   | 26.2                               | 47.9                   | 74.1                  | 8.1                   |
| Catal. Commun. 85, 2016, 75-78                   | Na <sub>2</sub> WO <sub>4</sub> /Mn/SiO <sub>2</sub> | 1048     | 4.0                                    | 1.0                      |                       | 7.2                    | 24.5                   | 27.6                               | 47.9                   | 75.5                  | 5.4                   |
| Chem. Eng. J. 306, 2016, 646-654                 | Na <sub>2</sub> WO <sub>4</sub> /Mn/SiO <sub>2</sub> | 1073     | 3.0                                    | 1.0                      | 100.0                 | 29.0                   | 37.0                   |                                    |                        | 63.0                  | 18.3                  |
| Chem. Eng. J. 306, 2016, 646-654                 | Na <sub>2</sub> WO <sub>4</sub> /Mn/SiO <sub>2</sub> | 1073     | 3.0                                    | 1.0                      | 100.0                 | 18.0                   | 19.0                   |                                    |                        | 81.0                  | 14.6                  |
| Chem. Eng. J. 306, 2016, 646-654                 | Na <sub>2</sub> WO <sub>4</sub> /Mn/SiO <sub>2</sub> | 1048     |                                        | 1.0                      |                       | 29.0                   | 26.0                   |                                    |                        | 74.0                  | 21.5                  |
| Chem. Eng. J. 306, 2016, 646-654                 | Na <sub>2</sub> WO <sub>4</sub> /Mn/SiO <sub>2</sub> | 1023     |                                        | 1.0                      |                       | 18.0                   | 11.0                   |                                    |                        | 89.0                  | 16.0                  |
| Chem. Eng. J. 306, 2016, 646-654                 | Na <sub>2</sub> WO <sub>4</sub> /Mn/SiO <sub>2</sub> | 1048     |                                        | 1.0                      |                       | 21.0                   | 13.0                   |                                    |                        | 87.0                  | 18.3                  |
| Chem. Eng. J. 306, 2016, 646-654                 | Na <sub>2</sub> WO <sub>4</sub> /Mn/SiO <sub>2</sub> | 1023     |                                        | 1.0                      |                       | 19.0                   | 13.0                   |                                    |                        | 87.0                  | 16.5                  |
| Fuel 167, 2016, 208-217                          | Ca-PO <sub>4</sub> -OH                               | 973      | 2.7                                    | 1.0                      |                       | 26.0                   | 79.0                   |                                    |                        | 21.0                  | 5.5                   |
| Fuel 167, 2016, 208-217                          | Ca-CO <sub>3</sub> -OH                               | 973      | 2.7                                    | 1.0                      |                       | 5.5                    | 91.0                   |                                    |                        | 9.0                   | 0.5                   |
| Fuel 167, 2016, 208-217                          | Pb-Ca-CO <sub>3</sub> -OH                            | 973      | 2.7                                    | 1.0                      |                       | 26.0                   | 66.0                   |                                    |                        | 34.0                  | 8.8                   |
| Fuel 167, 2016, 208-217                          | Pb-Ca-PO <sub>4</sub> -OH                            | 973      | 2.7                                    | 1.0                      |                       | 22.5                   | 43.0                   |                                    |                        | 57.0                  | 12.8                  |
| Fuel Proc Tech 151. 2016. 148-154                | Na-W-Mn-Cl/SiO <sub>2</sub>                          | 1023     | 1.6                                    | 1.0                      |                       | 48.0                   | 33.0                   |                                    |                        | 67.0                  | 32.0                  |
| Fuel Proc Tech 151. 2016. 148-154                | Na-W-Mn-Cl/SiO <sub>2</sub>                          | 973      | 1.6                                    | 1.0                      |                       | 24.0                   | 25.0                   |                                    |                        | 75.0                  | 18.0                  |
| RSC Adv 6. 2016. 34872                           | La <sub>2</sub> O <sub>3</sub>                       | 823      | 3.0                                    | 1.0                      |                       | 9.9                    | 93.6                   |                                    |                        | 6.4                   | 0.6                   |
| RSC Adv 6. 2016. 34872                           | La <sub>2</sub> O <sub>3</sub>                       | 823      | 3.0                                    | 1.0                      |                       | 29.0                   | 59.5                   |                                    |                        | 40.5                  | 11.7                  |
| RSC Adv 6. 2016. 34872                           | La <sub>2</sub> O <sub>3</sub>                       | 823      | 3.0                                    | 1.0                      |                       | 32.3                   | 54.1                   |                                    |                        | 45.9                  | 14.8                  |
| RSC Adv 6. 2016. 34872                           | La <sub>2</sub> O <sub>3</sub>                       | 823      | 3.0                                    | 1.0                      |                       | 28.9                   | 58.4                   |                                    |                        | 41.6                  | 12.0                  |
| Sci. Rep. 6. 25154; DOI: 10.1038/srep25154(2016) | TBA-P-W/CeO <sub>2</sub>                             | 689      | 1.7                                    | 1.0                      | 20.6                  | 14.9                   |                        |                                    |                        | 43.4                  | 6.5                   |
| Sci. Rep. 6. 25154; DOI: 10.1038/srep25154(2016) | Ce-W/CeO <sub>2</sub>                                | 649      | 1.7                                    | 1.0                      | 18.5                  | 13.6                   |                        |                                    |                        | 39.0                  | 5.3                   |
| Sci. Rep. 6. 25154; DOI: 10.1038/srep25154(2016) | WO <sub>3</sub> /CeO <sub>2</sub>                    | 634      | 1.7                                    | 1.0                      | 20.8                  | 14.3                   |                        |                                    |                        | 32.4                  | 4.6                   |

**Table S1: Database with catalyst composition and their performance in OCM reaction under different conditions.**

| Reference                                        | Catalyst                          | Temp., K | $p(\text{CH}_4)/p(\text{O}_2)$ | $p_{\text{total}}$ , bar | $X(\text{O}_2)$ , % | $X(\text{CH}_4)$ , % | $S(\text{CO}_x)$ , % | $S(\text{C}_2^-)$ , % | $S(\text{C}_2^-)$ , % | $S(\text{C}_2)$ , % | $Y(\text{C}_2)$ , % |
|--------------------------------------------------|-----------------------------------|----------|--------------------------------|--------------------------|---------------------|----------------------|----------------------|-----------------------|-----------------------|---------------------|---------------------|
| Sci. Rep. 6. 25154; DOI: 10.1038/srep25154(2016) | CeO <sub>2</sub> -WO <sub>3</sub> | 659      | 1.7                            | 1.0                      | 11.6                | 9.7                  |                      |                       |                       | 41.2                | 4.0                 |
| Sci. Rep. 6. 25154; DOI: 10.1038/srep25154(2016) | WO <sub>3</sub>                   | 484      | 1.7                            | 1.0                      | 2.5                 | 0.0                  |                      |                       |                       | 0.0                 | 0.0                 |

**Table S2: Database with catalyst composition and their performance in methane oxidation to oxygenates under different reaction conditions.**

| Reference                        | Reactor | T / K | Phase | Oxidant        | Catalyst                                                                        | S (CH <sub>3</sub> OH) | S (CH <sub>2</sub> O) | S (CO)   | S (CO <sub>2</sub> ) | X (CH <sub>4</sub> ) | STY (CH <sub>3</sub> OH)<br>[kg kg <sub>Cat</sub> <sup>-1</sup> h <sup>-1</sup> ] | STY (CH <sub>2</sub> O)<br>[kg kg <sub>Cat</sub> <sup>-1</sup> h <sup>-1</sup> ] |
|----------------------------------|---------|-------|-------|----------------|---------------------------------------------------------------------------------|------------------------|-----------------------|----------|----------------------|----------------------|-----------------------------------------------------------------------------------|----------------------------------------------------------------------------------|
| J. Catal. 1987. 108(1): 252-255. | FBR     | 923   | gas   | O <sub>2</sub> | CaO/SiO <sub>2</sub>                                                            |                        | 6.32E-02              |          |                      | 2.31E-03             |                                                                                   | 5.75E-04                                                                         |
| J. Catal. 1987. 108(1): 252-255. | FBR     | 923   | gas   | O <sub>2</sub> | MgO/SiO <sub>2</sub>                                                            |                        | 3.09E-01              |          |                      | 5.38E-03             |                                                                                   | 6.55E-03                                                                         |
| J. Catal. 1987. 108(1): 252-255. | FBR     | 923   | gas   | O <sub>2</sub> | La <sub>2</sub> O <sub>3</sub> /SiO <sub>2</sub>                                |                        | 7.02E-02              |          |                      | 5.00E-03             |                                                                                   | 1.38E-03                                                                         |
| J. Catal. 1987. 108(1): 252-255. | FBR     | 923   | gas   | O <sub>2</sub> | Y <sub>2</sub> O <sub>3</sub> /SiO <sub>2</sub>                                 |                        | 0.00E+00              |          |                      | 8.85E-03             |                                                                                   | 0.00E+00                                                                         |
| J. Catal. 1987. 108(1): 252-255. | FBR     | 923   | gas   | O <sub>2</sub> | Al <sub>2</sub> O <sub>3</sub> /SiO <sub>2</sub>                                |                        | 1.54E-01              |          |                      | 1.37E-02             |                                                                                   | 8.31E-03                                                                         |
| J. Catal. 1987. 108(1): 252-255. | FBR     | 923   | gas   | O <sub>2</sub> | Ga <sub>2</sub> O <sub>3</sub> /SiO <sub>2</sub>                                |                        | 7.02E-03              |          |                      | 3.44E-02             |                                                                                   | 9.52E-04                                                                         |
| J. Catal. 1987. 108(1): 252-255. | FBR     | 923   | gas   | O <sub>2</sub> | Bi <sub>2</sub> O <sub>3</sub> /SiO <sub>2</sub>                                |                        | 1.75E-01              |          |                      | 2.67E-02             |                                                                                   | 1.85E-02                                                                         |
| J. Catal. 1987. 108(1): 252-255. | FBR     | 923   | gas   | O <sub>2</sub> | ZrO <sub>2</sub> /SiO <sub>2</sub>                                              |                        | 7.02E-03              |          |                      | 1.13E-02             |                                                                                   | 3.14E-04                                                                         |
| J. Catal. 1987. 108(1): 252-255. | FBR     | 923   | gas   | O <sub>2</sub> | Sb <sub>2</sub> O <sub>3</sub> /SiO <sub>2</sub>                                |                        | 5.65E-01              |          |                      | 5.00E-03             |                                                                                   | 1.11E-02                                                                         |
| J. Catal. 1987. 108(1): 252-255. | FBR     | 923   | gas   | O <sub>2</sub> | As <sub>2</sub> O <sub>3</sub> /SiO <sub>2</sub>                                |                        | 4.35E-01              |          |                      | 8.85E-03             |                                                                                   | 1.52E-02                                                                         |
| J. Catal. 1987. 108(1): 252-255. | FBR     | 923   | gas   | O <sub>2</sub> | B <sub>2</sub> O <sub>3</sub> /SiO <sub>2</sub>                                 |                        | 6.53E-01              |          |                      | 4.23E-03             |                                                                                   | 1.09E-02                                                                         |
| J. Catal. 1987. 108(1): 252-255. | FBR     | 923   | gas   | O <sub>2</sub> | Nb <sub>2</sub> O <sub>5</sub> /SiO <sub>2</sub>                                |                        | 4.74E-01              |          |                      | 8.27E-03             |                                                                                   | 1.54E-02                                                                         |
| J. Catal. 1987. 108(1): 252-255. | FBR     | 923   | gas   | O <sub>2</sub> | WO <sub>3</sub> /SiO <sub>2</sub>                                               |                        | 5.75E-01              |          |                      | 5.38E-03             |                                                                                   | 1.22E-02                                                                         |
| J. Catal. 1987. 108(1): 252-255. | FBR     | 923   | gas   | O <sub>2</sub> | P <sub>2</sub> O <sub>5</sub> /SiO <sub>2</sub>                                 |                        | 6.32E-01              |          |                      | 1.73E-03             |                                                                                   | 4.31E-03                                                                         |
| J. Catal. 1987. 108(1): 252-255. | FBR     | 923   | gas   | O <sub>2</sub> | B <sub>2</sub> O <sub>3</sub> /Ba <sub>2</sub> O <sub>3</sub> /SiO <sub>2</sub> |                        | 1.24E-01              |          |                      | 9.76E-04             |                                                                                   | 4.78E-04                                                                         |
| J. Catal. 1987. 108(1): 252-255. | FBR     | 923   | gas   | O <sub>2</sub> | B <sub>2</sub> O <sub>3</sub> /CaO/SiO <sub>2</sub>                             |                        | 7.91E-01              |          |                      | 2.68E-03             |                                                                                   | 8.36E-03                                                                         |
| J. Catal. 1987. 108(1): 252-255. | FBR     | 923   | gas   | O <sub>2</sub> | B <sub>2</sub> O <sub>3</sub> /MgO/SiO <sub>2</sub>                             |                        | 2.48E-01              |          |                      | 2.59E-02             |                                                                                   | 2.53E-02                                                                         |
| J. Catal. 1987. 108(1): 252-255. | FBR     | 923   | gas   | O <sub>2</sub> | B <sub>2</sub> O <sub>3</sub> /La <sub>2</sub> O <sub>3</sub> /SiO <sub>2</sub> |                        | 6.71E-01              |          |                      | 2.44E-03             |                                                                                   | 6.45E-03                                                                         |
| J. Catal. 1987. 108(1): 252-255. | FBR     | 923   | gas   | O <sub>2</sub> | B <sub>2</sub> O <sub>3</sub> /CeO <sub>2</sub> /SiO <sub>2</sub>               |                        | 2.66E-02              |          |                      | 6.83E-03             |                                                                                   | 7.17E-04                                                                         |
| J. Catal. 1987. 108(1): 252-255. | FBR     | 923   | gas   | O <sub>2</sub> | B <sub>2</sub> O <sub>3</sub> /Pr <sub>2</sub> O <sub>3</sub> /SiO <sub>2</sub> |                        | 5.38E-01              |          |                      | 4.39E-03             |                                                                                   | 9.32E-03                                                                         |
| J. Catal. 1987. 108(1): 252-255. | FBR     | 923   | gas   | O <sub>2</sub> | B <sub>2</sub> O <sub>3</sub> /Sm <sub>2</sub> O <sub>3</sub> /SiO <sub>2</sub> |                        | 7.21E-01              |          |                      | 2.44E-03             |                                                                                   | 6.93E-03                                                                         |
| J. Catal. 1987. 108(1): 252-255. | FBR     | 923   | gas   | O <sub>2</sub> | B <sub>2</sub> O <sub>3</sub> /Y <sub>2</sub> O <sub>3</sub> /SiO <sub>2</sub>  |                        | 4.04E-01              |          |                      | 1.95E-03             |                                                                                   | 3.11E-03                                                                         |
| J. Catal. 1987. 108(1): 252-255. | FBR     | 923   | gas   | O <sub>2</sub> | B <sub>2</sub> O <sub>3</sub> /Al <sub>2</sub> O <sub>3</sub> /SiO <sub>2</sub> |                        | 4.66E-01              |          |                      | 3.90E-03             |                                                                                   | 7.17E-03                                                                         |
| J. Catal. 1987. 108(1): 252-255. | FBR     | 923   | gas   | O <sub>2</sub> | B <sub>2</sub> O <sub>3</sub> /SnO <sub>2</sub> /SiO <sub>2</sub>               |                        | 1.40E-02              |          |                      | 3.02E-02             |                                                                                   | 1.67E-03                                                                         |
| J. Catal. 1987. 108(1): 252-255. | FBR     | 923   | gas   | O <sub>2</sub> | B <sub>2</sub> O <sub>3</sub> /Bi <sub>2</sub> O <sub>3</sub> /SiO <sub>2</sub> |                        | 2.98E-01              |          |                      | 1.22E-03             |                                                                                   | 1.43E-03                                                                         |
| J. Catal. 1987. 108(1): 252-255. | FBR     | 923   | gas   | O <sub>2</sub> | B <sub>2</sub> O <sub>3</sub> /ZrO <sub>2</sub> /SiO <sub>2</sub>               |                        | 9.94E-01              |          |                      | 4.88E-04             |                                                                                   | 1.91E-03                                                                         |
| J. Catal. 1987. 108(1): 252-255. | FBR     | 923   | gas   | O <sub>2</sub> | B <sub>2</sub> O <sub>3</sub> /Fe <sub>2</sub> O <sub>3</sub> /SiO <sub>2</sub> |                        | 8.54E-03              |          |                      | 3.90E-02             |                                                                                   | 1.31E-03                                                                         |
| J. Catal. 1987. 108(1): 252-255. | FBR     | 873   | gas   | O <sub>2</sub> | B <sub>2</sub> O <sub>3</sub> /Cab-O-Sil                                        |                        | 7.90E-01              |          |                      | 2.13E-03             |                                                                                   | 2.02E-03                                                                         |
| J. Catal. 1987. 108(1): 252-255. | FBR     | 873   | gas   | O <sub>2</sub> | B <sub>2</sub> O <sub>3</sub> /BeO/Cab-O-Sil                                    |                        | 3.47E-01              |          |                      | 2.74E-02             |                                                                                   | 1.14E-02                                                                         |
| J. Catal. 1987. 108(1): 252-255. | FBR     | 873   | gas   | O <sub>2</sub> | B <sub>2</sub> O <sub>3</sub> /MgO/Cab-O-Sil                                    |                        | 2.25E-01              |          |                      | 3.48E-02             |                                                                                   | 9.37E-03                                                                         |
| J. Catal. 1987. 108(1): 252-255. | FBR     | 873   | gas   | O <sub>2</sub> | B <sub>2</sub> O <sub>3</sub> /CaO/Cab-O-Sil                                    |                        | 4.40E-01              |          |                      | 6.71E-03             |                                                                                   | 3.53E-03                                                                         |
| J. Catal. 1987. 108(1): 252-255. | FBR     | 873   | gas   | O <sub>2</sub> | B <sub>2</sub> O <sub>3</sub> /SrO/Cab-O-Sil                                    |                        | 4.94E-01              |          |                      | 1.83E-03             |                                                                                   | 1.08E-03                                                                         |
| J. Catal. 1987. 108(1): 252-255. | FBR     | 873   | gas   | O <sub>2</sub> | B <sub>2</sub> O <sub>3</sub> /BaO/Cab-O-Sil                                    |                        | 4.94E-01              |          |                      | 1.22E-03             |                                                                                   | 7.20E-04                                                                         |
| Catal. Today 32 (1996) 171-175   | FBR     | 873   | gas   | O <sub>2</sub> | SiO <sub>2</sub>                                                                |                        | 1.00E+00              |          |                      | 2.00E-05             |                                                                                   | 3.05E-03                                                                         |
| Catal. Today 32 (1996) 171-175   | FBR     | 873   | gas   | O <sub>2</sub> | FeOx/SiO <sub>2</sub>                                                           |                        | 6.00E-01              | 2.50E-01 | 1.50E-01             | 4.70E-03             |                                                                                   | 4.31E-01                                                                         |
| Catal. Today 32 (1996) 171-175   | FBR     | 873   | gas   | O <sub>2</sub> | FeOx/SiO <sub>2</sub>                                                           |                        | 1.60E-01              | 2.60E-01 | 5.80E-01             | 5.50E-03             |                                                                                   | 1.34E-01                                                                         |
| Catal. Today 32 (1996) 171-175   | FBR     | 873   | gas   | O <sub>2</sub> | FeOx/SiO <sub>2</sub>                                                           |                        | 2.00E-02              | 2.30E-01 | 7.50E-01             | 1.75E-02             |                                                                                   | 5.35E-02                                                                         |
| Catal. Today 32 (1996) 171-175   | FBR     | 723   | gas   | O <sub>2</sub> | α-Fe <sub>2</sub> O <sub>3</sub>                                                |                        |                       |          | 1.00E+00             | 2.10E-03             |                                                                                   | 0.00E+00                                                                         |
| Catal. Today 32 (1996) 171-175   | FBR     | 873   | gas   | O <sub>2</sub> | WO <sub>3</sub>                                                                 |                        | 1.00E+00              | 0.00E+00 | 0.00E+00             | 6.00E-05             |                                                                                   | 4.58E-03                                                                         |
| Catal. Today 32 (1996) 171-175   | FBR     | 873   | gas   | O <sub>2</sub> | SnO <sub>2</sub> /WO <sub>3</sub>                                               |                        | 9.30E-01              | 7.00E-02 | 0.00E+00             | 1.10E-03             |                                                                                   | 7.81E-02                                                                         |

**Table S2: Database with catalyst composition and their performance in methane oxidation to oxygenates under different reaction conditions.**

| Reference                        | Reactor | T / K | Phase | Oxidant        | Catalyst                                                            | S (CH <sub>3</sub> OH) | S (CH <sub>2</sub> O) | S (CO)   | S (CO <sub>2</sub> ) | X (CH <sub>4</sub> ) | STY (CH <sub>3</sub> OH)<br>[kg kg <sub>Cat</sub> <sup>-1</sup> h <sup>-1</sup> ] | STY (CH <sub>2</sub> O)<br>[kg kg <sub>Cat</sub> <sup>-1</sup> h <sup>-1</sup> ] |
|----------------------------------|---------|-------|-------|----------------|---------------------------------------------------------------------|------------------------|-----------------------|----------|----------------------|----------------------|-----------------------------------------------------------------------------------|----------------------------------------------------------------------------------|
| Catal. Today 32 (1996) 171-175   | FBR     | 873   | gas   | O <sub>2</sub> | SnO <sub>x</sub> /WO <sub>3</sub>                                   |                        | 6.60E-01              | 3.10E-01 | 3.00E-02             | 2.60E-03             |                                                                                   | 1.31E-01                                                                         |
| Catal. Today 32 (1996) 171-175   | FBR     | 873   | gas   | O <sub>2</sub> | SnO <sub>2</sub>                                                    |                        |                       | 9.00E-02 | 9.10E-01             | 2.80E-02             |                                                                                   | 0.00E+00                                                                         |
| Catal. Today 32 (1996) 171-175   | FBR     | 873   | gas   | O <sub>2</sub> | WO <sub>x</sub> /SnO <sub>2</sub>                                   |                        | 4.00E-02              | 2.00E-01 | 7.60E-01             | 1.50E-02             |                                                                                   | 4.58E-02                                                                         |
| Catal. Today 32 (1996) 171-175   | FBR     | 873   | gas   | O <sub>2</sub> | WO <sub>x</sub> /SnO <sub>3</sub>                                   |                        | 5.10E-01              | 4.60E-01 | 3.00E-02             | 3.00E-03             |                                                                                   | 1.17E-01                                                                         |
| Catal. Today 32 (1996) 171-175   | FBR     | 873   | gas   | O <sub>2</sub> | WO <sub>x</sub> /SnO <sub>4</sub>                                   |                        | 5.10E-01              | 4.60E-01 | 3.00E-02             | 3.00E-03             |                                                                                   | 1.17E-01                                                                         |
| Appl. Catal.A 172 (1998) 165-176 | FBR     | 923   | gas   | O <sub>2</sub> | Blank                                                               |                        |                       | 8.80E-02 | 9.12E-01             | 1.80E-02             |                                                                                   | 0.00E+00                                                                         |
| Appl. Catal.A 172 (1998) 165-176 | FBR     | 923   | gas   | O <sub>2</sub> | HZSM-5                                                              |                        |                       | 6.67E-01 | 3.33E-01             | 1.14E-01             |                                                                                   | 0.00E+00                                                                         |
| Appl. Catal.A 172 (1998) 165-176 | FBR     | 923   | gas   | O <sub>2</sub> | NaZSM-5                                                             |                        |                       | 3.80E-02 | 9.62E-01             | 4.10E-02             |                                                                                   | 0.00E+00                                                                         |
| Appl. Catal.A 172 (1998) 165-176 | FBR     | 923   | gas   | O <sub>2</sub> | WO <sub>x</sub> /HZSM-5                                             |                        | 2.90E-02              | 3.47E-01 | 6.24E-01             | 8.40E-02             |                                                                                   | 8.31E-03                                                                         |
| Appl. Catal.A 172 (1998) 165-176 | FBR     | 923   | gas   | O <sub>2</sub> | WO <sub>x</sub> /HZSM-5                                             |                        | 3.50E-02              | 2.50E-01 | 7.16E-01             | 9.80E-02             |                                                                                   | 1.17E-02                                                                         |
| Appl. Catal.A 172 (1998) 165-176 | FBR     | 923   | gas   | O <sub>2</sub> | WO <sub>x</sub> /HZSM-5                                             |                        | 5.20E-02              | 3.51E-01 | 5.96E-01             | 9.40E-02             |                                                                                   | 1.67E-02                                                                         |
| Appl. Catal.A 172 (1998) 165-176 | FBR     | 923   | gas   | O <sub>2</sub> | WO <sub>x</sub> /HZSM-5                                             |                        | 4.60E-02              | 4.13E-01 | 5.41E-01             | 1.10E-01             |                                                                                   | 1.73E-02                                                                         |
| Appl. Catal.A 172 (1998) 165-176 | FBR     | 923   | gas   | O <sub>2</sub> | WO <sub>x</sub> /HZSM-5                                             |                        | 4.90E-02              | 4.10E-01 | 5.41E-01             | 1.13E-01             |                                                                                   | 1.89E-02                                                                         |
| Appl. Catal.A 172 (1998) 165-176 | FBR     | 923   | gas   | O <sub>2</sub> | WO <sub>x</sub> /HZSM-5                                             |                        | 4.80E-02              | 4.72E-01 | 4.80E-01             | 1.10E-01             |                                                                                   | 1.80E-02                                                                         |
| Appl. Catal.A 172 (1998) 165-176 | FBR     | 923   | gas   | O <sub>2</sub> | WO <sub>x</sub> /HZSM-5                                             |                        | 4.10E-02              | 4.60E-01 | 5.00E-01             | 1.19E-01             |                                                                                   | 1.66E-02                                                                         |
| Appl. Catal.A 172 (1998) 165-176 | FBR     | 923   | gas   | O <sub>2</sub> | WO <sub>x</sub> /NaZSM-5                                            |                        | 1.40E-02              | 4.52E-01 | 5.34E-01             | 4.60E-02             |                                                                                   | 2.20E-03                                                                         |
| J. Catal. 190, 118–127 (2000)    | FBR     | 773   | gas   | O <sub>2</sub> | MoO <sub>x</sub> /SiO <sub>2</sub>                                  | 2.00E-02               | 3.20E-01              | 2.50E-01 | 4.10E-01             | 5.80E-03             | 1.99E-04                                                                          | 2.98E-03                                                                         |
| J. Catal. 190, 118–127 (2000)    | FBR     | 823   | gas   | O <sub>2</sub> | MoO <sub>x</sub> /SiO <sub>2</sub>                                  | 1.00E-02               | 1.30E-01              | 3.50E-01 | 5.10E-01             | 1.20E-02             | 2.06E-04                                                                          | 2.51E-03                                                                         |
| J. Catal. 190, 118–127 (2000)    | FBR     | 873   | gas   | O <sub>2</sub> | MoO <sub>x</sub> /SiO <sub>2</sub>                                  | 1.00E-02               | 1.20E-01              | 3.30E-01 | 5.40E-01             | 4.00E-02             | 6.86E-04                                                                          | 7.72E-03                                                                         |
| J. Catal. 190, 118–127 (2000)    | FBR     | 923   | gas   | O <sub>2</sub> | MoO <sub>x</sub> /SiO <sub>2</sub>                                  |                        | 1.00E-02              | 1.80E-01 | 8.10E-01             | 6.60E-02             |                                                                                   | 1.06E-03                                                                         |
| J. Catal. 190, 118–127 (2000)    | FBR     | 773   | gas   | O <sub>2</sub> | MoO <sub>x</sub> /SiO <sub>2</sub>                                  | 1.30E-01               | 7.30E-01              | 0.00E+00 | 1.40E-01             | 1.00E-02             | 2.23E-03                                                                          | 1.17E-02                                                                         |
| J. Catal. 190, 118–127 (2000)    | FBR     | 823   | gas   | O <sub>2</sub> | MoO <sub>x</sub> /SiO <sub>2</sub>                                  | 8.00E-02               | 5.20E-01              | 1.00E-01 | 3.00E-01             | 2.90E-02             | 3.98E-03                                                                          | 2.42E-02                                                                         |
| J. Catal. 190, 118–127 (2000)    | FBR     | 873   | gas   | O <sub>2</sub> | MoO <sub>x</sub> /SiO <sub>2</sub>                                  | 1.10E-01               | 3.50E-01              | 1.70E-01 | 3.70E-01             | 8.20E-02             | 1.55E-02                                                                          | 4.61E-02                                                                         |
| J. Catal. 190, 118–127 (2000)    | FBR     | 873   | gas   | O <sub>2</sub> | H <sub>4</sub> SiMo <sub>12</sub> O <sub>40</sub> /SiO <sub>2</sub> | 4.51E-02               | 8.56E-01              | 4.78E-02 | 5.07E-02             | 2.52E-01             | 1.30E-02                                                                          | 2.31E-01                                                                         |
| Catal. Today 55 (2000) 269–280   | FBR     | 773   | gas   | O <sub>2</sub> | FePO <sub>4</sub> /Al <sub>2</sub> O <sub>3</sub>                   |                        | 1.00E-02              | 4.40E-01 | 5.50E-01             | 4.10E-02             |                                                                                   | 1.70E-02                                                                         |
| Catal. Today 55 (2000) 269–280   | FBR     | 773   | gas   | O <sub>2</sub> | FePO <sub>4</sub> /Al <sub>2</sub> O <sub>3</sub>                   |                        | 1.00E-02              | 4.10E-01 | 5.80E-01             | 4.60E-02             |                                                                                   | 1.91E-02                                                                         |
| Catal. Today 55 (2000) 269–280   | FBR     | 773   | gas   | O <sub>2</sub> | FePO <sub>4</sub> /Al <sub>2</sub> O <sub>3</sub>                   |                        | 1.00E-02              | 4.60E-01 | 5.30E-01             | 3.90E-02             |                                                                                   | 1.62E-02                                                                         |
| Catal. Today 55 (2000) 269–280   | FBR     | 873   | gas   | O <sub>2</sub> | FePO <sub>4</sub> /ZrO <sub>2</sub>                                 |                        | 1.10E-01              | 6.00E-01 | 2.90E-01             | 3.40E-02             |                                                                                   | 1.55E-01                                                                         |
| Catal. Today 55 (2000) 269–280   | FBR     | 873   | gas   | O <sub>2</sub> | FePO <sub>4</sub> /ZrO <sub>2</sub>                                 |                        | 7.00E-02              | 5.50E-01 | 3.70E-01             | 3.90E-02             |                                                                                   | 1.13E-01                                                                         |
| Catal. Today 55 (2000) 269–280   | FBR     | 873   | gas   | O <sub>2</sub> | FePO <sub>4</sub> /ZrO <sub>2</sub>                                 |                        | 6.00E-02              | 5.30E-01 | 3.80E-01             | 3.60E-02             |                                                                                   | 8.95E-02                                                                         |
| Catal. Today 55 (2000) 269–280   | FBR     | 873   | gas   | O <sub>2</sub> | FePO <sub>4</sub> /TiO <sub>2</sub>                                 |                        | 4.00E-02              | 6.20E-01 | 3.40E-01             | 4.40E-02             |                                                                                   | 7.29E-02                                                                         |
| Catal. Today 55 (2000) 269–280   | FBR     | 873   | gas   | O <sub>2</sub> | FePO <sub>4</sub> /TiO <sub>2</sub>                                 |                        | 3.00E-02              | 5.80E-01 | 3.90E-01             | 4.80E-02             |                                                                                   | 5.97E-02                                                                         |
| Catal. Today 55 (2000) 269–280   | FBR     | 873   | gas   | O <sub>2</sub> | FePO <sub>4</sub> /TiO <sub>2</sub>                                 |                        | 2.00E-02              | 5.40E-01 | 4.40E-01             | 3.80E-02             |                                                                                   | 3.15E-02                                                                         |
| Catal. Today 55 (2000) 269–280   | FBR     | 873   | gas   | O <sub>2</sub> | FePO <sub>4</sub> /SiO <sub>2</sub>                                 | 2.00E-02               | 8.80E-01              | 9.00E-02 | 1.00E-02             | 1.60E-02             | 1.41E-02                                                                          | 5.84E-01                                                                         |
| Catal. Today 55 (2000) 269–280   | FBR     | 873   | gas   | O <sub>2</sub> | FePO <sub>4</sub> /SiO <sub>2</sub>                                 | 1.00E-02               | 6.90E-01              | 2.50E-01 | 5.00E-02             | 1.70E-02             | 7.52E-03                                                                          | 4.86E-01                                                                         |
| Catal. Today 55 (2000) 269–280   | FBR     | 873   | gas   | O <sub>2</sub> | FePO <sub>4</sub> /SiO <sub>2</sub>                                 |                        | 3.40E-01              | 5.40E-01 | 1.20E-01             | 2.10E-02             |                                                                                   | 2.96E-01                                                                         |
| Appl. Catal.A 203 (2000) 81–90   | FBR     | 873   | gas   | O <sub>2</sub> | HZSM-5                                                              |                        | 0.00E+00              | 6.42E-01 | 3.58E-01             | 9.90E-02             |                                                                                   | 0.00E+00                                                                         |
| Appl. Catal.A 203 (2000) 81–90   | FBR     | 873   | gas   | O <sub>2</sub> | Mo/ZSM-5                                                            |                        | 4.60E-02              | 6.43E-01 | 3.11E-01             | 7.90E-02             |                                                                                   | 1.24E-02                                                                         |
| Appl. Catal.A 203 (2000) 81–90   | FBR     | 873   | gas   | O <sub>2</sub> | Mo/ZSM-5                                                            |                        | 4.50E-02              | 6.47E-01 | 3.08E-01             | 9.50E-02             |                                                                                   | 1.46E-02                                                                         |
| Appl. Catal.A 203 (2000) 81–90   | FBR     | 873   | gas   | O <sub>2</sub> | Mo/ZSM-5                                                            |                        | 3.40E-02              | 6.66E-01 | 3.00E-01             | 1.31E-01             |                                                                                   | 1.52E-02                                                                         |



**Table S2: Database with catalyst composition and their performance in methane oxidation to oxygenates under different reaction conditions.**

| Reference                        | Reactor | T / K | Phase | Oxidant        | Catalyst                           | S (CH <sub>3</sub> OH) | S (CH <sub>2</sub> O) | S (CO)   | S (CO <sub>2</sub> ) | X (CH <sub>4</sub> ) | STY (CH <sub>3</sub> OH)<br>[kg kg <sub>Cat</sub> <sup>-1</sup> h <sup>-1</sup> ] | STY (CH <sub>2</sub> O)<br>[kg kg <sub>Cat</sub> <sup>-1</sup> h <sup>-1</sup> ] |
|----------------------------------|---------|-------|-------|----------------|------------------------------------|------------------------|-----------------------|----------|----------------------|----------------------|-----------------------------------------------------------------------------------|----------------------------------------------------------------------------------|
| Appl. Catal.A 203 (2000) 81–90   | FBR     | 873   | gas   | O <sub>2</sub> | Mo/ZSM-5                           |                        | 3.30E-02              | 6.08E-01 | 3.59E-01             | 1.11E-01             |                                                                                   | 1.25E-02                                                                         |
| Appl. Catal.A 203 (2000) 81–90   | FBR     | 873   | gas   | O <sub>2</sub> | Mo/ZSM-5                           |                        | 3.50E-02              | 5.42E-01 | 4.23E-01             | 1.06E-01             |                                                                                   | 1.26E-02                                                                         |
| Appl. Catal.A 203 (2000) 81–90   | FBR     | 873   | gas   | O <sub>2</sub> | Mo/ZSM-5                           |                        | 1.40E-02              | 7.75E-01 | 2.11E-01             | 7.90E-02             |                                                                                   | 3.77E-03                                                                         |
| Appl. Catal.A 203 (2000) 81–90   | FBR     | 873   | gas   | O <sub>2</sub> | Mo/ZSM-5                           |                        | 2.60E-02              | 7.15E-01 | 2.69E-01             | 6.20E-02             |                                                                                   | 5.50E-03                                                                         |
| Appl. Catal.A 203 (2000) 81–90   | FBR     | 873   | gas   | O <sub>2</sub> | Mo/ZSM-5                           |                        | 1.04E-01              | 5.93E-01 | 3.03E-01             | 5.80E-02             |                                                                                   | 2.06E-02                                                                         |
| Appl. Catal.A 203 (2000) 81–90   | FBR     | 873   | gas   | O <sub>2</sub> | Mo/ZSM-5                           |                        | 1.06E-01              | 5.69E-01 | 3.25E-01             | 6.50E-02             |                                                                                   | 2.35E-02                                                                         |
| Appl. Catal.A 203 (2000) 81–90   | FBR     | 873   | gas   | O <sub>2</sub> | Mo/ZSM-5                           |                        | 9.30E-02              | 5.27E-01 | 3.80E-01             | 6.30E-02             |                                                                                   | 2.00E-02                                                                         |
| Appl. Catal.A 203 (2000) 81–90   | FBR     | 873   | gas   | O <sub>2</sub> | Mo/ZSM-5                           |                        | 8.90E-02              | 5.11E-01 | 4.00E-01             | 6.50E-02             |                                                                                   | 1.97E-02                                                                         |
| Appl. Catal.A 193 (2000) 139–146 | FBR     | 923   | gas   | O <sub>2</sub> | MoO <sub>x</sub> /HZSM-5           | 0.00E+00               | 1.48E-01              | 5.51E-01 | 3.01E-01             | 1.21E-01             |                                                                                   | 6.11E-02                                                                         |
| J. Catal. 191, 384–400 (2000)    | FBR     | 868   | gas   | O <sub>2</sub> | VO <sub>x</sub> /MCM-41            | 7.00E-03               | 2.84E-01              |          |                      | 3.00E-02             | 2.87E-02                                                                          | 1.09E+00                                                                         |
| J. Catal. 191, 384–400 (2000)    | FBR     | 897   | gas   | O <sub>2</sub> | VO <sub>x</sub> /MCM-41            | 4.00E-03               | 1.72E-01              |          |                      | 6.60E-02             | 3.61E-02                                                                          | 1.46E+00                                                                         |
| J. Catal. 191, 384–400 (2000)    | FBR     | 924   | gas   | O <sub>2</sub> | VO <sub>x</sub> /MCM-41            | 3.00E-03               | 1.23E-01              |          |                      | 9.30E-02             | 3.82E-02                                                                          | 1.47E+00                                                                         |
| J. Catal. 191, 384–400 (2000)    | FBR     | 868   | gas   | O <sub>2</sub> | VO <sub>x</sub> /MCM-41            | 6.00E-03               | 2.91E-01              |          |                      | 3.20E-02             | 2.63E-02                                                                          | 1.19E+00                                                                         |
| J. Catal. 191, 384–400 (2000)    | FBR     | 899   | gas   | O <sub>2</sub> | VO <sub>x</sub> /MCM-41            | 2.00E-03               | 2.20E-01              |          |                      | 5.40E-02             | 1.48E-02                                                                          | 1.52E+00                                                                         |
| J. Catal. 191, 384–400 (2000)    | FBR     | 906   | gas   | O <sub>2</sub> | VO <sub>x</sub> /MCM-41            | 2.00E-03               | 1.17E-01              |          |                      | 9.90E-02             | 2.71E-02                                                                          | 1.49E+00                                                                         |
| J. Catal. 191, 384–400 (2000)    | FBR     | 929   | gas   | O <sub>2</sub> | VO <sub>x</sub> /MCM-41            | 2.00E-03               | 8.40E-02              |          |                      | 1.10E-01             | 3.01E-02                                                                          | 1.19E+00                                                                         |
| J. Catal. 190, 118–127 (2000)    | FBR     | 923   | gas   | O <sub>2</sub> | MoO <sub>x</sub> /SiO <sub>2</sub> | 4.00E-02               | 1.10E-01              | 2.30E-01 | 6.20E-01             | 1.20E-01             | 8.23E-03                                                                          | 2.12E-02                                                                         |
| CHEM. COMMUN., 2002, 1184–1185   | FBR     | 873   | gas   | O <sub>2</sub> | VO <sub>x</sub> /SiO <sub>2</sub>  |                        | 3.29E-01              |          |                      | 1.33E-02             |                                                                                   | 3.29E-02                                                                         |
| CHEM. COMMUN., 2002, 1184–1185   | FBR     | 898   | gas   | O <sub>2</sub> | VO <sub>x</sub> /SiO <sub>2</sub>  |                        | 1.43E-01              |          |                      | 1.23E-01             |                                                                                   | 1.31E-01                                                                         |
| CHEM. COMMUN., 2002, 1184–1185   | FBR     | 923   | gas   | O <sub>2</sub> | VO <sub>x</sub> /SiO <sub>2</sub>  |                        | 3.67E-01              |          |                      | 2.87E-01             |                                                                                   | 7.89E-01                                                                         |
| CHEM. COMMUN., 2002, 1184–1185   | FBR     | 823   | gas   | O <sub>2</sub> | VO <sub>x</sub> /SiO <sub>2</sub>  |                        | 0.00E+00              |          |                      | 0.00E+00             |                                                                                   | 0.00E+00                                                                         |
| CHEM. COMMUN., 2002, 1184–1185   | FBR     | 873   | gas   | O <sub>2</sub> | VO <sub>x</sub> /SiO <sub>2</sub>  |                        | 5.71E-01              |          |                      | 6.15E-02             |                                                                                   | 2.96E-01                                                                         |
| CHEM. COMMUN., 2002, 1184–1185   | FBR     | 898   | gas   | O <sub>2</sub> | VO <sub>x</sub> /SiO <sub>2</sub>  |                        | 4.28E-01              |          |                      | 2.67E-01             |                                                                                   | 9.62E-01                                                                         |
| CHEM. COMMUN., 2002, 1184–1185   | FBR     | 923   | gas   | O <sub>2</sub> | VO <sub>x</sub> /SiO <sub>2</sub>  |                        | 4.55E-01              |          |                      | 3.28E-01             |                                                                                   | 1.26E+00                                                                         |
| CHEM. COMMUN., 2002, 1184–1185   | FBR     | 873   | gas   | O <sub>2</sub> | VO <sub>x</sub> /SiO <sub>2</sub>  |                        | 2.14E-01              |          |                      | 4.10E-02             |                                                                                   | 8.22E-02                                                                         |
| CHEM. COMMUN., 2002, 1184–1185   | FBR     | 898   | gas   | O <sub>2</sub> | VO <sub>x</sub> /SiO <sub>2</sub>  |                        | 4.00E-01              |          |                      | 3.08E-01             |                                                                                   | 1.15E+00                                                                         |
| CHEM. COMMUN., 2002, 1184–1185   | FBR     | 923   | gas   | O <sub>2</sub> | VO <sub>x</sub> /SiO <sub>2</sub>  |                        | 3.21E-01              |          |                      | 3.28E-01             |                                                                                   | 9.87E-01                                                                         |
| CHEM. COMMUN., 2002, 1184–1185   | FBR     | 873   | gas   | O <sub>2</sub> | VO <sub>x</sub> /SiO <sub>2</sub>  |                        | 4.14E-01              |          |                      | 3.08E-01             |                                                                                   | 1.31E+00                                                                         |
| CHEM. COMMUN., 2002, 1184–1185   | FBR     | 898   | gas   | O <sub>2</sub> | VO <sub>x</sub> /SiO <sub>2</sub>  |                        | 3.18E-01              |          |                      | 3.59E-01             |                                                                                   | 1.18E+00                                                                         |
| CHEM. COMMUN., 2002, 1184–1185   | FBR     | 923   | gas   | O <sub>2</sub> | VO <sub>x</sub> /SiO <sub>2</sub>  |                        | 2.38E-01              |          |                      | 3.59E-01             |                                                                                   | 8.82E-01                                                                         |
| CHEM. COMMUN., 2002, 1184–1185   | FBR     | 873   | gas   | O <sub>2</sub> | VO <sub>x</sub> /SiO <sub>2</sub>  |                        | 3.26E-01              |          |                      | 3.64E-01             |                                                                                   | 1.33E+00                                                                         |
| CHEM. COMMUN., 2002, 1184–1185   | FBR     | 898   | gas   | O <sub>2</sub> | VO <sub>x</sub> /SiO <sub>2</sub>  |                        | 2.41E-01              |          |                      | 4.00E-01             |                                                                                   | 1.09E+00                                                                         |
| CHEM. COMMUN., 2002, 1184–1185   | FBR     | 923   | gas   | O <sub>2</sub> | VO <sub>x</sub> /SiO <sub>2</sub>  |                        | 2.14E-01              |          |                      | 3.90E-01             |                                                                                   | 9.38E-01                                                                         |
| Appl. Catal.A 247 (2003) 321–333 | FBR     | 898   | gas   | O <sub>2</sub> | Q. Wool                            | 5.90E-02               | 7.94E-01              |          | 1.46E-01             | 5.00E-04             | 3.80E-03                                                                          | 4.79E-02                                                                         |
| Appl. Catal.A 247 (2003) 321–333 | FBR     | 898   | gas   | O <sub>2</sub> | SiO <sub>2</sub>                   | 7.80E-02               | 4.50E-01              | 3.54E-01 | 1.12E-01             | 3.00E-03             | 3.01E-02                                                                          | 1.63E-01                                                                         |
| Appl. Catal.A 247 (2003) 321–333 | FBR     | 898   | gas   | O <sub>2</sub> | VO <sub>x</sub> /SiO <sub>2</sub>  | 7.00E-03               | 4.90E-02              | 5.65E-01 | 1.68E-01             | 1.07E-01             | 9.64E-02                                                                          | 6.32E-01                                                                         |
| Appl. Catal.A 247 (2003) 321–333 | FBR     | 898   | gas   | O <sub>2</sub> | VO <sub>x</sub> /SiO <sub>2</sub>  | 6.70E-02               | 1.29E-01              | 4.58E-01 | 1.87E-01             | 3.06E-02             | 2.64E-01                                                                          | 4.76E-01                                                                         |
| Appl. Catal.A 247 (2003) 321–333 | FBR     | 898   | gas   | O <sub>2</sub> | VO <sub>x</sub> /SiO <sub>2</sub>  | 8.20E-02               | 2.58E-01              | 3.01E-01 | 1.59E-01             | 1.91E-02             | 2.02E-01                                                                          | 5.94E-01                                                                         |
| Appl. Catal.A 247 (2003) 321–333 | FBR     | 898   | gas   | O <sub>2</sub> | VO <sub>x</sub> /SiO <sub>2</sub>  | 2.30E-02               | 1.70E-01              | 7.40E-02 | 4.99E-01             | 2.07E-02             | 6.13E-02                                                                          | 4.24E-01                                                                         |
| Appl. Catal.A 247 (2003) 321–333 | FBR     | 898   | gas   | O <sub>2</sub> | VO <sub>x</sub> /SiO <sub>2</sub>  | 4.70E-02               | 3.22E-01              | 3.30E-02 | 4.76E-01             | 1.50E-02             | 9.07E-02                                                                          | 5.82E-01                                                                         |

**Table S2: Database with catalyst composition and their performance in methane oxidation to oxygenates under different reaction conditions.**

| Reference                         | Reactor | T / K | Phase | Oxidant        | Catalyst                          | S (CH <sub>3</sub> OH) | S (CH <sub>2</sub> O) | S (CO)   | S (CO <sub>2</sub> ) | X (CH <sub>4</sub> ) | STY (CH <sub>3</sub> OH)<br>[kg kg <sub>Cat</sub> <sup>-1</sup> h <sup>-1</sup> ] | STY (CH <sub>2</sub> O)<br>[kg kg <sub>Cat</sub> <sup>-1</sup> h <sup>-1</sup> ] |
|-----------------------------------|---------|-------|-------|----------------|-----------------------------------|------------------------|-----------------------|----------|----------------------|----------------------|-----------------------------------------------------------------------------------|----------------------------------------------------------------------------------|
| Appl. Catal.A 247 (2003) 321–333  | FBR     | 898   | gas   | O <sub>2</sub> | VO <sub>x</sub> /SiO <sub>2</sub> | 2.00E-03               | 7.60E-02              | 0.00E+00 | 9.22E-01             | 2.20E-02             | 5.66E-03                                                                          | 2.02E-01                                                                         |
| Appl. Catal.A 247 (2003) 321–333  | FBR     | 898   | gas   | O <sub>2</sub> | VO <sub>x</sub> /SiO <sub>2</sub> | 1.00E-03               | 6.60E-02              | 0.00E+00 | 9.33E-01             | 2.30E-02             | 2.96E-03                                                                          | 1.83E-01                                                                         |
| Appl. Catal.A 247 (2003) 321–333  | FBR     | 823   | gas   | O <sub>2</sub> | VO <sub>x</sub> /SiO <sub>2</sub> | 1.97E-01               | 5.60E-01              | 0.00E+00 | 2.43E-01             | 3.10E-03             | 7.86E-02                                                                          | 1.92E-01                                                                         |
| Appl. Catal.A 247 (2003) 321–333  | FBR     | 848   | gas   | O <sub>2</sub> | VO <sub>x</sub> /SiO <sub>2</sub> | 1.96E-01               | 2.74E-01              | 0.00E+00 | 3.25E-01             | 1.10E-02             | 2.78E-01                                                                          | 3.33E-01                                                                         |
| Appl. Catal.A 247 (2003) 321–333  | FBR     | 873   | gas   | O <sub>2</sub> | VO <sub>x</sub> /SiO <sub>2</sub> | 7.20E-02               | 1.26E-01              | 3.60E-01 | 2.36E-01             | 2.00E-02             | 1.85E-01                                                                          | 2.78E-01                                                                         |
| Appl. Catal.A 247 (2003) 321–333  | FBR     | 923   | gas   | O <sub>2</sub> | VO <sub>x</sub> /SiO <sub>2</sub> | 4.30E-02               | 7.10E-02              | 6.30E-01 | 1.41E-01             | 4.87E-02             | 2.70E-01                                                                          | 3.82E-01                                                                         |
| Appl. Catal.A 249 (2003) 345–354  | FBR     | 873   | gas   | O <sub>2</sub> | VO <sub>x</sub> /SBA-15           | 2.00E-03               | 2.97E-01              | 6.55E-01 | 4.60E-02             | 3.13E-02             | 2.79E-03                                                                          | 3.89E-01                                                                         |
| Appl. Catal.A 249 (2003) 345–354  | FBR     | 873   | gas   | O <sub>2</sub> | VO <sub>x</sub> /SBA-15           | 2.00E-03               | 4.73E-01              | 4.81E-01 | 4.40E-02             | 1.42E-02             | 2.06E-03                                                                          | 4.57E-01                                                                         |
| Appl. Catal.A 249 (2003) 345–354  | FBR     | 873   | gas   | O <sub>2</sub> | VO <sub>x</sub> /SBA-15           | 4.00E-03               | 5.54E-01              | 4.00E-01 | 4.20E-02             | 9.10E-03             | 3.62E-03                                                                          | 4.70E-01                                                                         |
| Appl. Catal.A 249 (2003) 345–354  | FBR     | 873   | gas   | O <sub>2</sub> | VO <sub>x</sub> /SBA-15           | 4.00E-03               | 3.64E-01              | 5.87E-01 | 4.50E-02             | 1.81E-02             | 1.37E-02                                                                          | 1.17E+00                                                                         |
| Appl. Catal.A 249 (2003) 345–354  | FBR     | 873   | gas   | O <sub>2</sub> | VO <sub>x</sub> /SBA-15           | 5.00E-03               | 4.82E-01              | 4.76E-01 | 3.70E-02             | 1.17E-02             | 1.67E-02                                                                          | 1.51E+00                                                                         |
| Appl. Catal.A 249 (2003) 345–354  | FBR     | 873   | gas   | O <sub>2</sub> | VO <sub>x</sub> /SBA-15           | 8.00E-03               | 6.33E-01              | 3.26E-01 | 3.30E-02             | 5.80E-03             | 2.21E-02                                                                          | 1.64E+00                                                                         |
| Catal. Today 93–95 (2004) 155–161 | FBR     | 773   | gas   | O <sub>2</sub> | FePO <sub>4</sub>                 |                        | 4.62E-01              |          |                      | 3.20E-03             |                                                                                   | 4.76E-03                                                                         |
| Catal. Today 93–95 (2004) 155–161 | FBR     | 823   | gas   | O <sub>2</sub> | FePO <sub>4</sub>                 |                        | 3.97E-01              |          |                      | 9.10E-03             |                                                                                   | 1.16E-02                                                                         |
| Catal. Today 93–95 (2004) 155–161 | FBR     | 873   | gas   | O <sub>2</sub> | FePO <sub>4</sub>                 |                        | 2.64E-01              |          |                      | 2.47E-02             |                                                                                   | 2.10E-02                                                                         |
| Catal. Today 93–95 (2004) 155–161 | FBR     | 773   | gas   | O <sub>2</sub> | FePO <sub>4</sub> /SBA-15         |                        | 8.13E-01              |          |                      | 5.60E-03             |                                                                                   | 3.66E-02                                                                         |
| Catal. Today 93–95 (2004) 155–161 | FBR     | 823   | gas   | O <sub>2</sub> | FePO <sub>4</sub> /SBA-15         |                        | 7.28E-01              |          |                      | 1.16E-02             |                                                                                   | 6.79E-02                                                                         |
| Catal. Today 93–95 (2004) 155–161 | FBR     | 873   | gas   | O <sub>2</sub> | FePO <sub>4</sub> /SBA-15         |                        | 4.90E-01              |          |                      | 2.73E-02             |                                                                                   | 1.08E-01                                                                         |
| Catal. Today 93–95 (2004) 155–161 | FBR     | 773   | gas   | O <sub>2</sub> | FePO <sub>4</sub> /SBA-15         |                        | 7.51E-01              |          |                      | 6.70E-03             |                                                                                   | 4.05E-02                                                                         |
| Catal. Today 93–95 (2004) 155–161 | FBR     | 823   | gas   | O <sub>2</sub> | FePO <sub>4</sub> /SBA-15         |                        | 6.31E-01              |          |                      | 1.37E-02             |                                                                                   | 6.95E-02                                                                         |
| Catal. Today 93–95 (2004) 155–161 | FBR     | 873   | gas   | O <sub>2</sub> | FePO <sub>4</sub> /SBA-15         |                        | 3.88E-01              |          |                      | 3.39E-02             |                                                                                   | 1.06E-01                                                                         |
| Catal. Today 93–95 (2004) 155–161 | FBR     | 773   | gas   | O <sub>2</sub> | FePO <sub>4</sub> /SBA-15         |                        | 7.61E-01              |          |                      | 6.80E-03             |                                                                                   | 4.16E-02                                                                         |
| Catal. Today 93–95 (2004) 155–161 | FBR     | 823   | gas   | O <sub>2</sub> | FePO <sub>4</sub> /SBA-15         |                        | 6.14E-01              |          |                      | 1.44E-02             |                                                                                   | 7.11E-02                                                                         |
| Catal. Today 93–95 (2004) 155–161 | FBR     | 873   | gas   | O <sub>2</sub> | FePO <sub>4</sub> /SBA-15         |                        | 3.60E-01              |          |                      | 3.30E-02             |                                                                                   | 9.56E-02                                                                         |
| Catal. Today 93–95 (2004) 155–161 | FBR     | 773   | gas   | O <sub>2</sub> | FePO <sub>4</sub> /SBA-15         |                        | 7.42E-01              |          |                      | 7.30E-03             |                                                                                   | 4.36E-02                                                                         |
| Catal. Today 93–95 (2004) 155–161 | FBR     | 823   | gas   | O <sub>2</sub> | FePO <sub>4</sub> /SBA-15         |                        | 6.10E-01              |          |                      | 1.34E-02             |                                                                                   | 6.58E-02                                                                         |
| Catal. Today 93–95 (2004) 155–161 | FBR     | 873   | gas   | O <sub>2</sub> | FePO <sub>4</sub> /SBA-15         |                        | 3.33E-01              |          |                      | 3.33E-02             |                                                                                   | 8.92E-02                                                                         |
| Catal. Today 93–95 (2004) 155–161 | FBR     | 773   | gas   | O <sub>2</sub> | FePO <sub>4</sub> /SBA-15         |                        | 6.88E-01              |          |                      | 6.10E-03             |                                                                                   | 3.38E-02                                                                         |
| Catal. Today 93–95 (2004) 155–161 | FBR     | 823   | gas   | O <sub>2</sub> | FePO <sub>4</sub> /SBA-15         |                        | 5.03E-01              |          |                      | 1.34E-02             |                                                                                   | 5.42E-02                                                                         |
| Catal. Today 93–95 (2004) 155–161 | FBR     | 873   | gas   | O <sub>2</sub> | FePO <sub>4</sub> /SBA-15         |                        | 2.72E-01              |          |                      | 3.43E-02             |                                                                                   | 7.51E-02                                                                         |
| Catal. Today 93–95 (2004) 155–161 | FBR     | 773   | gas   | O <sub>2</sub> | FePO <sub>4</sub> /MCM-41         |                        | 6.72E-01              |          |                      | 5.40E-03             |                                                                                   | 2.92E-02                                                                         |
| Catal. Today 93–95 (2004) 155–161 | FBR     | 823   | gas   | O <sub>2</sub> | FePO <sub>4</sub> /MCM-41         |                        | 4.27E-01              |          |                      | 1.53E-02             |                                                                                   | 5.26E-02                                                                         |
| Catal. Today 93–95 (2004) 155–161 | FBR     | 873   | gas   | O <sub>2</sub> | FePO <sub>4</sub> /MCM-41         |                        | 2.93E-01              |          |                      | 3.24E-02             |                                                                                   | 7.64E-02                                                                         |
| Catal. Today 93–95 (2004) 155–161 | FBR     | 773   | gas   | O <sub>2</sub> | SBA-15                            |                        | 2.49E-01              |          |                      | 2.30E-04             |                                                                                   | 4.61E-04                                                                         |
| Catal. Today 93–95 (2004) 155–161 | FBR     | 823   | gas   | O <sub>2</sub> | SBA-15                            |                        | 4.43E-01              |          |                      | 8.20E-04             |                                                                                   | 2.92E-03                                                                         |
| Catal. Today 93–95 (2004) 155–161 | FBR     | 873   | gas   | O <sub>2</sub> | SBA-15                            |                        | 6.02E-01              |          |                      | 2.30E-03             |                                                                                   | 1.11E-02                                                                         |
| J. Catal. 231 (2005) 365–380      | RBR     | 923   | gas   | O <sub>2</sub> | SiO <sub>2</sub>                  |                        | 7.50E-01              | 1.60E-01 | 6.00E-02             | 3.80E-02             |                                                                                   | 3.08E-01                                                                         |
| J. Catal. 231 (2005) 365–380      | RBR     | 923   | gas   | O <sub>2</sub> | SiO <sub>2</sub>                  |                        | 6.60E-01              | 2.60E-01 | 8.00E-02             | 2.70E-02             |                                                                                   | 1.93E-01                                                                         |
| J. Catal. 231 (2005) 365–380      | RBR     | 923   | gas   | O <sub>2</sub> | FeOx/SiO <sub>2</sub>             |                        | 5.50E-01              | 2.80E-01 | 1.70E-01             | 8.60E-02             |                                                                                   | 5.25E-01                                                                         |
| J. Catal. 231 (2005) 365–380      | RBR     | 923   | gas   | O <sub>2</sub> | FeOx/SiO <sub>2</sub>             |                        | 5.40E-01              | 2.70E-01 | 1.90E-01             | 9.90E-02             |                                                                                   | 5.80E-01                                                                         |

**Table S2: Database with catalyst composition and their performance in methane oxidation to oxygenates under different reaction conditions.**

| Reference                             | Reactor | T / K | Phase | Oxidant          | Catalyst                                                              | S (CH <sub>3</sub> OH) | S (CH <sub>2</sub> O) | S (CO)   | S (CO <sub>2</sub> ) | X (CH <sub>4</sub> ) | STY (CH <sub>3</sub> OH)<br>[kg kg <sub>Cat</sub> <sup>-1</sup> h <sup>-1</sup> ] | STY (CH <sub>2</sub> O)<br>[kg kg <sub>Cat</sub> <sup>-1</sup> h <sup>-1</sup> ] |
|---------------------------------------|---------|-------|-------|------------------|-----------------------------------------------------------------------|------------------------|-----------------------|----------|----------------------|----------------------|-----------------------------------------------------------------------------------|----------------------------------------------------------------------------------|
| J. Catal. 231 (2005) 365–380          | RBR     | 923   | gas   | O <sub>2</sub>   | FeOx/SiO <sub>2</sub>                                                 |                        | 4.70E-01              | 2.20E-01 | 3.10E-01             | 7.80E-02             |                                                                                   | 4.05E-01                                                                         |
| J. Catal. 231 (2005) 365–380          | RBR     | 923   | gas   | O <sub>2</sub>   | FeOx/SiO <sub>2</sub>                                                 |                        | 3.30E-01              | 2.90E-01 | 3.80E-01             | 3.72E-01             |                                                                                   | 1.35E+00                                                                         |
| J. Catal. 231 (2005) 365–380          | RBR     | 923   | gas   | O <sub>2</sub>   | FeOx/SiO <sub>2</sub>                                                 |                        | 6.30E-01              | 2.50E-01 | 1.20E-01             | 1.46E-01             |                                                                                   | 1.02E+00                                                                         |
| J. Catal. 231 (2005) 365–380          | RBR     | 923   | gas   | O <sub>2</sub>   | FeOx/SiO <sub>2</sub>                                                 |                        | 3.60E-01              | 3.70E-01 | 2.70E-01             | 3.42E-01             |                                                                                   | 1.36E+00                                                                         |
| J. Catal. 231 (2005) 365–380          | RBR     | 923   | gas   | O <sub>2</sub>   | FeOx/SiO <sub>2</sub>                                                 |                        | 5.50E-01              | 2.30E-01 | 2.20E-01             | 4.60E-02             |                                                                                   | 2.80E+00                                                                         |
| J. Catal. 231 (2005) 365–380          | RBR     | 923   | gas   | O <sub>2</sub>   | FeOx/SiO <sub>2</sub>                                                 |                        | 5.40E-01              | 2.30E-01 | 2.30E-01             | 4.80E-02             |                                                                                   | 2.87E+00                                                                         |
| J. Catal. 238 (2006) 277–285          | FBR     | 873   | gas   | O <sub>2</sub>   | VO <sub>x</sub> /SBA-15                                               |                        | 1.58E-01              | 0.00E+00 | 0.00E+00             | 1.52E-01             |                                                                                   | 2.27E-01                                                                         |
| J. Catal. 238 (2006) 277–285          | FBR     | 873   | gas   | O <sub>2</sub>   | VO <sub>x</sub> /SBA-15                                               |                        | 2.00E-01              | 0.00E+00 | 0.00E+00             | 7.10E-02             |                                                                                   | 6.08E-01                                                                         |
| J. Catal. 238 (2006) 277–285          | FBR     | 873   | gas   | O <sub>2</sub>   | VO <sub>x</sub> /SBA-15                                               |                        | 1.40E-01              | 0.00E+00 | 0.00E+00             | 3.10E-02             |                                                                                   | 4.11E-02                                                                         |
| J. Catal. 238 (2006) 277–285          | FBR     | 873   | gas   | O <sub>2</sub>   | VO <sub>x</sub> /SBA-15                                               |                        | 2.14E-01              | 0.00E+00 | 0.00E+00             | 2.50E-02             |                                                                                   | 2.29E-01                                                                         |
| J. Catal. 238 (2006) 277–285          | FBR     | 873   | gas   | O <sub>2</sub>   | MoO <sub>x</sub> /SiO <sub>2</sub>                                    |                        | 4.80E-01              | 3.80E-01 | 1.40E-01             | 2.50E-02             |                                                                                   | 3.10E-02                                                                         |
| J. Catal. 238 (2006) 277–285          | FBR     | 873   | gas   | O <sub>2</sub>   | MoO <sub>x</sub> /SiO <sub>2</sub>                                    |                        | 4.20E-01              | 4.60E-01 | 1.10E-01             | 2.50E-02             |                                                                                   | 2.58E-02                                                                         |
| J. Catal. 238 (2006) 277–285          | FBR     | 873   | gas   | O <sub>2</sub>   | MoO <sub>x</sub> /SiO <sub>2</sub>                                    |                        | 4.10E-01              | 4.80E-01 | 1.00E-01             | 2.50E-02             |                                                                                   | 2.65E-02                                                                         |
| J. Catal. 238 (2006) 277–285          | FBR     | 873   | gas   | O <sub>2</sub>   | MoO <sub>x</sub> /SiO <sub>2</sub>                                    |                        | 4.00E-01              | 4.90E-01 | 1.00E-01             | 2.50E-02             |                                                                                   | 2.46E-02                                                                         |
| J. Catal. 238 (2006) 277–285          | FBR     | 873   | gas   | O <sub>2</sub>   | MoO <sub>x</sub> /SiO <sub>2</sub>                                    |                        | 4.50E-01              | 4.40E-01 | 1.10E-01             | 2.50E-02             |                                                                                   | 1.08E-01                                                                         |
| J. Catal. 238 (2006) 277–285          | FBR     | 873   | gas   | O <sub>2</sub>   | MoO <sub>x</sub> /SiO <sub>2</sub>                                    |                        | 4.00E-01              | 5.20E-01 | 8.00E-02             | 2.50E-02             |                                                                                   | 9.60E-02                                                                         |
| Chemistry Letters Vol.35, No.6 (2006) | FBR     | 898   | gas   | O <sub>2</sub>   | CuO/SBA-15                                                            |                        | 4.20E-01              | 4.50E-01 | 1.30E-01             | 3.80E-02             |                                                                                   | 5.14E-01                                                                         |
| J. Catal. 237 (2006) 38–48            | FBR     | 825   | gas   | O <sub>2</sub>   | VO <sub>x</sub> /SiO <sub>2</sub>                                     | 2.00E-02               | 8.22E-01              | 1.49E-01 | 9.00E-03             | 2.30E-02             | 2.00E-02                                                                          | 7.70E-01                                                                         |
| J. Catal. 237 (2006) 38–48            | FBR     | 858   | gas   | O <sub>2</sub>   | VO <sub>x</sub> /SiO <sub>2</sub>                                     | 7.00E-03               | 4.89E-01              | 4.82E-01 | 2.20E-02             | 7.70E-02             | 2.34E-02                                                                          | 1.53E+00                                                                         |
| J. Catal. 237 (2006) 38–48            | FBR     | 822   | gas   | O <sub>2</sub>   | VO <sub>x</sub> /SiO <sub>2</sub>                                     | 6.00E-02               | 9.19E-01              | 1.40E-02 | 7.00E-03             | 9.00E-03             | 5.43E-02                                                                          | 7.79E-01                                                                         |
| J. Catal. 237 (2006) 38–48            | FBR     | 854   | gas   | O <sub>2</sub>   | VO <sub>x</sub> /SiO <sub>2</sub>                                     | 1.80E-02               | 7.42E-01              | 2.31E-01 | 1.00E-02             | 3.50E-02             | 6.33E-02                                                                          | 2.45E+00                                                                         |
| J. Catal. 237 (2006) 38–48            | FBR     | 873   | gas   | O <sub>2</sub>   | VO <sub>x</sub> /SiO <sub>2</sub>                                     | 1.10E-02               | 5.75E-01              | 3.99E-01 | 1.40E-02             | 6.30E-02             | 6.96E-02                                                                          | 3.41E+00                                                                         |
| J. Catal. 237 (2006) 38–48            | FBR     | 825   | gas   | O <sub>2</sub>   | VO <sub>x</sub> /SiO <sub>2</sub>                                     | 1.07E-01               | 8.61E-01              | 0.00E+00 | 3.20E-02             | 2.00E-03             | 6.34E-02                                                                          | 4.78E-01                                                                         |
| J. Catal. 237 (2006) 38–48            | FBR     | 851   | gas   | O <sub>2</sub>   | VO <sub>x</sub> /SiO <sub>2</sub>                                     | 6.20E-02               | 9.04E-01              | 2.90E-02 | 5.00E-03             | 9.00E-03             | 1.65E-01                                                                          | 2.26E+00                                                                         |
| J. Catal. 237 (2006) 38–48            | FBR     | 871   | gas   | O <sub>2</sub>   | VO <sub>x</sub> /SiO <sub>2</sub>                                     | 3.40E-02               | 8.01E-01              | 1.55E-01 | 9.00E-03             | 2.10E-02             | 2.11E-01                                                                          | 4.67E+00                                                                         |
| J. Catal. 237 (2006) 38–48            | FBR     | 823   | gas   | O <sub>2</sub>   | VO <sub>x</sub> /SiO <sub>2</sub>                                     | 7.00E-02               | 8.93E-01              | 0.00E+00 | 3.70E-02             | 1.00E-03             | 2.81E-02                                                                          | 3.36E-01                                                                         |
| J. Catal. 237 (2006) 38–48            | FBR     | 852   | gas   | O <sub>2</sub>   | VO <sub>x</sub> /SiO <sub>2</sub>                                     | 5.50E-02               | 9.35E-01              | 0.00E+00 | 1.00E-02             | 8.00E-03             | 1.77E-01                                                                          | 2.82E+00                                                                         |
| J. Catal. 237 (2006) 38–48            | FBR     | 873   | gas   | O <sub>2</sub>   | VO <sub>x</sub> /SiO <sub>2</sub>                                     | 3.40E-02               | 9.33E-01              | 2.30E-02 | 9.00E-03             | 1.90E-02             | 2.60E-01                                                                          | 6.68E+00                                                                         |
| J. Catal. 237 (2006) 38–48            | FBR     | 868   | gas   | O <sub>2</sub>   | VO <sub>x</sub> /MCM-41                                               | 6.00E-03               | 2.76E-01              | 6.61E-01 | 5.30E-02             | 3.10E-02             | 2.56E-02                                                                          | 1.10E+00                                                                         |
| J. Catal. 237 (2006) 38–48            | FBR     | 853   | gas   | O <sub>2</sub>   | VO <sub>x</sub> /MCM-41                                               | 5.00E-03               | 4.19E-01              | 5.40E-01 | 3.60E-02             | 5.80E-02             | 1.26E-02                                                                          | 9.90E-01                                                                         |
| J. Natur. Gas Chem. 17(2008)309–312   | FBR     | 973   | gas   | O <sub>2</sub>   | H <sub>4</sub> PMo <sub>11</sub> VO <sub>40</sub>                     | 1.99E-01               | 7.28E-02              | 4.35E-01 | 4.09E-01             | 3.00E-02             | 6.09E-02                                                                          | 2.09E-02                                                                         |
| J. Natur. Gas Chem. 17(2008)309–312   | FBR     | 1023  | gas   | O <sub>2</sub>   | H <sub>4</sub> PMo <sub>11</sub> VO <sub>40</sub>                     | 1.23E-01               | 1.56E-01              | 4.59E-01 | 4.50E-01             | 1.30E-01             | 1.63E-01                                                                          | 1.95E-01                                                                         |
| J. Natur. Gas Chem. 17(2008)309–312   | FBR     | 973   | gas   | O <sub>2</sub>   | (NH <sub>4</sub> ) <sub>4</sub> PMo <sub>11</sub> FeO <sub>39</sub>   | 2.37E-01               | 1.29E-01              | 4.35E-01 | 1.99E-01             | 4.00E-02             | 9.67E-02                                                                          | 4.95E-02                                                                         |
| J. Natur. Gas Chem. 17(2008)309–312   | FBR     | 1023  | gas   | O <sub>2</sub>   | (NH <sub>4</sub> ) <sub>4</sub> PMo <sub>11</sub> FeO <sub>39</sub>   | 1.06E-01               | 2.61E-01              | 4.59E-01 | 1.74E-01             | 2.30E-01             | 2.50E-01                                                                          | 5.74E-01                                                                         |
| J. Natur. Gas Chem. 17(2008)309–312   | FBR     | 973   | gas   | O <sub>2</sub>   | (NH <sub>4</sub> ) <sub>6</sub> HSiMo <sub>11</sub> FeO <sub>40</sub> | 2.15E-01               | 8.23E-02              | 2.32E-01 | 4.71E-01             | 4.00E-02             | 8.76E-02                                                                          | 3.15E-02                                                                         |
| J. Natur. Gas Chem. 17(2008)309–312   | FBR     | 1023  | gas   | O <sub>2</sub>   | (NH <sub>4</sub> ) <sub>6</sub> HSiMo <sub>11</sub> FeO <sub>40</sub> | 7.85E-02               | 2.05E-01              | 2.79E-01 | 4.38E-01             | 3.20E-01             | 2.56E-01                                                                          | 6.27E-01                                                                         |
| J. Natur. Gas Chem. 17(2008)309–312   | FBR     | 973   | gas   | N <sub>2</sub> O | H <sub>4</sub> PMo <sub>11</sub> VO <sub>40</sub>                     | 2.27E-01               | 0.00E+00              | 0.00E+00 | 7.73E-01             | 2.00E-02             | 4.64E-02                                                                          | 0.00E+00                                                                         |
| J. Natur. Gas Chem. 17(2008)309–312   | FBR     | 1023  | gas   | N <sub>2</sub> O | H <sub>4</sub> PMo <sub>11</sub> VO <sub>40</sub>                     | 1.67E-01               | 5.45E-02              | 1.56E-01 | 6.23E-01             | 6.00E-02             | 1.02E-01                                                                          | 3.13E-02                                                                         |
| J. Natur. Gas Chem. 17(2008)309–312   | FBR     | 973   | gas   | N <sub>2</sub> O | (NH <sub>4</sub> ) <sub>4</sub> PMo <sub>11</sub> FeO <sub>39</sub>   | 3.13E-01               | 0.00E+00              | 1.64E-01 | 5.22E-01             | 2.00E-02             | 6.40E-02                                                                          | 0.00E+00                                                                         |
| J. Natur. Gas Chem. 17(2008)309–312   | FBR     | 1023  | gas   | N <sub>2</sub> O | (NH <sub>4</sub> ) <sub>4</sub> PMo <sub>11</sub> FeO <sub>39</sub>   | 2.21E-01               | 1.37E-01              | 4.33E-01 | 2.09E-01             | 8.00E-02             | 1.81E-01                                                                          | 1.05E-01                                                                         |

**Table S2: Database with catalyst composition and their performance in methane oxidation to oxygenates under different reaction conditions.**

| Reference                           | Reactor | T / K | Phase | Oxidant          | Catalyst                                                              | S (CH <sub>3</sub> OH) | S (CH <sub>2</sub> O) | S (CO)   | S (CO <sub>2</sub> ) | X (CH <sub>4</sub> ) | STY (CH <sub>3</sub> OH)<br>[kg kg <sub>Cat</sub> <sup>-1</sup> h <sup>-1</sup> ] | STY (CH <sub>2</sub> O)<br>[kg kg <sub>Cat</sub> <sup>-1</sup> h <sup>-1</sup> ] |
|-------------------------------------|---------|-------|-------|------------------|-----------------------------------------------------------------------|------------------------|-----------------------|----------|----------------------|----------------------|-----------------------------------------------------------------------------------|----------------------------------------------------------------------------------|
| J. Natur. Gas Chem. 17(2008)309–312 | FBR     | 973   | gas   | N <sub>2</sub> O | (NH <sub>4</sub> ) <sub>6</sub> HSiMo <sub>11</sub> FeO <sub>40</sub> | 2.26E-01               | 1.03E-01              | 4.64E-01 | 2.08E-01             | 6.00E-02             | 1.38E-01                                                                          | 5.91E-02                                                                         |
| J. Natur. Gas Chem. 17(2008)309–312 | FBR     | 1023  | gas   | N <sub>2</sub> O | (NH <sub>4</sub> ) <sub>6</sub> HSiMo <sub>11</sub> FeO <sub>40</sub> | 1.59E-01               | 2.11E-01              | 4.33E-01 | 1.98E-01             | 1.30E-01             | 2.11E-01                                                                          | 2.62E-01                                                                         |
| Appl. Catal.A 350 (2008) 118–125    | FBR     | 873   | gas   | O <sub>2</sub>   | MoO <sub>x</sub> /SBA-15                                              |                        | 7.00E-01              | 2.80E-01 | 2.30E-02             | 1.90E-02             |                                                                                   | 8.01E-02                                                                         |
| Appl. Catal.A 350 (2008) 118–125    | FBR     | 873   | gas   | O <sub>2</sub>   | VO <sub>x</sub> /SBA-15                                               |                        | 4.40E-01              | 4.30E-01 | 1.20E-01             | 2.40E-02             |                                                                                   | 6.36E-02                                                                         |
| Appl. Catal.A 350 (2008) 118–125    | FBR     | 873   | gas   | O <sub>2</sub>   | MoO <sub>x</sub> +VO <sub>x</sub> /SBA-15                             |                        | 6.40E-01              | 3.40E-01 | 1.60E-02             | 1.50E-02             |                                                                                   | 5.78E-02                                                                         |
| Appl. Catal.A 350 (2008) 118–125    | FBR     | 873   | gas   | O <sub>2</sub>   | MoO <sub>x</sub> +VO <sub>x</sub> /SBA-15                             |                        | 6.30E-01              | 3.50E-01 | 2.00E-02             | 1.20E-02             |                                                                                   | 4.55E-02                                                                         |
| Appl. Catal.A 350 (2008) 118–125    | FBR     | 873   | gas   | O <sub>2</sub>   | VO <sub>x</sub> /SBA-15                                               |                        | 2.10E-01              | 7.10E-01 | 8.30E-02             | 1.10E-01             |                                                                                   | 1.39E-01                                                                         |
| Appl. Catal.A 350 (2008) 118–125    | FBR     | 873   | gas   | O <sub>2</sub>   | MoO <sub>x</sub> +VO <sub>x</sub> /SBA-15                             |                        | 2.30E-01              | 7.30E-01 | 3.80E-02             | 3.80E-02             |                                                                                   | 5.26E-02                                                                         |
| Appl. Catal.A 350 (2008) 118–125    | FBR     | 873   | gas   | O <sub>2</sub>   | MoO <sub>x</sub> +VO <sub>x</sub> /SBA-15                             |                        | 4.20E-01              | 5.60E-01 | 1.60E-02             | 1.50E-02             |                                                                                   | 3.79E-02                                                                         |
| Appl. Catal.A 350 (2008) 118–125    | FBR     | 873   | gas   | O <sub>2</sub>   | VO <sub>x</sub> /SBA-15                                               |                        | 4.20E-01              | 4.70E-01 | 1.10E-01             | 2.70E-02             |                                                                                   | 6.83E-02                                                                         |
| Appl. Catal.A 350 (2008) 118–125    | FBR     | 873   | gas   | O <sub>2</sub>   | MoO <sub>x</sub> +VO <sub>x</sub> /SBA-15                             |                        | 6.60E-01              | 3.20E-01 | 1.80E-02             | 1.60E-02             |                                                                                   | 6.36E-02                                                                         |
| Appl. Catal.A 350 (2008) 118–125    | FBR     | 873   | gas   | O <sub>2</sub>   | VO <sub>x</sub> /SBA-15                                               |                        | 7.70E-02              | 8.00E-01 | 1.20E-01             | 2.20E-01             |                                                                                   | 1.02E-01                                                                         |
| Appl. Catal.A 350 (2008) 118–125    | FBR     | 873   | gas   | O <sub>2</sub>   | MoO <sub>x</sub> +VO <sub>x</sub> /SBA-15                             |                        | 3.90E-01              | 5.80E-01 | 3.40E-02             | 1.90E-02             |                                                                                   | 4.46E-02                                                                         |
| Catal. Commun. 9 (2008) 864–869     | FBR     | 723   | gas   | O <sub>2</sub>   | SiO <sub>2</sub>                                                      |                        |                       |          |                      | 0.00E+00             |                                                                                   | 0.00E+00                                                                         |
| Catal. Commun. 9 (2008) 864–869     | FBR     | 773   | gas   | O <sub>2</sub>   | SiO <sub>2</sub>                                                      |                        |                       |          |                      | 0.00E+00             |                                                                                   | 0.00E+00                                                                         |
| Catal. Commun. 9 (2008) 864–869     | FBR     | 823   | gas   | O <sub>2</sub>   | SiO <sub>2</sub>                                                      |                        |                       |          | 1.00E+00             | 1.00E-03             |                                                                                   | 0.00E+00                                                                         |
| Catal. Commun. 9 (2008) 864–869     | FBR     | 873   | gas   | O <sub>2</sub>   | SiO <sub>2</sub>                                                      |                        |                       |          | 1.00E+00             | 1.00E-03             |                                                                                   | 0.00E+00                                                                         |
| Catal. Commun. 9 (2008) 864–869     | FBR     | 923   | gas   | O <sub>2</sub>   | SiO <sub>2</sub>                                                      |                        | 2.80E-01              |          | 7.20E-01             | 3.00E-03             |                                                                                   | 2.84E-02                                                                         |
| Catal. Commun. 9 (2008) 864–869     | FBR     | 973   | gas   | O <sub>2</sub>   | SiO <sub>2</sub>                                                      |                        | 3.95E-01              |          | 5.60E-01             | 4.00E-03             |                                                                                   | 5.33E-02                                                                         |
| Catal. Commun. 9 (2008) 864–869     | FBR     | 1023  | gas   | O <sub>2</sub>   | SiO <sub>2</sub>                                                      |                        | 4.50E-01              |          | 4.40E-01             | 6.00E-03             |                                                                                   | 9.12E-02                                                                         |
| Catal. Commun. 9 (2008) 864–869     | FBR     | 673   | gas   | O <sub>2</sub>   | FeOx/SiO <sub>2</sub>                                                 |                        | 0.00E+00              |          | 0.00E+00             | 0.00E+00             |                                                                                   | 0.00E+00                                                                         |
| Catal. Commun. 9 (2008) 864–869     | FBR     | 723   | gas   | O <sub>2</sub>   | FeOx/SiO <sub>2</sub>                                                 |                        | 0.00E+00              |          | 0.00E+00             | 0.00E+00             |                                                                                   | 0.00E+00                                                                         |
| Catal. Commun. 9 (2008) 864–869     | FBR     | 773   | gas   | O <sub>2</sub>   | FeOx/SiO <sub>2</sub>                                                 | 6.55E-01               | 6.70E-02              |          | 2.78E-01             | 3.00E-03             | 7.08E-02                                                                          | 6.79E-03                                                                         |
| Catal. Commun. 9 (2008) 864–869     | FBR     | 823   | gas   | O <sub>2</sub>   | FeOx/SiO <sub>2</sub>                                                 | 8.73E-01               | 2.10E-02              |          | 1.06E-01             | 1.70E-02             | 5.35E-01                                                                          | 1.21E-02                                                                         |
| Catal. Commun. 9 (2008) 864–869     | FBR     | 873   | gas   | O <sub>2</sub>   | FeOx/SiO <sub>2</sub>                                                 | 9.11E-01               |                       |          | 8.90E-02             | 5.30E-02             | 1.74E+00                                                                          | 0.00E+00                                                                         |
| Catal. Commun. 9 (2008) 864–869     | FBR     | 923   | gas   | O <sub>2</sub>   | FeOx/SiO <sub>2</sub>                                                 | 8.79E-01               |                       | 1.00E-02 | 1.11E-01             | 6.90E-02             | 2.18E+00                                                                          | 0.00E+00                                                                         |
| Catal. Commun. 9 (2008) 864–869     | FBR     | 973   | gas   | O <sub>2</sub>   | FeOx/SiO <sub>2</sub>                                                 | 8.54E-01               |                       | 1.00E-03 | 1.39E-01             | 7.70E-02             | 2.37E+00                                                                          | 0.00E+00                                                                         |
| Catal. Commun. 9 (2008) 864–869     | FBR     | 1023  | gas   | O <sub>2</sub>   | FeOx/SiO <sub>2</sub>                                                 | 8.39E-01               |                       | 2.30E-02 | 1.24E-01             | 1.11E-01             | 3.35E+00                                                                          | 0.00E+00                                                                         |
| Catal. Commun. 9 (2008) 864–869     | FBR     | 673   | gas   | O <sub>2</sub>   | FeOx/SiO <sub>2</sub>                                                 | 9.28E-01               |                       | 0.00E+00 | 7.20E-02             | 2.00E-03             | 6.69E-02                                                                          | 0.00E+00                                                                         |
| Catal. Commun. 9 (2008) 864–869     | FBR     | 723   | gas   | O <sub>2</sub>   | FeOx/SiO <sub>2</sub>                                                 | 5.84E-01               |                       | 0.00E+00 | 4.16E-01             | 1.00E-03             | 2.10E-02                                                                          | 0.00E+00                                                                         |
| Catal. Commun. 9 (2008) 864–869     | FBR     | 773   | gas   | O <sub>2</sub>   | FeOx/SiO <sub>2</sub>                                                 | 8.12E-01               |                       | 0.00E+00 | 1.88E-01             | 1.00E-02             | 2.93E-01                                                                          | 0.00E+00                                                                         |
| Catal. Commun. 9 (2008) 864–869     | FBR     | 823   | gas   | O <sub>2</sub>   | FeOx/SiO <sub>2</sub>                                                 | 8.29E-01               |                       | 0.00E+00 | 1.71E-01             | 5.20E-02             | 1.55E+00                                                                          | 0.00E+00                                                                         |
| Catal. Commun. 9 (2008) 864–869     | FBR     | 873   | gas   | O <sub>2</sub>   | FeOx/SiO <sub>2</sub>                                                 | 7.90E-01               |                       | 0.00E+00 | 2.10E-01             | 1.06E-01             | 3.02E+00                                                                          | 0.00E+00                                                                         |
| Catal. Commun. 9 (2008) 864–869     | FBR     | 923   | gas   | O <sub>2</sub>   | FeOx/SiO <sub>2</sub>                                                 | 7.78E-01               |                       | 2.20E-02 | 2.00E-01             | 1.29E-01             | 3.62E+00                                                                          | 0.00E+00                                                                         |
| Catal. Commun. 9 (2008) 864–869     | FBR     | 973   | gas   | O <sub>2</sub>   | FeOx/SiO <sub>2</sub>                                                 | 7.88E-01               |                       | 3.50E-02 | 1.75E-01             | 1.32E-01             | 3.75E+00                                                                          | 0.00E+00                                                                         |
| Catal. Commun. 9 (2008) 864–869     | FBR     | 1023  | gas   | O <sub>2</sub>   | FeOx/SiO <sub>2</sub>                                                 | 7.27E-01               |                       | 1.52E-01 | 1.15E-01             | 1.36E-01             | 3.56E+00                                                                          | 0.00E+00                                                                         |
| Catal. Commun. 9 (2008) 864–869     | FBR     | 673   | gas   | O <sub>2</sub>   | FeOx/SiO <sub>2</sub>                                                 |                        | 8.73E-01              |          | 1.27E-01             | 2.00E-03             |                                                                                   | 5.90E-02                                                                         |
| Catal. Commun. 9 (2008) 864–869     | FBR     | 723   | gas   | O <sub>2</sub>   | FeOx/SiO <sub>2</sub>                                                 |                        | 8.22E-01              |          | 1.78E-01             | 6.00E-03             |                                                                                   | 1.67E-01                                                                         |
| Catal. Commun. 9 (2008) 864–869     | FBR     | 773   | gas   | O <sub>2</sub>   | FeOx/SiO <sub>2</sub>                                                 |                        | 6.93E-01              |          | 3.07E-01             | 1.30E-02             |                                                                                   | 3.04E-01                                                                         |
| Catal. Commun. 9 (2008) 864–869     | FBR     | 823   | gas   | O <sub>2</sub>   | FeOx/SiO <sub>2</sub>                                                 | 1.90E-02               | 5.14E-01              | 1.38E-01 | 3.29E-01             | 3.10E-02             | 2.12E-02                                                                          | 5.38E-01                                                                         |

**Table S2: Database with catalyst composition and their performance in methane oxidation to oxygenates under different reaction conditions.**

| Reference                               | Reactor | T / K | Phase | Oxidant        | Catalyst                                                               | S (CH <sub>3</sub> OH) | S (CH <sub>2</sub> O) | S (CO)   | S (CO <sub>2</sub> ) | X (CH <sub>4</sub> ) | STY (CH <sub>3</sub> OH)<br>[kg kg <sub>Cat</sub> <sup>-1</sup> h <sup>-1</sup> ] | STY (CH <sub>2</sub> O)<br>[kg kg <sub>Cat</sub> <sup>-1</sup> h <sup>-1</sup> ] |
|-----------------------------------------|---------|-------|-------|----------------|------------------------------------------------------------------------|------------------------|-----------------------|----------|----------------------|----------------------|-----------------------------------------------------------------------------------|----------------------------------------------------------------------------------|
| Catal. Commun. 9 (2008) 864–869         | FBR     | 873   | gas   | O <sub>2</sub> | FeOx/SiO <sub>2</sub>                                                  | 1.70E-02               | 4.75E-01              | 2.38E-01 | 2.70E-01             | 7.30E-02             | 4.47E-02                                                                          | 1.17E+00                                                                         |
| Catal. Commun. 9 (2008) 864–869         | FBR     | 923   | gas   | O <sub>2</sub> | FeOx/SiO <sub>2</sub>                                                  |                        | 5.06E-01              | 2.31E-01 | 2.63E-01             | 8.60E-02             |                                                                                   | 1.47E+00                                                                         |
| Catal. Commun. 9 (2008) 864–869         | FBR     | 973   | gas   | O <sub>2</sub> | FeOx/SiO <sub>2</sub>                                                  |                        | 5.27E-01              | 2.46E-01 | 2.21E-01             | 8.50E-02             |                                                                                   | 1.51E+00                                                                         |
| Catal. Commun. 9 (2008) 864–869         | FBR     | 1023  | gas   | O <sub>2</sub> | FeOx/SiO <sub>2</sub>                                                  | 1.17E-01               | 2.96E-01              | 3.31E-01 | 2.28E-01             | 8.50E-02             | 3.58E-01                                                                          | 8.49E-01                                                                         |
| J. Molec. Catal. 285 (2008) 169–175     | FBR     | 923   | gas   | O <sub>2</sub> | Al/SiO <sub>2</sub>                                                    | 0.00E+00               | 2.50E-02              | 7.10E-01 | 1.60E-01             |                      |                                                                                   |                                                                                  |
| J. Phys. Chem. C 2008, 112, 13700–13708 | FBR     | 898   | gas   | O <sub>2</sub> | CuO <sub>x</sub> /SBA-15                                               |                        | 7.10E-01              | 1.90E-01 | 1.00E-01             | 1.20E-02             |                                                                                   |                                                                                  |
| J. Phys. Chem. C 2008, 112, 13700–13708 | FBR     | 898   | gas   | O <sub>2</sub> | CuO <sub>x</sub> /SBA-15                                               |                        | 4.20E-01              | 4.50E-01 | 1.30E-01             | 3.80E-02             |                                                                                   |                                                                                  |
| J. Phys. Chem. C 2008, 112, 13700–13708 | FBR     | 898   | gas   | O <sub>2</sub> | CuO <sub>x</sub> /SBA-15                                               |                        | 5.80E-01              | 3.20E-01 | 1.00E-01             | 2.30E-02             |                                                                                   |                                                                                  |
| Appl. Catal.A 356 (2009) 103–111        | FBR     | 898   | gas   | O <sub>2</sub> | FeOx/SBA-15                                                            |                        | 6.90E-01              | 1.60E-01 | 1.50E-01             | 1.70E-02             |                                                                                   | 3.77E-01                                                                         |
| Appl. Catal.A 356 (2009) 103–111        | FBR     | 898   | gas   | O <sub>2</sub> | FeOx/SBA-15                                                            |                        | 5.50E-01              | 2.20E-01 | 2.30E-01             | 2.60E-02             |                                                                                   | 4.60E-01                                                                         |
| Appl. Catal.A 356 (2009) 103–111        | FBR     | 898   | gas   | O <sub>2</sub> | FeOx/SBA-15                                                            |                        | 3.70E-01              | 3.90E-01 | 2.40E-01             | 5.00E-02             |                                                                                   | 5.95E-01                                                                         |
| Appl. Catal.A 356 (2009) 103–111        | FBR     | 898   | gas   | O <sub>2</sub> | FeOx/SBA-15                                                            |                        | 3.60E-01              | 3.20E-01 | 3.20E-01             | 4.70E-02             |                                                                                   | 5.44E-01                                                                         |
| Appl. Catal.A 356 (2009) 103–111        | FBR     | 898   | gas   | O <sub>2</sub> | FeOx/SBA-15                                                            |                        | 3.00E-01              | 2.90E-01 | 4.10E-01             | 3.70E-02             |                                                                                   | 3.57E-01                                                                         |
| Appl. Catal.A 356 (2009) 103–111        | FBR     | 898   | gas   | O <sub>2</sub> | FeOx/SBA-15                                                            |                        | 2.00E-02              | 1.40E-01 | 8.40E-01             | 6.70E-02             |                                                                                   | 4.31E-02                                                                         |
| J. Natur. Gas Chem. 18(2009) 288–294    | FBR     | 898   | gas   | O <sub>2</sub> | SiO <sub>2</sub>                                                       |                        | 9.90E-01              | 0.00E+00 | 1.00E-02             | 4.00E-03             |                                                                                   | 1.27E-01                                                                         |
| J. Natur. Gas Chem. 18(2009) 288–294    | FBR     | 898   | gas   | O <sub>2</sub> | FeOx/SiO <sub>2</sub>                                                  |                        | 4.60E-01              | 2.60E-01 | 2.80E-01             | 2.90E-02             |                                                                                   | 4.29E-01                                                                         |
| J. Natur. Gas Chem. 18(2009) 288–294    | FBR     | 898   | gas   | O <sub>2</sub> | FeOx/SiO <sub>2</sub>                                                  |                        | 2.90E-01              | 4.10E-01 | 2.90E-01             | 6.60E-02             |                                                                                   | 6.16E-01                                                                         |
| J. Natur. Gas Chem. 18(2009) 288–294    | FBR     | 898   | gas   | O <sub>2</sub> | FeOx/SiO <sub>2</sub>                                                  |                        | 2.80E-01              | 4.20E-01 | 3.00E-01             | 7.10E-02             |                                                                                   | 6.40E-01                                                                         |
| J. Natur. Gas Chem. 18(2009) 288–294    | FBR     | 898   | gas   | O <sub>2</sub> | FeOx/SiO <sub>2</sub>                                                  |                        | 3.10E-01              | 3.50E-01 | 3.40E-01             | 5.20E-02             |                                                                                   | 5.19E-01                                                                         |
| J. Natur. Gas Chem. 18(2009) 288–294    | FBR     | 723   | gas   | O <sub>2</sub> | FeOx/SiO <sub>2</sub>                                                  |                        | 6.80E-01              |          |                      | 5.00E-03             |                                                                                   | 1.09E-01                                                                         |
| J. Natur. Gas Chem. 18(2009) 288–294    | FBR     | 823   | gas   | O <sub>2</sub> | FeOx/SiO <sub>2</sub>                                                  |                        | 5.30E-01              |          |                      | 1.50E-02             |                                                                                   | 2.56E-01                                                                         |
| J. Natur. Gas Chem. 18(2009) 288–294    | FBR     | 873   | gas   | O <sub>2</sub> | FeOx/SiO <sub>2</sub>                                                  |                        | 3.60E-01              |          |                      | 4.10E-02             |                                                                                   | 4.75E-01                                                                         |
| J. Natur. Gas Chem. 18(2009) 288–294    | FBR     | 723   | gas   | O <sub>2</sub> | FeOx/SiO <sub>2</sub>                                                  |                        | 6.70E-01              |          |                      | 2.00E-03             |                                                                                   | 4.31E-02                                                                         |
| J. Natur. Gas Chem. 18(2009) 288–294    | FBR     | 823   | gas   | O <sub>2</sub> | FeOx/SiO <sub>2</sub>                                                  |                        | 5.00E-01              |          |                      | 5.00E-03             |                                                                                   | 8.04E-02                                                                         |
| J. Natur. Gas Chem. 18(2009) 288–294    | FBR     | 873   | gas   | O <sub>2</sub> | FeOx/SiO <sub>2</sub>                                                  |                        | 3.70E-01              |          |                      | 1.40E-02             |                                                                                   | 1.67E-01                                                                         |
| J. Natur. Gas Chem. 18(2009) 288–294    | FBR     | 898   | gas   | O <sub>2</sub> | FeOx/SiO <sub>2</sub>                                                  |                        | 2.90E-01              |          |                      | 2.50E-02             |                                                                                   | 2.33E-01                                                                         |
| J. Natur. Gas Chem. 18(2009) 288–294    | FBR     | 898   | gas   | O <sub>2</sub> | Li-FeOx/SiO <sub>2</sub>                                               |                        | 3.30E-01              | 2.80E-01 | 3.90E-01             | 5.90E-02             |                                                                                   | 6.27E-01                                                                         |
| J. Natur. Gas Chem. 18(2009) 288–294    | FBR     | 898   | gas   | O <sub>2</sub> | B-FeOx/SiO <sub>2</sub>                                                |                        | 2.30E-01              | 3.90E-01 | 3.80E-01             | 8.30E-02             |                                                                                   | 3.07E-01                                                                         |
| J. Natur. Gas Chem. 18(2009) 288–294    | FBR     | 898   | gas   | O <sub>2</sub> | S-FeOx/SiO <sub>2</sub>                                                |                        | 2.20E-01              | 3.80E-01 | 4.00E-01             | 8.30E-02             |                                                                                   | 2.94E-01                                                                         |
| J. Natur. Gas Chem. 18(2009) 288–294    | FBR     | 898   | gas   | O <sub>2</sub> | FePO <sub>4</sub> /SiO <sub>2</sub>                                    |                        | 4.00E-01              | 4.00E-01 | 2.00E-01             | 6.00E-02             |                                                                                   | 3.86E-01                                                                         |
| J. Natur. Gas Chem. 18(2009) 288–294    | FBR     | 898   | gas   | O <sub>2</sub> | FePO <sub>4</sub> /SiO <sub>2</sub>                                    |                        | 7.30E-01              | 2.00E-01 | 7.00E-02             | 1.60E-02             |                                                                                   | 1.88E-01                                                                         |
| J. Natur. Gas Chem. 18(2009) 288–294    | FBR     | 898   | gas   | O <sub>2</sub> | Mo-FeOx/SiO <sub>2</sub>                                               |                        | 3.70E-01              | 2.60E-01 | 3.70E-01             | 3.90E-02             |                                                                                   | 4.64E-01                                                                         |
| Catal. Commun. 10 (2009) 1875–1880      | FBR     | 623   | gas   | O <sub>2</sub> | Ce <sub>2</sub> Zr <sub>2-0.4</sub> Fe <sub>0.4</sub> O <sub>8-d</sub> |                        | 5.20E-01              |          |                      | 2.00E-03             |                                                                                   |                                                                                  |
| Catal. Commun. 10 (2009) 1875–1880      | FBR     | 823   | gas   | O <sub>2</sub> | Ce <sub>2</sub> Zr <sub>2-0.4</sub> Fe <sub>0.4</sub> O <sub>8-d</sub> |                        | 2.50E-02              |          |                      | 5.20E-02             |                                                                                   |                                                                                  |
| Catal. Today 157 (2010) 143–148         | FBR     | 898   | gas   | O <sub>2</sub> | SBA-15                                                                 |                        | 9.60E-01              | 0.00E+00 | 4.00E-02             | 3.00E-03             |                                                                                   | 9.27E-02                                                                         |
| Catal. Today 157 (2010) 143–148         | FBR     | 898   | gas   | O <sub>2</sub> | CuO <sub>x</sub> /SBA-15                                               |                        | 7.10E-01              | 7.00E-02 | 2.20E-01             | 1.10E-02             |                                                                                   | 2.51E-01                                                                         |
| Catal. Today 157 (2010) 143–148         | FBR     | 898   | gas   | O <sub>2</sub> | CuO <sub>x</sub> /SBA-15                                               |                        | 7.10E-01              | 1.10E-01 | 1.80E-01             | 1.80E-02             |                                                                                   | 4.11E-01                                                                         |
| Catal. Today 157 (2010) 143–148         | FBR     | 898   | gas   | O <sub>2</sub> | CuO <sub>x</sub> /SBA-15                                               |                        | 6.50E-01              | 1.60E-01 | 1.90E-01             | 1.80E-02             |                                                                                   | 3.77E-01                                                                         |
| Catal. Today 157 (2010) 143–148         | FBR     | 898   | gas   | O <sub>2</sub> | CuO <sub>x</sub> /SBA-15                                               |                        | 5.00E-01              | 2.00E-01 | 3.00E-01             | 2.20E-02             |                                                                                   | 3.54E-01                                                                         |
| Catal. Today 157 (2010) 143–148         | FBR     | 898   | gas   | O <sub>2</sub> | CuO <sub>x</sub> /SBA-15                                               |                        | 5.00E-01              | 1.70E-01 | 3.30E-01             | 1.80E-02             |                                                                                   | 2.90E-01                                                                         |

**Table S2: Database with catalyst composition and their performance in methane oxidation to oxygenates under different reaction conditions.**

| Reference                                 | Reactor | T / K | Phase  | Oxidant                                      | Catalyst                                                                                                           | S (CH <sub>3</sub> OH) | S (CH <sub>2</sub> O) | S (CO)   | S (CO <sub>2</sub> ) | X (CH <sub>4</sub> ) | STY (CH <sub>3</sub> OH)<br>[kg kg <sub>Cat</sub> <sup>-1</sup> h <sup>-1</sup> ] | STY (CH <sub>2</sub> O)<br>[kg kg <sub>Cat</sub> <sup>-1</sup> h <sup>-1</sup> ] |          |
|-------------------------------------------|---------|-------|--------|----------------------------------------------|--------------------------------------------------------------------------------------------------------------------|------------------------|-----------------------|----------|----------------------|----------------------|-----------------------------------------------------------------------------------|----------------------------------------------------------------------------------|----------|
| Catal. Today 157 (2010) 143–148           | FBR     | 898   | gas    | O <sub>2</sub>                               | CuO <sub>x</sub> /SBA-15                                                                                           |                        | 3.60E-01              | 1.30E-01 | 5.10E-01             | 2.40E-02             |                                                                                   | 2.78E-01                                                                         |          |
| Catal. Today 157 (2010) 143–148           | FBR     | 898   | gas    | O <sub>2</sub>                               | CuO <sub>x</sub> /SBA-15                                                                                           |                        | 5.00E-01              | 1.20E-01 | 3.80E-01             | 1.70E-02             |                                                                                   | 2.74E-01                                                                         |          |
| Catal. Today 157 (2010) 143–148           | FBR     | 898   | gas    | O <sub>2</sub>                               | CuO <sub>x</sub> /SBA-15                                                                                           |                        | 3.40E-01              | 6.00E-02 | 6.00E-01             | 2.00E-02             |                                                                                   | 2.19E-01                                                                         |          |
| Appl. Catal.A 400 (2011) 122–130          | FBR     | 773   | gas    | O <sub>2</sub>                               | Cu <sup>II</sup> Fe <sup>III</sup> <sub>2</sub> (P <sub>2</sub> O <sub>7</sub> ) <sub>2</sub>                      | 4.44E-02               | 9.56E-01              |          |                      | 1.11E-03             | 3.30E-04                                                                          | 6.66E-03                                                                         |          |
| Appl. Catal.A 400 (2011) 122–130          | FBR     | 823   | gas    | O <sub>2</sub>                               | Cu <sup>II</sup> Fe <sup>III</sup> <sub>2</sub> (P <sub>2</sub> O <sub>7</sub> ) <sub>2</sub>                      | 5.56E-02               | 9.44E-01              |          |                      | 1.48E-03             | 5.51E-04                                                                          | 8.77E-03                                                                         |          |
| Appl. Catal.A 400 (2011) 122–130          | FBR     | 873   | gas    | O <sub>2</sub>                               | Cu <sup>II</sup> Fe <sup>III</sup> <sub>2</sub> (P <sub>2</sub> O <sub>7</sub> ) <sub>2</sub>                      | 3.33E-02               | 9.67E-01              |          |                      | 4.44E-03             | 9.91E-04                                                                          | 2.69E-02                                                                         |          |
| Appl. Catal.A 400 (2011) 122–131          | FBR     | 903   | gas    | O <sub>2</sub>                               | Cu <sup>II</sup> Fe <sup>III</sup> <sub>2</sub> (P <sub>2</sub> O <sub>7</sub> ) <sub>2</sub>                      | 3.33E-02               | 9.67E-01              |          |                      | 7.04E-03             | 1.57E-03                                                                          | 4.27E-02                                                                         |          |
| Appl. Catal.A 400 (2011) 122–130          | FBR     | 933   | gas    | O <sub>2</sub>                               | Cu <sup>II</sup> Fe <sup>III</sup> <sub>2</sub> (P <sub>2</sub> O <sub>7</sub> ) <sub>2</sub>                      | 1.11E-02               | 5.44E-01              |          |                      | 1.56E-02             | 1.16E-03                                                                          | 5.31E-02                                                                         |          |
| Appl. Catal.A 400 (2011) 122–130          | FBR     | 723   | gas    | O <sub>2</sub> + N <sub>2</sub> O            | Cu <sup>II</sup> Fe <sup>III</sup> <sub>2</sub> (P <sub>2</sub> O <sub>7</sub> ) <sub>2</sub>                      | 3.26E-02               | 9.67E-01              |          |                      | 1.40E-03             | 3.06E-04                                                                          | 8.51E-03                                                                         |          |
| Appl. Catal.A 400 (2011) 122–130          | FBR     | 773   | gas    | O <sub>2</sub> + N <sub>2</sub> O            | Cu <sup>II</sup> Fe <sup>III</sup> <sub>2</sub> (P <sub>2</sub> O <sub>7</sub> ) <sub>2</sub>                      | 6.52E-02               | 9.35E-01              |          |                      | 3.51E-03             | 1.53E-03                                                                          | 2.06E-02                                                                         |          |
| Appl. Catal.A 400 (2011) 122–130          | FBR     | 823   | gas    | O <sub>2</sub> + N <sub>2</sub> O            | Cu <sup>II</sup> Fe <sup>III</sup> <sub>2</sub> (P <sub>2</sub> O <sub>7</sub> ) <sub>2</sub>                      | 4.35E-02               | 9.57E-01              |          |                      | 5.61E-03             | 1.63E-03                                                                          | 3.37E-02                                                                         |          |
| Appl. Catal.A 400 (2011) 122–130          | FBR     | 873   | gas    | O <sub>2</sub> + N <sub>2</sub> O            | Cu <sup>II</sup> Fe <sup>III</sup> <sub>2</sub> (P <sub>2</sub> O <sub>7</sub> ) <sub>2</sub>                      | 3.26E-02               | 6.63E-01              | 3.04E-01 | 0.00E+00             | 1.19E-02             | 2.60E-03                                                                          | 4.96E-02                                                                         |          |
| Appl. Catal.A 400 (2011) 122–130          | FBR     | 903   | gas    | O <sub>2</sub> + N <sub>2</sub> O            | Cu <sup>II</sup> Fe <sup>III</sup> <sub>2</sub> (P <sub>2</sub> O <sub>7</sub> ) <sub>2</sub>                      | 1.09E-02               | 4.35E-01              | 5.54E-01 | 0.00E+00             | 2.11E-02             | 1.53E-03                                                                          | 5.74E-02                                                                         |          |
| Appl. Catal.A 400 (2011) 122–130          | FBR     | 933   | gas    | O <sub>2</sub> + N <sub>2</sub> O            | Cu <sup>II</sup> Fe <sup>III</sup> <sub>2</sub> (P <sub>2</sub> O <sub>7</sub> ) <sub>2</sub>                      | 1.09E-02               | 2.83E-01              | 7.07E-01 | 0.00E+00             | 3.30E-02             | 2.40E-03                                                                          | 5.84E-02                                                                         |          |
| Appl. Catal.A 400 (2011) 122–130          | FBR     | 673   | gas    | N <sub>2</sub> O                             | Cu <sup>II</sup> Fe <sup>III</sup> <sub>2</sub> (P <sub>2</sub> O <sub>7</sub> ) <sub>2</sub>                      | 4.60E-01               | 5.40E-01              |          |                      | 7.41E-04             | 2.28E-03                                                                          | 2.51E-03                                                                         |          |
| Appl. Catal.A 400 (2011) 122–130          | FBR     | 723   | gas    | N <sub>2</sub> O                             | Cu <sup>II</sup> Fe <sup>III</sup> <sub>2</sub> (P <sub>2</sub> O <sub>7</sub> ) <sub>2</sub>                      | 4.02E-01               | 5.98E-01              |          |                      | 3.33E-03             | 8.97E-03                                                                          | 1.25E-02                                                                         |          |
| Appl. Catal.A 400 (2011) 122–130          | FBR     | 773   | gas    | N <sub>2</sub> O                             | Cu <sup>II</sup> Fe <sup>III</sup> <sub>2</sub> (P <sub>2</sub> O <sub>7</sub> ) <sub>2</sub>                      | 2.93E-01               | 7.07E-01              |          |                      | 8.52E-03             | 1.67E-02                                                                          | 3.78E-02                                                                         |          |
| Appl. Catal.A 400 (2011) 122–130          | FBR     | 823   | gas    | N <sub>2</sub> O                             | Cu <sup>II</sup> Fe <sup>III</sup> <sub>2</sub> (P <sub>2</sub> O <sub>7</sub> ) <sub>2</sub>                      | 1.03E-01               | 5.29E-01              |          |                      | 2.22E-02             | 1.54E-02                                                                          | 7.37E-02                                                                         |          |
| Appl. Catal.A 400 (2011) 122–130          | FBR     | 873   | gas    | N <sub>2</sub> O                             | Cu <sup>II</sup> Fe <sup>III</sup> <sub>2</sub> (P <sub>2</sub> O <sub>7</sub> ) <sub>2</sub>                      | 1.72E-02               | 3.10E-01              | 5.63E-01 | 1.09E-01             | 5.56E-02             | 6.41E-03                                                                          | 1.08E-01                                                                         |          |
| Appl. Catal.A 400 (2011) 122–130          | FBR     | 903   | gas    | N <sub>2</sub> O                             | Cu <sup>II</sup> Fe <sup>III</sup> <sub>2</sub> (P <sub>2</sub> O <sub>7</sub> ) <sub>2</sub>                      | 1.80E-02               | 2.66E-01              | 5.94E-01 | 1.22E-01             | 6.40E-02             | 7.71E-03                                                                          | 1.07E-01                                                                         |          |
| Appl. Catal.A 400 (2011) 122–130          | FBR     | 903   | gas    | N <sub>2</sub> O                             | Cu <sup>II</sup> <sub>2</sub> (P <sub>2</sub> O <sub>7</sub> )                                                     | 1.90E-02               | 2.64E-01              | 5.03E-01 | 2.14E-01             | 4.50E-02             | 5.72E-03                                                                          | 7.45E-02                                                                         |          |
| Appl. Catal.A 400 (2011) 122–130          | FBR     | 903   | gas    | N <sub>2</sub> O                             | Cu <sup>II</sup> <sub>3.25</sub> Fe <sup>III</sup> <sub>0.5</sub> (P <sub>2</sub> O <sub>7</sub> ) <sub>2</sub>    | 2.60E-02               | 2.51E-01              | 5.38E-01 | 1.85E-01             | 4.80E-02             | 8.35E-03                                                                          | 7.55E-02                                                                         |          |
| Appl. Catal.A 400 (2011) 122–130          | FBR     | 903   | gas    | N <sub>2</sub> O                             | Cu <sup>II</sup> <sub>2.5</sub> Fe <sup>III</sup> <sub>1</sub> (P <sub>2</sub> O <sub>7</sub> ) <sub>2</sub>       | 2.50E-02               | 2.31E-01              | 6.13E-01 | 1.31E-01             | 5.10E-02             | 8.53E-03                                                                          | 7.39E-02                                                                         |          |
| Appl. Catal.A 400 (2011) 122–130          | FBR     | 903   | gas    | N <sub>2</sub> O                             | Cu <sup>II</sup> <sub>1.75</sub> Fe <sup>III</sup> <sub>1.5</sub> (P <sub>2</sub> O <sub>7</sub> ) <sub>2</sub>    | 2.30E-02               | 2.33E-01              | 6.19E-01 | 1.25E-01             | 5.40E-02             | 8.31E-03                                                                          | 7.89E-02                                                                         |          |
| Appl. Catal.A 400 (2011) 122–130          | FBR     | 903   | gas    | N <sub>2</sub> O                             | Cu <sup>II</sup> <sub>0.5</sub> Fe <sup>III</sup> <sub>2.5</sub> (P <sub>2</sub> O <sub>7</sub> ) <sub>2.125</sub> | 9.10E-02               | 7.18E-01              | 1.91E-01 | 0.00E+00             | 1.50E-02             | 9.13E-03                                                                          | 6.75E-02                                                                         |          |
| Appl. Catal.A 400 (2011) 122–130          | FBR     | 903   | gas    | N <sub>2</sub> O                             | Fe <sup>III</sup> <sub>3</sub> (P <sub>2</sub> O <sub>7</sub> ) <sub>2.25</sub>                                    | 1.01E-01               | 7.15E-01              | 1.84E-01 | 0.00E+00             | 1.30E-02             | 8.78E-03                                                                          | 5.83E-02                                                                         |          |
| J. Am. Chem. Soc. 2011, 133, 17257–17261  | BR      | room  | gas    |                                              | Beta 811 Zeolite                                                                                                   |                        | 5.65E-01              | 2.58E-01 |                      | 6.20E-02             | 2.49E-02                                                                          |                                                                                  |          |
| Appl. Catal.A 398 (2011) 150–154          | BR      | 363   | liquid | K <sub>2</sub> S <sub>2</sub> O <sub>8</sub> | Au/SiO <sub>2</sub>                                                                                                |                        | 7.15E-01              | 0.00E+00 |                      | 2.50E-01             | 9.43E-03                                                                          |                                                                                  |          |
| Catal. Today 192 (2012) 20–27             | FBR     | 923   | gas    | O <sub>2</sub>                               | VO <sub>x</sub> /MCM-41                                                                                            |                        |                       | 1.50E-02 | 6.00E-01             | 3.85E-01             | 1.06E-01                                                                          | 0.00E+00                                                                         | 1.75E-01 |
| Catal. Today 192 (2012) 20–27             | FBR     | 923   | gas    | O <sub>2</sub>                               | VO <sub>x</sub> /MCM-41                                                                                            |                        |                       | 3.00E-02 | 6.00E-01             | 3.70E-01             | 8.10E-02                                                                          | 0.00E+00                                                                         | 2.68E-01 |
| Catal. Today 192 (2012) 20–27             | FBR     | 923   | gas    | O <sub>2</sub>                               | VO <sub>x</sub> /MCM-41                                                                                            |                        |                       | 7.00E-03 | 6.00E-01             | 3.93E-01             | 1.39E-01                                                                          | 0.00E+00                                                                         | 1.07E-01 |
| Catal. Today 192 (2012) 20–27             | FBR     | 923   | gas    | O <sub>2</sub>                               | VO <sub>x</sub> /MCM-41                                                                                            |                        |                       | 8.80E-02 | 6.00E-01             | 3.12E-01             | 8.00E-02                                                                          | 0.00E+00                                                                         | 7.75E-01 |
| Catal. Today 192 (2012) 20–27             | FBR     | 923   | gas    | O <sub>2</sub>                               | VO <sub>x</sub> /MCM-41                                                                                            |                        |                       | 2.50E-02 | 6.00E-01             | 3.75E-01             | 8.50E-02                                                                          | 0.00E+00                                                                         | 2.34E-01 |
| Catal. Today 192 (2012) 20–27             | FBR     | 923   | gas    | O <sub>2</sub>                               | VO <sub>x</sub> /MCM-41                                                                                            |                        |                       | 7.00E-03 | 6.00E-01             | 3.93E-01             | 1.02E-01                                                                          | 0.00E+00                                                                         | 7.86E-02 |
| Angew. Chem. Int. Ed. 2012, 51, 5129–5133 | BR      | 323   | liquid | H <sub>2</sub> O <sub>2</sub>                | ZSM-5 (30)                                                                                                         |                        | 1.90E-01              |          |                      | 5.00E-02             | 3.00E-03                                                                          | 3.65E-02                                                                         |          |
| Angew. Chem. Int. Ed. 2012, 51, 5129–5133 | BR      | 323   | liquid | H <sub>2</sub> O <sub>2</sub>                | silicate-1                                                                                                         |                        | 0.00E+00              |          |                      | 0.00E+00             | 0.00E+00                                                                          | 0.00E+00                                                                         |          |
| Angew. Chem. Int. Ed. 2012, 51, 5129–5133 | BR      | 323   | liquid | H <sub>2</sub> O <sub>2</sub>                | Al/ZSM-5 (30)                                                                                                      |                        | 2.20E-01              |          |                      | 2.00E-02             | 2.00E-03                                                                          | 3.75E-02                                                                         |          |
| Angew. Chem. Int. Ed. 2012, 51, 5129–5133 | BR      | 323   | liquid | H <sub>2</sub> O <sub>2</sub>                | TS-1                                                                                                               |                        | 1.50E-01              |          |                      | 1.00E-02             | 0.00E+00                                                                          | 4.75E-04                                                                         |          |

**Table S2: Database with catalyst composition and their performance in methane oxidation to oxygenates under different reaction conditions.**

| Reference                                   | Reactor          | T / K | Phase  | Oxidant                       | Catalyst                                                           | S (CH <sub>3</sub> OH) | S (CH <sub>2</sub> O) | S (CO)   | S (CO <sub>2</sub> ) | X (CH <sub>4</sub> ) | STY (CH <sub>3</sub> OH)<br>[kg kg <sub>Cat</sub> <sup>-1</sup> h <sup>-1</sup> ] | STY (CH <sub>2</sub> O)<br>[kg kg <sub>Cat</sub> <sup>-1</sup> h <sup>-1</sup> ] |
|---------------------------------------------|------------------|-------|--------|-------------------------------|--------------------------------------------------------------------|------------------------|-----------------------|----------|----------------------|----------------------|-----------------------------------------------------------------------------------|----------------------------------------------------------------------------------|
| Angew. Chem. Int. Ed. 2012, 51, 5129 – 5133 | BR               | 323   | liquid | H <sub>2</sub> O <sub>2</sub> | Fe/ZSM-5 (30)                                                      | 1.20E-01               |                       |          | 1.70E-01             | 7.00E-03             | 5.29E-02                                                                          |                                                                                  |
| Angew. Chem. Int. Ed. 2012, 51, 5129 – 5133 | BR               | 323   | liquid | H <sub>2</sub> O <sub>2</sub> | Fe-Silicate-1                                                      | 1.70E-01               |                       |          | 6.00E-02             | 3.00E-03             | 3.65E-02                                                                          |                                                                                  |
| Angew. Chem. Int. Ed. 2012, 51, 5129 – 5133 | BR               | 323   | liquid | H <sub>2</sub> O <sub>2</sub> | Fe(NO <sub>3</sub> ) <sub>3</sub>                                  | 9.00E-02               |                       |          | 4.90E-01             | 1.00E-03             | 8.31E-03                                                                          |                                                                                  |
| Angew. Chem. Int. Ed. 2012, 51, 5129 – 5133 | BR               | 323   | liquid | H <sub>2</sub> O <sub>2</sub> | ZSM-5 (30)/Na <sub>2</sub> SO <sub>3</sub>                         | 3.20E-01               |                       |          | 3.00E-02             | 2.00E-03             | 5.43E-02                                                                          |                                                                                  |
| Angew. Chem. Int. Ed. 2012, 51, 5129 – 5133 | BR               | 323   | liquid | H <sub>2</sub> O <sub>2</sub> | Fe(NO <sub>3</sub> ) <sub>3</sub> /Na <sub>2</sub> SO <sub>3</sub> | 1.50E-01               |                       |          | 1.50E-01             | 0.00E+00             | 3.09E-03                                                                          |                                                                                  |
| Angew. Chem. Int. Ed. 2012, 51, 5129 – 5133 | BR               | 323   | liquid | H <sub>2</sub> O <sub>2</sub> | Cu/ZSM-5 (30)                                                      | 8.30E-01               |                       |          | 1.20E-01             | 3.00E-03             | 1.55E-01                                                                          |                                                                                  |
| Angew. Chem. Int. Ed. 2012, 51, 5129 – 5133 | BR               | 323   | liquid | H <sub>2</sub> O <sub>2</sub> | Cu-Fe/ZSM-5 (30)                                                   | 8.50E-01               |                       |          | 1.50E-01             | 7.00E-03             | 4.48E-01                                                                          |                                                                                  |
| Angew. Chem. Int. Ed. 2012, 51, 5129 – 5133 | BR               | 323   | liquid | H <sub>2</sub> O <sub>2</sub> | Fe/ZSM-5 (30) / Cu(NO <sub>3</sub> ) <sub>3</sub>                  | 8.80E-01               |                       |          | 1.20E-01             | 5.00E-03             | 3.33E-01                                                                          |                                                                                  |
| Angew. Chem. Int. Ed. 2012, 51, 5129 – 5133 | BR               | 323   | liquid | H <sub>2</sub> O <sub>2</sub> | Cu/silicate-1                                                      | 0.00E+00               |                       |          | 0.00E+00             | 0.00E+00             | 0.00E+00                                                                          |                                                                                  |
| Angew. Chem. Int. Ed. 2012, 51, 5129 – 5133 | BR               | 343   | liquid | H <sub>2</sub> O <sub>2</sub> | Fe-silicate-1                                                      | 8.00E-02               |                       |          | 4.00E-02             | 1.05E-01             | 1.79E-02                                                                          |                                                                                  |
| Angew. Chem. Int. Ed. 2012, 51, 5129 – 5133 | BR               | 343   | liquid | H <sub>2</sub> O <sub>2</sub> | Fe-silicate-1 and Cu/Silicate-1                                    | 9.30E-01               |                       |          | 7.00E-02             | 1.01E-01             | 2.00E-01                                                                          |                                                                                  |
| J. Molec. Catal. 379 (2013) 255– 262        | FBR              | 873   | gas    | O <sub>2</sub>                | Cs <sub>4</sub> [PW <sub>11</sub> O <sub>39</sub> Fe]              | 1.78E-01               | 1.65E-01              | 3.68E-01 | 2.89E-01             | 8.00E-03             | 1.45E-02                                                                          | 1.26E-02                                                                         |
| J. Molec. Catal. 379 (2013) 255– 262        | FBR              | 923   | gas    | O <sub>2</sub>                | Cs <sub>4</sub> [PW <sub>11</sub> O <sub>39</sub> Fe]              | 7.30E-02               | 2.31E-01              | 2.35E-01 | 4.61E-01             | 4.00E-02             | 2.98E-02                                                                          | 8.84E-02                                                                         |
| J. Molec. Catal. 379 (2013) 255– 262        | FBR              | 873   | gas    | N <sub>2</sub> O              | Cs <sub>4</sub> [PW <sub>11</sub> O <sub>39</sub> Fe]              | 3.36E-01               | 1.56E-01              | 4.68E-01 | 4.00E-02             | 5.00E-02             | 1.72E-01                                                                          | 7.46E-02                                                                         |
| J. Molec. Catal. 379 (2013) 255– 262        | FBR              | 923   | gas    | N <sub>2</sub> O              | Cs <sub>4</sub> [PW <sub>11</sub> O <sub>39</sub> Fe]              | 1.46E-01               | 2.40E-01              | 4.04E-01 | 2.10E-01             | 1.10E-01             | 1.64E-01                                                                          | 2.53E-01                                                                         |
| J. Molec. Catal. 379 (2013) 255– 262        | FBR              | 873   | gas    | O <sub>2</sub>                | Cs <sub>5</sub> [PW <sub>11</sub> O <sub>39</sub> Co]              | 1.48E-01               | 1.63E-01              | 4.66E-01 | 2.23E-01             | 1.00E-02             | 1.51E-02                                                                          | 1.56E-02                                                                         |
| J. Molec. Catal. 379 (2013) 255– 262        | FBR              | 923   | gas    | O <sub>2</sub>                | Cs <sub>5</sub> [PW <sub>11</sub> O <sub>39</sub> Co]              | 6.60E-02               | 2.25E-01              | 3.49E-01 | 3.60E-01             | 6.00E-02             | 4.04E-02                                                                          | 1.29E-01                                                                         |
| J. Molec. Catal. 379 (2013) 255– 262        | FBR              | 873   | gas    | N <sub>2</sub> O              | Cs <sub>5</sub> [PW <sub>11</sub> O <sub>39</sub> Co]              | 2.57E-01               | 5.10E-02              | 5.09E-01 | 1.83E-01             | 3.00E-02             | 7.87E-02                                                                          | 1.46E-02                                                                         |
| J. Molec. Catal. 379 (2013) 255– 262        | FBR              | 923   | gas    | N <sub>2</sub> O              | Cs <sub>5</sub> [PW <sub>11</sub> O <sub>39</sub> Co]              | 1.00E-01               | 2.06E-01              | 4.29E-01 | 2.64E-01             | 1.00E-01             | 1.02E-01                                                                          | 1.97E-01                                                                         |
| J. Molec. Catal. 379 (2013) 255– 262        | FBR              | 873   | gas    | O <sub>2</sub>                | Cs <sub>5</sub> [PW <sub>11</sub> O <sub>39</sub> Ni]              | 2.20E-02               | 3.80E-02              | 9.80E-02 | 8.42E-01             | 3.00E-02             | 6.74E-03                                                                          | 1.09E-02                                                                         |
| J. Molec. Catal. 379 (2013) 255– 262        | FBR              | 923   | gas    | O <sub>2</sub>                | Cs <sub>5</sub> [PW <sub>11</sub> O <sub>39</sub> Ni]              | 0.00E+00               | 0.00E+00              | 5.80E-02 | 9.42E-01             | 7.00E-02             | 0.00E+00                                                                          | 0.00E+00                                                                         |
| J. Molec. Catal. 379 (2013) 255– 262        | FBR              | 873   | gas    | N <sub>2</sub> O              | Cs <sub>5</sub> [PW <sub>11</sub> O <sub>39</sub> Ni]              | 1.12E-01               | 4.10E-02              | 6.07E-01 | 2.40E-01             | 2.00E-02             | 2.29E-02                                                                          | 7.85E-03                                                                         |
| J. Molec. Catal. 379 (2013) 255– 262        | FBR              | 923   | gas    | N <sub>2</sub> O              | Cs <sub>5</sub> [PW <sub>11</sub> O <sub>39</sub> Ni]              | 5.00E-02               | 8.10E-02              | 5.08E-01 | 3.60E-01             | 8.00E-02             | 4.08E-02                                                                          | 6.20E-02                                                                         |
| Angew. Chem. Int. Ed. 2013, 52, 1280 – 1284 | BR               | 323   | liquid | NADH/O <sub>2</sub>           | AuPd/TiO <sub>2</sub>                                              | 8.92E-01               |                       |          |                      | 1.00E-04             | 2.59E-03                                                                          |                                                                                  |
| J. Photochem. Photobio. 264 (2013) 48– 55   | BR + photo       | 573   | gas    | NO                            | V-MCM-41                                                           | 8.84E-01               |                       |          |                      | 7.10E-02             | 8.53E-05                                                                          |                                                                                  |
| Chem. Commun., 2013, 49, 240–242            | BR               | 488   | liquid | SO <sub>3</sub>               | Pt@ExLOB-900                                                       | 9.40E-01               |                       |          |                      | 3.38E-01             |                                                                                   |                                                                                  |
| ACS Catal. 2014, 4, 3013–3019               | CSTR / photocat. | 328   | liquid |                               | Bi <sub>2</sub> WO <sub>6</sub>                                    | 2.76E-01               |                       |          | 6.34E-01             | 1.40E-02             | 4.91E-04                                                                          | 0.00E+00                                                                         |
| Catal. Sci. Technol., 2014, 4, 930–935      | BR               | 298   | liquid | H <sub>2</sub> O <sub>2</sub> | trimetallic copper complex                                         | 1.00E+00               |                       |          | 0.00E+00             | 3.25E-02             | 1.40E-03                                                                          | 0.00E+00                                                                         |
| Chem. Commun., 2014, 50, 11053              |                  | 423   | gas    | NO                            | Cu–ZSM-5                                                           | 1.00E+00               |                       |          | 0.00E+00             |                      |                                                                                   | 0.00E+00                                                                         |
| Chem. Commun., 2014, 50, 11053              |                  | 573   | gas    | N <sub>2</sub> O              | Cu–ZSM-5                                                           | 1.00E+00               |                       |          | 0.00E+00             |                      |                                                                                   | 0.00E+00                                                                         |
| Chem. Commun., 2014, 50, 11053              |                  | 773   | gas    | O <sub>2</sub>                | Cu–ZSM-5                                                           | 1.00E+00               |                       |          | 0.00E+00             |                      |                                                                                   | 0.00E+00                                                                         |
| Procedia Chemistry 14 ( 2015 ) 508 – 515    | BR               | 423   | gas    |                               | Hi Co/ZSM-5                                                        |                        |                       |          |                      | 4.20E-01             |                                                                                   |                                                                                  |
| Ionics (2014) 20:445–449                    | FBR              | 298   | gas    | O <sub>2</sub>                | Ga/CZA (3%-Ga over Al <sub>2</sub> O <sub>3</sub> )                | 2.20E-01               |                       | 2.30E-01 | 1.20E-01             | 5.45E+01             |                                                                                   | 0.00E+00                                                                         |
| J. Catal. 318 (2014) 14–21                  | FBR              | 573   | gas    | N <sub>2</sub> O              | FeZSM-5                                                            | 1.90E-02               |                       | 1.20E-01 | 6.00E-02             | 3.60E-02             | 3.05E-05                                                                          | 0.00E+00                                                                         |

**Table S2: Database with catalyst composition and their performance in methane oxidation to oxygenates under different reaction conditions.**

| Reference                           | Reactor             | T / K   | Phase  | Oxidant                       | Catalyst                                            | S (CH <sub>3</sub> OH) | S (CH <sub>2</sub> O) | S (CO)   | S (CO <sub>2</sub> ) | X (CH <sub>4</sub> ) | STY (CH <sub>3</sub> OH)<br>[kg kg <sub>Cat</sub> <sup>-1</sup> h <sup>-1</sup> ] | STY (CH <sub>2</sub> O)<br>[kg kg <sub>Cat</sub> <sup>-1</sup> h <sup>-1</sup> ] |
|-------------------------------------|---------------------|---------|--------|-------------------------------|-----------------------------------------------------|------------------------|-----------------------|----------|----------------------|----------------------|-----------------------------------------------------------------------------------|----------------------------------------------------------------------------------|
| J. Catal. 318 (2014) 14–21          | FBR                 | 573     | gas    | N <sub>2</sub> O              | FeZSM-5                                             | 9.30E-02               |                       | 2.90E-01 | 7.50E-02             | 1.90E-02             | 7.88E-05                                                                          | 0.00E+00                                                                         |
| J. Catal. 318 (2014) 14–21          | FBR                 | 573     | gas    | N <sub>2</sub> O              | FeZSM-5                                             | 1.90E-01               |                       | 3.20E-01 | 7.50E-02             | 1.30E-02             | 1.10E-04                                                                          | 0.00E+00                                                                         |
| J. Catal. 318 (2014) 14–21          | FBR                 | 573     | gas    | N <sub>2</sub> O              | FeZSM-5                                             | 4.20E-01               |                       | 4.50E-01 | 4.50E-02             | 7.50E-03             | 1.40E-04                                                                          | 0.00E+00                                                                         |
| J. Catal. 318 (2014) 14–21          | FBR                 | 548     | gas    | N <sub>2</sub> O              | FeZSM-5                                             | 2.70E-02               |                       | 9.30E-02 | 4.00E-02             | 2.20E-02             | 2.65E-05                                                                          | 0.00E+00                                                                         |
| J. Catal. 318 (2014) 14–21          | FBR                 | 548     | gas    | N <sub>2</sub> O              | FeZSM-5                                             | 3.10E-01               |                       | 3.30E-01 | 6.00E-02             | 6.50E-03             | 8.98E-05                                                                          | 0.00E+00                                                                         |
| J. Catal. 318 (2014) 14–21          | FBR                 | 548     | gas    | N <sub>2</sub> O              | FeZSM-5                                             | 5.70E-01               |                       | 3.20E-01 | 5.00E-02             | 2.70E-03             | 6.86E-05                                                                          | 0.00E+00                                                                         |
| J. Catal. 318 (2014) 14–21          | FBR                 | 548     | gas    | N <sub>2</sub> O              | FeZSM-5                                             | 6.20E-01               |                       | 3.20E-01 | 3.00E-02             | 1.90E-03             | 5.25E-05                                                                          | 0.00E+00                                                                         |
| Langmuir 2014, 30, 8558–8569        | FBR                 | 448     | gas    | O <sub>2</sub>                | Ni-ZSM5                                             |                        |                       |          |                      |                      | 2.47E-04                                                                          |                                                                                  |
| Catal. Commun. 58 (2015) 200–203    | CSTR /<br>photocat. | 328     | liquid |                               | WO <sub>3</sub>                                     |                        |                       |          |                      |                      | 5.33E-04                                                                          |                                                                                  |
| Appl. Catal. B 163 (2015) 150–155   | CSTR /<br>photocat. | 328     | liquid |                               | WO <sub>3</sub> /Fe <sup>3+</sup>                   | 3.74E-01               |                       |          | 5.89E-01             | 1.23E-02             | 1.78E-03                                                                          | 0.00E+00                                                                         |
| Appl. Catal. B 163 (2015) 150–155   | CSTR /<br>photocat. | 328     | liquid |                               | WO <sub>3</sub> /Fe <sup>3+</sup>                   | 5.85E-01               |                       |          | 3.75E-01             | 9.58E-03             | 2.16E-03                                                                          | 0.00E+00                                                                         |
| Catal. Sci. Technol., 2015, 5, 4108 | BR                  | 313     | liquid | H <sub>2</sub> O <sub>2</sub> | trimetallic copper<br>complex/HNO <sub>3</sub>      | 1.90E-02               |                       |          | 9.81E-01             |                      |                                                                                   | 0.00E+00                                                                         |
| Catal. Sci. Technol., 2015, 5, 4108 | BR                  | 313     | liquid | H <sub>2</sub> O <sub>2</sub> | Cu(NO <sub>3</sub> ) <sub>2</sub> /HNO <sub>3</sub> | 1.29E-02               |                       |          | 9.87E-01             |                      |                                                                                   | 0.00E+00                                                                         |
| Chem. Commun., 2015, 51, 7249–7252  | CSTR /<br>photocat. | 328     | liquid |                               | Bi <sub>2</sub> WO <sub>6</sub>                     | 6.00E-02               |                       |          |                      | 1.60E-02             | 1.23E-03                                                                          |                                                                                  |
| Chem. Commun., 2015, 51, 7249–7252  | CSTR /<br>photocat. | 328     | liquid |                               | Bi <sub>2</sub> WO <sub>6</sub>                     | 2.80E-01               |                       |          |                      | 1.40E-02             | 5.02E-03                                                                          |                                                                                  |
| Chem. Commun., 2015, 51, 7249–7252  | CSTR /<br>photocat. | 328     | liquid |                               | Bi <sub>2</sub> WO <sub>6</sub> + NaNO <sub>3</sub> | 4.00E-02               |                       |          |                      | 9.90E-02             | 5.07E-03                                                                          |                                                                                  |
| Chem. Commun., 2015, 51, 7249–7252  | CSTR /<br>photocat. | 328     | liquid |                               | Bi <sub>2</sub> WO <sub>6</sub> + NaNO <sub>3</sub> | 1.10E-01               |                       |          |                      | 4.50E-02             | 6.34E-03                                                                          |                                                                                  |
| RSC Adv., 2015, 5, 69509            | FBR                 | 823-963 | gas    | O <sub>2</sub>                | VOx/Ti-SBA-15                                       |                        | 4.70E-01              |          |                      | 1.00E-02             |                                                                                   | 1.20E+00                                                                         |
| RSC Adv., 2015, 5, 69510            | FBR                 | 823-963 | gas    | O <sub>2</sub>                | VOx/Ti-SBA-15                                       |                        | 4.00E-01              |          |                      | 2.00E-02             |                                                                                   | 2.10E+00                                                                         |
| RSC Adv., 2015, 5, 69511            | FBR                 | 823-963 | gas    | O <sub>2</sub>                | VOx/Ti-SBA-15                                       |                        | 3.00E-01              |          |                      | 3.00E-02             |                                                                                   | 2.30E+00                                                                         |
| RSC Adv., 2015, 5, 69512            | FBR                 | 823-963 | gas    | O <sub>2</sub>                | VOx/Ti-SBA-15                                       |                        | 2.50E-01              |          |                      | 4.00E-02             |                                                                                   | 2.60E+00                                                                         |
| RSC Adv., 2015, 5, 69513            | FBR                 | 823-963 | gas    | O <sub>2</sub>                | VOx/Ti-SBA-15                                       |                        | 2.00E-01              |          |                      | 5.00E-02             |                                                                                   | 2.60E+00                                                                         |
| ACS Cent. Sci. 2016, 2, 424–429     | FBR                 | 483     | gas    | O <sub>2</sub>                | H-ZSM-5                                             |                        |                       |          |                      |                      | 5.20E-03                                                                          |                                                                                  |
| ACS Cent. Sci. 2016, 2, 424–429     | FBR                 | 483     | gas    | O <sub>2</sub>                | H-Beta                                              |                        |                       |          |                      |                      | 2.40E-03                                                                          |                                                                                  |
| ACS Cent. Sci. 2016, 2, 424–429     | FBR                 | 483     | gas    | O <sub>2</sub>                | MCM-41                                              |                        |                       |          |                      |                      | 6.00E-04                                                                          |                                                                                  |
| ACS Cent. Sci. 2016, 2, 424–429     | FBR                 | 483     | gas    | O <sub>2</sub>                | H-ZSM-5                                             |                        |                       |          |                      |                      | 6.00E-03                                                                          |                                                                                  |
| ACS Cent. Sci. 2016, 2, 424–429     | FBR                 | 483     | gas    | O <sub>2</sub>                | H-mordenite                                         |                        |                       |          |                      |                      | 4.60E-03                                                                          |                                                                                  |
| ACS Cent. Sci. 2016, 2, 424–429     | FBR                 | 483     | gas    | O <sub>2</sub>                | H-ferrierite                                        |                        |                       |          |                      |                      | 2.70E-03                                                                          |                                                                                  |
| ACS Cent. Sci. 2016, 2, 424–429     | FBR                 | 483     | gas    | O <sub>2</sub>                | Na-ZSM-5                                            | 7.06E-01               |                       |          |                      | only<br>byproduct    | 2.20E-03                                                                          |                                                                                  |
| ACS Cent. Sci. 2016, 2, 424–429     | FBR                 | 483     | gas    | O <sub>2</sub>                | Na-Y                                                |                        |                       |          |                      |                      | 3.00E-03                                                                          |                                                                                  |
| ACS Cent. Sci. 2016, 2, 424–429     | FBR                 | 483     | gas    | O <sub>2</sub>                | Na-SAPO-34                                          |                        |                       |          |                      |                      | 7.90E-03                                                                          |                                                                                  |
| ACS Cent. Sci. 2016, 2, 424–429     | FBR                 | 483     | gas    | O <sub>2</sub>                | Na-SSZ-13                                           |                        |                       |          |                      |                      | 6.10E-03                                                                          |                                                                                  |
| Catal. Sci. Technol., 2016, 6, 3410 | BR                  | 323     | liquid | H <sub>2</sub> O <sub>2</sub> | 2.5% Au 2.5% Pd/TiO <sub>2</sub>                    | 6.82E-01               |                       |          | 1.67E-01             |                      |                                                                                   |                                                                                  |
| Catal. Sci. Technol., 2016, 6, 3410 | BR                  | 323     | liquid | H <sub>2</sub> O <sub>2</sub> | 2.5% Au 2.5% Pd 2.5%<br>Cu/TiO <sub>2</sub>         | 8.18E-01               |                       |          | 1.82E-01             |                      |                                                                                   |                                                                                  |
| Catal. Sci. Technol., 2016, 6, 3410 | BR                  | 323     | liquid | H <sub>2</sub> O <sub>2</sub> | 2.5% Au 2.5% Pd 1.0%<br>Cu/TiO <sub>2</sub>         | 7.50E+01               |                       |          | 2.50E-01             |                      |                                                                                   |                                                                                  |



**Table S2: Database with catalyst composition and their performance in methane oxidation to oxygenates under different reaction conditions.**

| Reference                                | Reactor | T / K | Phase  | Oxidant                                         | Catalyst                                                                                                | S (CH <sub>3</sub> OH) | S (CH <sub>2</sub> O) | S (CO) | S (CO <sub>2</sub> ) | X (CH <sub>4</sub> ) | STY (CH <sub>3</sub> OH)<br>[kg kg <sub>Cat</sub> <sup>-1</sup> h <sup>-1</sup> ] | STY (CH <sub>2</sub> O)<br>[kg kg <sub>Cat</sub> <sup>-1</sup> h <sup>-1</sup> ] |
|------------------------------------------|---------|-------|--------|-------------------------------------------------|---------------------------------------------------------------------------------------------------------|------------------------|-----------------------|--------|----------------------|----------------------|-----------------------------------------------------------------------------------|----------------------------------------------------------------------------------|
| Catal. Sci. Technol., 2016, 6, 3410      | BR      | 323   | liquid | H <sub>2</sub> O <sub>2</sub>                   | 2.5% Au 2.5% Pd 0.5% Cu/TiO <sub>2</sub>                                                                | 6.08E-01               |                       |        | 3.92E-01             |                      |                                                                                   |                                                                                  |
| Catal. Sci. Technol., 2016, 6, 3410      | BR      | 323   | liquid | H <sub>2</sub> O <sub>2</sub>                   | Au 2.5% Pd/TiO <sub>2</sub><br>2.5%Cu/TiO <sub>2</sub>                                                  | 8.31E-01               |                       |        | 1.69E-01             |                      |                                                                                   |                                                                                  |
| Catal. Today 270 (2016) 93–100           | FRB     | 323   | gas    | H <sub>2</sub> O <sub>2</sub>                   | 1.5% Fe 1.5% Cu/ZSM-5                                                                                   | 9.20E-01               |                       |        | 7.80E-02             | 5.00E-03             | 2.59E-03                                                                          |                                                                                  |
| Reference                                | Reactor | T / K | Phase  | Oxidant                                         | Catalyst                                                                                                | S (CH <sub>3</sub> OH) | S (CH <sub>2</sub> O) | S (CO) | S (CO <sub>2</sub> ) | X (CH <sub>4</sub> ) | STY (CH <sub>3</sub> OH)<br>[kg L <sup>-1</sup> h <sup>-1</sup> ]                 | STY (CH <sub>2</sub> O)<br>[kg L <sup>-1</sup> h <sup>-1</sup> ]                 |
| Science, 1993, 259, 340-343              | BR      | 453   | liquid | H <sub>2</sub> SO <sub>4</sub>                  | Hg(CF <sub>3</sub> SO <sub>3</sub> ) <sub>2</sub>                                                       | 0.85                   | 0.85                  |        |                      | 0.5                  | 1.15E-02                                                                          |                                                                                  |
| J.Am.Chem. Soc., 1996, 118, 4574-4580    | BR      | 353   | liquid | O <sub>2</sub>                                  | RhCl <sub>3</sub> *3H <sub>2</sub> O<br>(bpym)PtCl <sub>2</sub> - Periana-Catalytica                    |                        |                       |        |                      |                      | 3.73E-04                                                                          |                                                                                  |
| Science, 1998, 280, 560-564              | BR      | 493   | liquid | H <sub>2</sub> SO <sub>4</sub>                  | (bpym)PtCl <sub>2</sub> - Periana-Catalytica                                                            | 0.81                   | 0.81                  |        |                      | 0.9                  | 1.15E-01                                                                          | 6.00E-07                                                                         |
| Chem. Comm., 2000, 1131-1132             | BR      | 353   | liquid | H <sub>2</sub> O <sub>2</sub>                   | OsCl <sub>3</sub>                                                                                       | 0.998                  | 0.002                 |        |                      |                      | 3.63E-04                                                                          | 6.00E-07                                                                         |
| J. Catal. 2000, 196, 287-292             | BR      | 453   | liquid | SO <sub>3</sub>                                 | HgSO <sub>4</sub>                                                                                       |                        |                       |        |                      |                      | 3.88E-04                                                                          |                                                                                  |
| Chem. Commun. 2002, 2376-2377            | BR      | 468   | liquid | SO <sub>3</sub>                                 | I <sub>2</sub>                                                                                          | 0.95                   |                       |        |                      | 0.31                 |                                                                                   |                                                                                  |
| J. Catal. 2003, 215, 14-19               | BR      | 433   | liquid | SO <sub>3</sub>                                 | Pd                                                                                                      | 0.59                   |                       |        | 0.41                 | 0.15                 | 2.57E-03                                                                          |                                                                                  |
| Science 2003, 301, 814-818               | BR      | 453   | liquid |                                                 | PdSO <sub>4</sub>                                                                                       | 0.89                   |                       |        |                      |                      |                                                                                   |                                                                                  |
| Applied Catal. A 2004, 261, 91-98        | BR      | 453   | liquid | SO <sub>3</sub>                                 | I <sub>2</sub>                                                                                          | 0.92                   |                       |        | 0.05                 | 0.35                 |                                                                                   |                                                                                  |
| Applied Catal. A 2006, 307, 270-274      | BR      | 453   | liquid | SO <sub>3</sub>                                 | PtCl <sub>4</sub>                                                                                       |                        |                       |        |                      |                      | 6.72E-03                                                                          |                                                                                  |
| J. Am. Chem. Soc. 2006, 128, 16028-16029 | BR      | 353   | liquid | O <sub>2</sub>                                  | Pd <sup>2+</sup> /Pd <sup>0</sup> , Q/H <sub>2</sub> Q, and NO <sub>2</sub> /NO in CF <sub>3</sub> COOH |                        |                       |        |                      |                      | 1.31E-04                                                                          |                                                                                  |
| Catal. Today 140 (2009) 157–161          | BR      | 453   | liquid | O <sub>2</sub>                                  | Mn <sub>2</sub> O <sub>3</sub>                                                                          | 0.95                   |                       |        |                      | 0.36                 | 4.84E-04                                                                          |                                                                                  |
| I&ECResearch, 2011, 50, 6513-6516        | BR      | 353   | liquid | O <sub>2</sub>                                  | Pd(OAc) <sub>2</sub> /BQ/H <sub>5</sub> PMo <sub>10</sub> V <sub>2</sub> O <sub>40</sub>                | 0.89                   |                       |        |                      |                      | 1.12E-04                                                                          |                                                                                  |
| Applied Catal. A 2011, 394, 266-268      | BCR     | 403   | liquid | SO <sub>3</sub>                                 | I <sub>2</sub>                                                                                          |                        |                       |        |                      |                      | 1.23E-05                                                                          |                                                                                  |
| Catal. Lett. 2013, 143, 610-615          | BR      | 393   | liquid | O <sub>2</sub>                                  | PdCl <sub>2</sub> (bpy)/BQ/H <sub>5</sub> PMo <sub>10</sub> V <sub>2</sub> O <sub>40</sub>              |                        |                       |        |                      |                      | 1.72E-05                                                                          |                                                                                  |
| Catal. Lett. 2013, 143, 126-129          | BR      | 353   | liquid | O <sub>2</sub>                                  | K <sub>2</sub> PdCl <sub>4</sub> / H <sub>5</sub> PMo <sub>10</sub> V <sub>2</sub> O <sub>40</sub>      | 0.16                   |                       |        |                      | 0.04                 | 1.62E-04                                                                          |                                                                                  |
| Eur. J. Inorg. Chem. 2013, 3659–3663     | BR      | 453   | liquid | O <sub>2</sub>                                  | Co <sup>II</sup> /Co <sup>III</sup>                                                                     |                        |                       |        |                      |                      | 1.35E-03                                                                          |                                                                                  |
| Science 2014, 343, 1232-1237             | BR      | 453   | liquid | Tl(TFA) <sub>3</sub>                            |                                                                                                         | 1                      |                       |        |                      | 0.74                 | 1.97E-03                                                                          |                                                                                  |
| Science 2014, 343, 1232-1237             | BR      | 453   | liquid | Pb(TFA) <sub>4</sub>                            |                                                                                                         | 1                      |                       |        |                      | 0.76                 | 2.02E-03                                                                          |                                                                                  |
| Dalton Trans. 2015, 44, 5294-5298        | BR      | 473   | liquid |                                                 | KIO <sub>4</sub> / KCl                                                                                  | 0.42                   |                       |        |                      |                      |                                                                                   |                                                                                  |
| J. Am. Chem. Soc. 2016, 138, 12395-12400 | BR      | 488   | liquid | H <sub>2</sub> SO <sub>4</sub> +SO <sub>3</sub> | K <sub>2</sub> PtCl <sub>4</sub>                                                                        | 0.99                   |                       |        |                      | 0.26                 | 5.01E-01                                                                          |                                                                                  |
